# Supplementary material for: How can observational data be used to improve the modeling of human-managed reservoirs in large-scale hydrological models?
Source: Copernicus journal article supplement (doi:10.5194/hess-2024-291), 2024-10-25

*Supplement of*

# **How can observational data be used to improve the modeling of human-managed reservoirs in large-scale hydrological models?**

Seyed-Mohammad Hosseini-Moghari<sup>1</sup>, Petra Döll<sup>1, 2</sup>

<sup>1</sup>Institute of Physical Geography, Goethe University Frankfurt, Frankfurt am Main, Germany

<sup>2</sup>Senckenberg Leibniz Biodiversity and Climate Research Centre Frankfurt (SBIK-F), Frankfurt am Main, Germany

*Correspondence to:* Seyed-Mohammad Hosseini-Moghari ([hosseinimoghari@em.uni-frankfurt.de](mailto:hosseinimoghari@em.uni-frankfurt.de))

**Table S1.** Summary information for the 100 reservoirs in this study, based on the ResOpsUS and GRand datasets. The “Observed data” column indicates which reservoir data are available, with 'I' representing inflow, 'O' representing outflow, and 'S' representing storage. Reservoirs marked with an asterisk (\*) indicate those without upstream global reservoirs in the WaterGAP model. Data from GRand, unless the column name includes 'observed'.

| GRanD ID | Dam name          | Longitude | Latitude | GRanD capacity [km <sup>3</sup> ] | Observed maximum monthly storage [km <sup>3</sup> ] | Observed maximum daily storage [km <sup>3</sup> ] | Commissioning year | primary purpose | Observed data |
|----------|-------------------|-----------|----------|-----------------------------------|-----------------------------------------------------|---------------------------------------------------|--------------------|-----------------|---------------|
| 610      | Hoover            | -114.73   | 36.02    | 36.70                             | 32.90                                               | 36.89                                             | 1935               | supply          | OS            |
| 753      | Garrison          | -101.43   | 47.51    | 30.22                             | 29.28                                               | 36.10                                             | 1953               | flood           | IOS           |
| 870      | Oahe              | -100.40   | 44.46    | 29.11                             | 28.08                                               | 28.33                                             | 1966               | flood           | IOS           |
| 597      | Glen Canyon       | -110.73   | 37.37    | 25.07                             | 31.58                                               | 31.69                                             | 1963               | electricity     | IOS           |
| 307      | Fort Peck         | -106.41   | 48.00    | 23.56                             | 23.17                                               | 23.81                                             | 1957               | flood           | IOS           |
| 1753     | Kentucky          | -88.09    | 36.27    | 7.56                              | 2.68                                                | 3.67                                              | 1944               | navigation      | IOS           |
| 297*     | Libby             | -115.32   | 48.41    | 7.43                              | 6.16                                                | 7.17                                              | 1973               | electricity     | IOS           |
| 1036     | Bull Shoals       | -92.57    | 36.37    | 6.67                              | 6.57                                                | 6.80                                              | 1951               | flood           | IOS           |
| 989      | Harry S. Truman   | -93.41    | 38.27    | 6.42                              | 5.19                                                | 6.19                                              | 1978               | electricity     | IOS           |
| 1135     | Denison           | -96.57    | 33.82    | 6.41                              | 6.47                                                | 7.41                                              | 1944               | flood           | OS            |
| 1269     | Toledo Bend       | -93.57    | 31.18    | 6.29                              | 5.73                                                | 6.04                                              | 1966               | electricity     | OS            |
| 1077     | Eufaula           | -95.36    | 35.31    | 4.72                              | 4.29                                                | 5.22                                              | 1964               | flood           | OS            |
| 1026     | Table Rock        | -93.31    | 36.60    | 4.27                              | 4.21                                                | 4.56                                              | 1959               | flood           | IOS           |
| 740*     | Lower Red         | -95.08    | 48.04    | 4.23                              | 3.17                                                | 3.37                                              | 1931               | flood           | OS            |
| 1294     | Mansfield         | -97.91    | 30.39    | 3.98                              | 1.72                                                | 2.24                                              | 1942               | irrigation      | OS            |
| 1848*    | Sardis            | -89.79    | 34.41    | 3.72                              | 2.13                                                | 2.21                                              | 1940               | flood           | IOS           |
| 1869*    | Grenada           | -89.77    | 33.82    | 3.36                              | 2.12                                                | 2.21                                              | 1954               | flood           | IOS           |
| 1863*    | Buford            | -84.07    | 34.16    | 3.15                              | 3.32                                                | 3.63                                              | 1958               | flood           | OS            |
| 1770*    | Norris            | -84.09    | 36.23    | 3.15                              | 1.34                                                | 1.52                                              | 1936               | flood           | OS            |
| 965*     | Tuttle Creek      | -96.60    | 39.26    | 2.78                              | 2.24                                                | 2.90                                              | 1962               | flood           | OS            |
| 1247     | Whitney           | -97.37    | 31.87    | 2.59                              | 1.74                                                | 2.44                                              | 1951               | supply          | OS            |
| 7313     | Canyon Ferry      | -111.73   | 46.65    | 2.53                              | 2.47                                                | 2.53                                              | 1953               | electricity     | IOS           |
| 1287     | Livingston        | -95.02    | 30.63    | 2.52                              | 2.32                                                | 2.57                                              | 1969               | flood           | OS            |
| 1186*    | Ferrells Bridge   | -94.50    | 32.75    | 2.47                              | 0.77                                                | 0.86                                              | 1958               | supply          | OS            |
| 1042*    | Norfolk           | -92.24    | 36.25    | 2.45                              | 2.41                                                | 2.50                                              | 1944               | flood           | IOS           |
| 884      | Big Bend          | -99.45    | 44.04    | 2.34                              | 2.18                                                | 2.26                                              | 1963               | flood           | IOS           |
| 1273     | Belton            | -97.47    | 31.11    | 2.31                              | 1.37                                                | 1.44                                              | 1954               | recreation      | OS            |
| 961*     | Clarence Cannon   | -91.65    | 39.53    | 2.30                              | 1.09                                                | 1.31                                              | 1983               | flood           | OS            |
| 1144     | Millwood          | -93.97    | 33.70    | 2.29                              | 1.64                                                | 1.84                                              | 1966               | flood           | IOS           |
| 616      | Davis             | -114.66   | 35.47    | 2.24                              | 2.18                                                | 2.23                                              | 1952               | electricity     | OS            |
| 911*     | Red Rock          | -92.98    | 41.37    | 2.17                              | 1.98                                                | 2.25                                              | 1969               | flood           | OS            |
| 1006*    | Stockton          | -93.77    | 37.69    | 2.06                              | 1.58                                                | 1.78                                              | 1969               | flood           | IOS           |
| 1048     | Keystone          | -96.26    | 36.15    | 2.06                              | 1.74                                                | 2.31                                              | 1964               | flood           | IOS           |
| 1123     | Broken Bow        | -94.68    | 34.15    | 1.98                              | 1.54                                                | 1.68                                              | 1967               | flood           | OS            |
| 1032     | Oologah           | -95.68    | 36.42    | 1.92                              | 1.66                                                | 2.18                                              | 1963               | flood           | IOS           |
| 1774     | Cherokee Saddle 1 | -83.50    | 36.17    | 1.90                              | 0.91                                                | 0.96                                              | 1941               | flood           | OS            |
| 1781*    | Douglas           | -83.53    | 35.96    | 1.90                              | 0.85                                                | 0.94                                              | 1943               | flood           | OS            |
| 355      | Yellowtail        | -108.08   | 45.23    | 1.76                              | 1.50                                                | 1.68                                              | 1965               | irrigation      | IOS           |
| 1101*    | Arkabutla         | -90.12    | 34.76    | 1.71                              | 0.79                                                | 0.91                                              | 1943               | flood           | IOS           |
| 1023     | Kaw               | -96.93    | 36.70    | 1.64                              | 1.36                                                | 1.76                                              | 1976               | flood           | IOS           |
| 1060*    | Tenkiller         | -95.04    | 35.60    | 1.52                              | 1.27                                                | 1.47                                              | 1952               | flood           | OS            |
| 1864*    | Enid              | -89.73    | 34.17    | 1.50                              | 0.93                                                | 0.95                                              | 1952               | flood           | IOS           |
| 1797     | Watts Bar         | -84.51    | 35.83    | 1.45                              | 0.66                                                | 0.80                                              | 1942               | navigation      | OS            |
| 305      | Albeni Falls      | -117.00   | 48.18    | 1.42                              | 1.90                                                | 1.99                                              | 1955               | electricity     | OS            |
| 968      | Milford           | -96.90    | 39.08    | 1.41                              | 1.23                                                | 1.66                                              | 1967               | flood           | OS            |
| 1019*    | Wappapello        | -90.29    | 36.93    | 1.40                              | 0.69                                                | 0.94                                              | 1941               | flood           | OS            |

|       |                       |         |       |      |      |      |      |             |     |
|-------|-----------------------|---------|-------|------|------|------|------|-------------|-----|
| 1302* | Canyon                | -98.20  | 29.87 | 1.39 | 0.88 | 0.99 | 1964 | supply      | OS  |
| 1824  | Pickwick Landing      | -88.25  | 35.07 | 1.36 | 0.63 | 0.77 | 1938 | navigation  | OS  |
| 1316* | Choke Canyon          | -98.25  | 28.49 | 1.34 | 0.88 | 0.96 | 1981 | recreation  | OS  |
| 1835  | Wheeler               | -87.38  | 34.81 | 1.32 | 0.72 | 0.98 | 1936 | electricity | OS  |
| 1847  | Guntersville          | -86.39  | 34.42 | 1.29 | 0.69 | 0.94 | 1939 | navigation  | OS  |
| 1231* | Blackburn Crossing    | -95.44  | 32.06 | 1.29 | 0.55 | 0.65 | 1971 | supply      | OS  |
| 1140* | Lake Kemp             | -99.15  | 33.76 | 1.28 | 0.40 | 0.51 | 1923 | irrigation  | OS  |
| 1296* | Somerville            | -96.53  | 30.32 | 1.27 | 0.62 | 0.68 | 1967 | irrigation  | OS  |
| 1659* | Lake Shelbyville      | -88.78  | 39.41 | 1.27 | 0.59 | 0.69 | 1970 | flood       | OS  |
| 1277* | Stillhouse-Hollow     | -97.53  | 31.02 | 1.25 | 0.78 | 0.81 | 1968 | supply      | OS  |
| 1021* | Great Salt Plains La  | -98.14  | 36.74 | 1.22 | 0.12 | 0.23 | 1941 | flood       | IOS |
| 1280  | Buchanan              | -98.42  | 30.75 | 1.21 | 1.08 | 1.11 | 1937 | irrigation  | OS  |
| 1120* | Waurika               | -98.05  | 34.24 | 1.15 | 0.37 | 0.45 | 1977 | flood       | IOS |
| 182*  | Mormon Island Saddle  | -121.12 | 38.77 | 1.10 | 1.20 | 1.26 | 1955 | irrigation  | IOS |
| 7311* | Elk City              | -95.80  | 37.26 | 1.05 | 0.28 | 0.44 | 1966 | Flood       | IOS |
| 1755* | Barren River          | -86.12  | 36.90 | 1.01 | 0.78 | 0.84 | 1964 | flood       | IOS |
| 1152* | Jim Chapman           | -95.62  | 33.32 | 0.98 | 0.50 | 0.56 | 1991 | supply      | OS  |
| 1192  | Caddo                 | -93.92  | 32.71 | 0.93 | 0.43 | 0.91 | 1914 | navigation  | IOS |
| 541*  | Blue Mesa             | -107.18 | 38.47 | 0.92 | 1.01 | 1.03 | 1965 | electricity | IOS |
| 1822  | Chickamauga           | -85.23  | 35.10 | 0.91 | 0.42 | 0.55 | 1940 | navigation  | OS  |
| 972*  | Wilson                | -98.49  | 38.96 | 0.91 | 0.80 | 0.82 | 1964 | flood       | OS  |
| 613   | Cochiti               | -106.31 | 35.62 | 0.89 | 0.46 | 0.49 | 1975 | flood       | OS  |
| 1086* | Santa Rosa            | -104.69 | 35.03 | 0.88 | 0.14 | 0.15 | 1979 | flood       | OS  |
| 1295  | Conroe                | -95.57  | 30.36 | 0.87 | 0.55 | 0.66 | 1973 | irrigation  | OS  |
| 1139* | Lake Arrowhead        | -98.37  | 33.76 | 0.84 | 0.33 | 0.35 | 1966 | flood       | OS  |
| 1862* | Allatoona             | -84.73  | 34.17 | 0.83 | 0.72 | 0.85 | 1965 | flood       | OS  |
| 629   | Parker                | -114.14 | 34.30 | 0.80 | 0.75 | 1.06 | 1938 | supply      | OS  |
| 1000* | Pomme De Terre        | -93.32  | 37.90 | 0.80 | 0.55 | 0.62 | 1961 | flood       | OS  |
| 7306  | Wilson                | -87.50  | 34.82 | 0.79 | 0.39 | 0.41 | 1924 | electricity | OS  |
| 991*  | John Redmond          | -95.76  | 38.24 | 0.77 | 0.62 | 0.80 | 1964 | flood       | OS  |
| 998   | John Martin           | -102.94 | 38.07 | 0.75 | 0.53 | 0.56 | 1943 | flood       | OS  |
| 7317  | Tims Ford             | -86.27  | 35.22 | 0.75 | 0.34 | 0.37 | 1970 | Flood       | OS  |
| 1716* | Rend                  | -88.96  | 38.04 | 0.75 | 0.40 | 0.54 | 1971 | flood       | IOS |
| 1896  | West Point            | -85.19  | 32.92 | 0.75 | 0.79 | 0.91 | 1974 | flood       | OS  |
| 1883* | Wallace               | -83.16  | 33.35 | 0.73 | 0.06 | 0.15 | 1980 | electricity | IOS |
| 1285* | Granger               | -97.33  | 30.70 | 0.69 | 0.30 | 0.33 | 1979 | recreation  | OS  |
| 1266* | Sterling C. Robertson | -96.33  | 31.33 | 0.69 | 0.28 | 0.30 | 1978 | irrigation  | OS  |
| 1176* | Morris Sheppard       | -98.43  | 32.87 | 0.69 | 0.69 | 0.92 | 1941 | supply      | OS  |
| 924*  | Rathbun               | -92.89  | 40.83 | 0.68 | 0.64 | 0.72 | 1972 | flood       | OS  |
| 758   | Winnibigoshish        | -94.17  | 47.45 | 0.68 | 1.02 | 1.44 | 1884 | supply      | OS  |
| 1257  | Simon Freese          | -99.67  | 31.50 | 0.67 | 0.52 | 0.53 | 1989 | recreation  | OS  |
| 895   | Gavins Point          | -97.49  | 42.85 | 0.67 | 0.57 | 0.69 | 1958 | flood       | IOS |
| 1317  | Wesley E. Seale       | -97.87  | 28.05 | 0.66 | 0.34 | 0.39 | 1958 | recreation  | OS  |
| 1242  | Red Bluff             | -103.91 | 31.90 | 0.64 | 0.35 | 0.43 | 1936 | irrigation  | OS  |
| 107*  | Lost Creek            | -122.65 | 42.69 | 0.62 | 0.57 | 0.58 | 1976 | flood       | OS  |
| 1841* | Carters Main          | -84.67  | 34.62 | 0.58 | 0.51 | 0.58 | 1974 | flood       | OS  |
| 907*  | Coralville            | -91.53  | 41.73 | 0.57 | 0.57 | 0.69 | 1958 | flood       | OS  |
| 80*   | Detroit               | -122.25 | 44.72 | 0.56 | 0.55 | 0.56 | 1953 | electricity | OS  |
| 981   | Kanopolis             | -97.97  | 38.61 | 0.53 | 0.29 | 0.50 | 1948 | flood       | OS  |
| 1236* | Proctor               | -98.48  | 31.97 | 0.53 | 0.39 | 0.47 | 1963 | supply      | OS  |
| 1093* | Wister                | -94.72  | 34.94 | 0.53 | 0.54 | 0.71 | 1949 | flood       | IOS |
| 1709* | Summersville          | -80.89  | 38.22 | 0.51 | 0.25 | 0.39 | 1965 | flood       | IOS |
| 1017* | Clearwater            | -90.77  | 37.14 | 0.51 | 0.50 | 0.55 | 1942 | flood       | IOS |
| 1194  | Benbrook              | -97.47  | 32.66 | 0.51 | 0.22 | 0.26 | 1951 | supply      | OS  |

**Table S2.** The ranges for each parameter in each algorithm (formatted as [start: increment rate: end]) along with the total number of parameter sets per algorithm. The number of parameter sets in the CH differs for irrigation and non-irrigation reservoirs due to the fact that  $a_2$  is only applied for irrigation reservoirs.

|                                                        | Algorithm                 |                               |         |
|--------------------------------------------------------|---------------------------|-------------------------------|---------|
|                                                        | CH                        | SA                            | WA      |
| Range of parameter 1                                   | $a1=[0.05:0.05:1]$        | $p1=[0.1:0.1:1; 1.5; 2:1:10]$ | $q1=p1$ |
| Range of parameter 2                                   | $a2=[0.1:0.1:1]$          | $p2=p1$                       | $q2=p1$ |
| Range of parameter 3                                   | $a3=[0.1:0.05:1; 2:1:10]$ | $p3=p1$                       | $q3=p1$ |
| Number of parameter sets for irrigation reservoirs     | 5800                      | 8000                          | 8000    |
| Number of parameter sets for non-irrigation reservoirs | 580                       | 8000                          | 8000    |

**Table S3.** KGE values and their components for the storage and outflow of Glen Canyon Dam (GranD ID 597) were simulated using the DH, CH, SA, and WA algorithms during the calibration (validation) period. The algorithms were calibrated against outflow, storage, storage anomaly, and estimated storage.

| Simulated variable | Calibrated variable | Algorithm | KGE           | $R_{KGE}$    | $V_{KGE}$   | $B_{KGE}$   | $T_{KGE}$    |
|--------------------|---------------------|-----------|---------------|--------------|-------------|-------------|--------------|
| Storage            | —                   | DH        | 0.17 (0.04)   | 0.54 (0.75)  | 1.21 (1.79) | 0.76 (0.90) | 0.38 (0.52)  |
|                    | Outflow             | CH        | 0.17 (0.04)   | 0.54 (0.75)  | 1.21 (1.79) | 0.76 (0.90) | 0.38 (0.52)  |
|                    |                     | SA        | -0.08 (-1.28) | 0.62 (0.81)  | 1.60 (3.18) | 0.54 (0.56) | 0.34 (1.44)  |
|                    |                     | WA        | 0.22 (0.22)   | 0.69 (0.78)  | 1.12 (1.65) | 0.61 (0.70) | 0.41 (1.23)  |
|                    | Storage             | CH        | 0.60 (0.64)   | 0.79 (0.80)  | 1.12 (1.19) | 0.72 (0.76) | 0.84 (1.04)  |
|                    |                     | SA        | 0.58 (-0.51)  | 0.92 (0.20)  | 1.37 (0.91) | 0.84 (0.66) | 1.03 (-0.23) |
|                    |                     | WA        | 0.82 (-0.42)  | 0.92 (0.27)  | 1.09 (0.93) | 0.90 (0.68) | 0.92 (-0.17) |
|                    | Storage anomaly     | CH        | 0.60 (0.64)   | 0.79 (0.80)  | 1.12 (1.19) | 0.72 (0.76) | 0.84 (1.04)  |
|                    |                     | SA        | 0.58 (-0.51)  | 0.92 (0.20)  | 1.37 (0.91) | 0.84 (0.66) | 1.03 (-0.23) |
|                    |                     | WA        | 0.79 (-1.40)  | 0.92 (0.72)  | 1.16 (3.16) | 0.89 (0.35) | 1.00 (1.77)  |
|                    | Estimated storage   | CH        | 0.15 (0.34)   | 0.69 (0.80)  | 1.64 (1.04) | 0.54 (0.50) | 1.08 (0.63)  |
|                    |                     | SA        | 0.30 (-0.74)  | 0.83 (0.66)  | 1.61 (2.33) | 0.73 (0.58) | 0.90 (0.01)  |
|                    |                     | WA        | 0.32 (-2.26)  | 0.91 (0.65)  | 1.58 (3.12) | 0.65 (0.57) | 0.99 (3.41)  |
| Outflow            | Outflow             | DH        | 0.45 (-0.03)  | 0.47 (0.37)  | 1.13 (1.00) | 0.98 (0.90) | 0.95 (1.81)  |
|                    |                     | CH        | 0.45 (-0.03)  | 0.47 (0.37)  | 1.13 (1.00) | 0.98 (0.90) | 0.95 (1.81)  |
|                    |                     | SA        | 0.52 (-0.41)  | 0.53 (-0.11) | 1.03 (0.99) | 1.01 (0.98) | 0.94 (1.87)  |
|                    |                     | WA        | 0.48 (-0.41)  | 0.51 (0.17)  | 1.17 (2.00) | 0.99 (0.95) | 0.95 (0.44)  |
|                    | Storage             | CH        | 0.15 (-1.09)  | 0.30 (0.02)  | 1.48 (2.64) | 0.99 (0.94) | 0.97 (0.15)  |
|                    |                     | SA        | -0.04 (-1.93) | 0.34 (0.09)  | 1.75 (2.93) | 1.00 (0.96) | 0.72 (-1.01) |
|                    |                     | WA        | -0.03 (-1.24) | 0.36 (0.16)  | 1.75 (2.90) | 1.00 (0.92) | 0.69 (0.17)  |
|                    | Storage anomaly     | CH        | 0.15 (-1.09)  | 0.30 (0.02)  | 1.48 (2.64) | 0.99 (0.94) | 0.97 (0.15)  |
|                    |                     | SA        | -0.04 (-1.93) | 0.34 (0.09)  | 1.75 (2.93) | 1.00 (0.96) | 0.72 (-1.01) |
|                    |                     | WA        | -0.04 (-1.63) | 0.36 (0.10)  | 1.74 (2.62) | 1.00 (1.08) | 0.65 (-0.86) |
|                    | Estimated storage   | CH        | -0.03 (-1.95) | 0.28 (0.00)  | 1.74 (3.27) | 1.04 (1.00) | 0.96 (-0.60) |
|                    |                     | SA        | 0.24 (-0.01)  | 0.29 (0.04)  | 1.21 (1.22) | 1.01 (0.95) | 0.81 (1.21)  |
|                    |                     | WA        | 0.31 (-3.56)  | 0.36 (0.08)  | 1.22 (2.35) | 1.01 (1.04) | 0.86 (-3.25) |

**Table S4.** KGE values and their components (excluding the trend component) for remotely sensed absolute storage estimates from the Global Reservoir Storage (GRS) and the GloLakes dataset, compared with storage data from ResOpsUS for 100 studied reservoirs. GloLakes includes data for only 57 of these 100 reservoirs. The comparison period for GRS is from 1999-2018, and for GloLakes it is from 1984-2019. "NA" denotes that data is not available for that reservoir.

| GRanD ID | GRS    |                  |                  |                  | GloLakes |                  |                  |                  |
|----------|--------|------------------|------------------|------------------|----------|------------------|------------------|------------------|
|          | KGE    | R <sub>KGE</sub> | V <sub>KGE</sub> | B <sub>KGE</sub> | KGE      | R <sub>KGE</sub> | V <sub>KGE</sub> | B <sub>KGE</sub> |
| 80       | 0.09   | 0.75             | 0.39             | 0.37             | 0.59     | 0.92             | 0.61             | 1.08             |
| 107      | 0.54   | 0.9              | 0.55             | 0.96             | 0.39     | 0.93             | 0.44             | 1.23             |
| 182      | 0.6    | 0.95             | 0.61             | 1.04             | 0.65     | 0.94             | 0.65             | 1.04             |
| 297      | 0.63   | 0.78             | 0.73             | 1.14             | -2.02    | 0.94             | 0.46             | 3.97             |
| 305      | -43.71 | 0.6              | 0.02             | 45.69            | -28.96   | 0.51             | 0.07             | 30.95            |
| 307      | 0.95   | 0.98             | 1.05             | 0.98             | NA       | NA               | NA               | NA               |
| 355      | -0.06  | 0.64             | 0.49             | 0.14             | 0.33     | 0.68             | 0.42             | 0.9              |
| 541      | 0.52   | 0.89             | 0.53             | 1.01             | 0.22     | 0.91             | 0.47             | 1.57             |
| 597      | 0.93   | 0.99             | 0.95             | 1.05             | 0.37     | 0.99             | 0.91             | 0.38             |
| 610      | 0.85   | 1                | 0.86             | 1.05             | NA       | NA               | NA               | NA               |
| 613      | 0.06   | 0.63             | 1.76             | 0.59             | NA       | NA               | NA               | NA               |
| 616      | 0.54   | 0.64             | 0.73             | 0.91             | 0.33     | 0.54             | 0.54             | 0.84             |
| 629      | 0.03   | 0.12             | 0.64             | 0.83             | -0.13    | 0                | 0.58             | 1.32             |
| 740      | -0.28  | 0.23             | 0.04             | 0.62             | NA       | NA               | NA               | NA               |
| 753      | 0.85   | 0.95             | 0.87             | 0.94             | NA       | NA               | NA               | NA               |
| 758      | -0.65  | -0.36            | 0.41             | 0.28             | NA       | NA               | NA               | NA               |
| 870      | 0.87   | 0.98             | 0.88             | 0.96             | NA       | NA               | NA               | NA               |
| 884      | -0.06  | -0.03            | 1.25             | 1                | NA       | NA               | NA               | NA               |
| 895      | 0.36   | 0.58             | 0.7              | 0.62             | NA       | NA               | NA               | NA               |
| 907      | -0.27  | 0.22             | 0.17             | 0.44             | -0.78    | 0.64             | 0.12             | 2.5              |
| 911      | 0.03   | 0.59             | 0.18             | 0.68             | -1.02    | 0.56             | 0.24             | 2.82             |
| 924      | 0.4    | 0.71             | 0.61             | 0.65             | 0.08     | 0.81             | 0.48             | 1.74             |
| 961      | 0.57   | 0.66             | 0.79             | 0.85             | -0.13    | 0.61             | 0.66             | 2                |
| 965      | 0.38   | 0.63             | 0.54             | 0.83             | -0.56    | 0.67             | 0.22             | 2.31             |
| 968      | 0.56   | 0.68             | 0.72             | 0.89             | 0.42     | 0.79             | 0.51             | 1.22             |
| 972      | 0.79   | 0.86             | 0.86             | 0.97             | 0.33     | 0.62             | 0.49             | 0.79             |
| 981      | 0.52   | 0.85             | 0.55             | 0.89             | 0.09     | 0.69             | 0.29             | 1.49             |
| 989      | 0.43   | 0.63             | 0.71             | 0.67             | -1.49    | 0.68             | 0.38             | 3.39             |
| 991      | -0.01  | 0.59             | 0.14             | 0.66             | 0.05     | 0.58             | 0.15             | 0.98             |
| 998      | 0.92   | 0.99             | 1.05             | 0.93             | 0.49     | 0.98             | 0.78             | 0.54             |
| 1000     | 0.22   | 0.28             | 0.77             | 0.79             | NA       | NA               | NA               | NA               |
| 1006     | 0.48   | 0.58             | 0.71             | 0.9              | 0.18     | 0.61             | 0.54             | 1.56             |
| 1017     | -0.15  | 0.54             | 0.14             | 0.39             | NA       | NA               | NA               | NA               |
| 1019     | -0.01  | 0.26             | 0.32             | 1.02             | NA       | NA               | NA               | NA               |
| 1021     | 0.2    | 0.49             | 0.86             | 0.4              | NA       | NA               | NA               | NA               |
| 1023     | 0.29   | 0.68             | 0.4              | 0.78             | 0.16     | 0.79             | 0.32             | 1.46             |
| 1026     | 0.25   | 0.33             | 0.99             | 0.65             | NA       | NA               | NA               | NA               |
| 1032     | 0.07   | 0.48             | 0.25             | 0.85             | -0.49    | 0.59             | 0.27             | 2.23             |
| 1036     | -0.03  | 0.78             | 0.68             | 0.04             | -0.05    | 0.8              | 0.59             | 1.95             |
| 1042     | -0.1   | 0.66             | 0.64             | 0.02             | -0.1     | 0.66             | 0.58             | 1.96             |
| 1048     | 0.02   | 0.7              | 0.07             | 0.92             | -0.07    | 0.66             | 0.42             | 1.83             |
| 1060     | 0.5    | 0.56             | 0.81             | 0.86             | 0.26     | 0.6              | 0.62             | 1.49             |
| 1077     | 0.28   | 0.61             | 0.56             | 0.58             | NA       | NA               | NA               | NA               |
| 1086     | 0.3    | 0.98             | 0.88             | 0.31             | 0.33     | 0.97             | 0.86             | 0.35             |
| 1093     | -0.14  | 0.39             | 0.14             | 0.57             | NA       | NA               | NA               | NA               |
| 1101     | -0.13  | 0.62             | 0.35             | 0.16             | 0.08     | 0.68             | 0.32             | 1.53             |
| 1120     | 0.9    | 0.95             | 0.93             | 0.94             | NA       | NA               | NA               | NA               |
| 1123     | 0.43   | 0.47             | 0.84             | 0.86             | 0.11     | 0.52             | 0.66             | 1.68             |
| 1135     | 0.28   | 0.62             | 0.46             | 0.72             | 0.08     | 0.58             | 0.38             | 1.54             |
| 1139     | 0.71   | 0.95             | 0.81             | 0.79             | NA       | NA               | NA               | NA               |

|      |        |       |      |       |       |       |      |       |
|------|--------|-------|------|-------|-------|-------|------|-------|
| 1140 | 0.53   | 0.96  | 0.73 | 0.62  | 0.42  | 0.94  | 0.66 | 0.53  |
| 1144 | -0.15  | 0.29  | 0.21 | 0.56  | NA    | NA    | NA   | NA    |
| 1152 | 0.21   | 0.92  | 0.33 | 0.59  | 0.16  | 0.84  | 0.37 | 0.47  |
| 1176 | 0.72   | 0.93  | 0.77 | 0.85  | NA    | NA    | NA   | NA    |
| 1186 | 0.3    | 0.59  | 0.48 | 0.79  | -0.79 | 0.56  | 0.43 | 2.64  |
| 1192 | 0.37   | 0.47  | 0.99 | 0.66  | NA    | NA    | NA   | NA    |
| 1194 | 0.48   | 0.78  | 0.53 | 0.94  | 0.3   | 0.73  | 0.4  | 0.77  |
| 1231 | -0.21  | 0.26  | 0.48 | 0.2   | NA    | NA    | NA   | NA    |
| 1236 | 0.1    | 0.63  | 0.32 | 0.54  | NA    | NA    | NA   | NA    |
| 1242 | 0.53   | 0.99  | 1.18 | 1.43  | 0.3   | 0.92  | 0.66 | 0.39  |
| 1247 | 0.55   | 0.8   | 0.6  | 1.02  | 0.22  | 0.68  | 0.46 | 1.46  |
| 1257 | 0.94   | 0.98  | 0.96 | 0.96  | 0.58  | 0.98  | 0.95 | 0.59  |
| 1266 | 0.5    | 0.64  | 0.7  | 0.84  | NA    | NA    | NA   | NA    |
| 1269 | 0.57   | 0.73  | 0.67 | 1     | NA    | NA    | NA   | NA    |
| 1273 | 0.38   | 0.65  | 0.5  | 0.87  | 0.08  | 0.7   | 0.34 | 1.57  |
| 1277 | 0.35   | 0.6   | 0.49 | 0.95  | 0.35  | 0.72  | 0.44 | 0.81  |
| 1280 | 0.79   | 0.98  | 0.8  | 0.94  | 0.69  | 0.97  | 0.73 | 0.86  |
| 1285 | 0.22   | 0.6   | 0.35 | 0.83  | NA    | NA    | NA   | NA    |
| 1287 | -0.14  | 0.29  | 0.21 | 0.6   | NA    | NA    | NA   | NA    |
| 1294 | 0.84   | 0.98  | 0.93 | 0.85  | 0.81  | 0.97  | 0.82 | 1.03  |
| 1295 | 0.12   | 0.53  | 0.52 | 0.43  | NA    | NA    | NA   | NA    |
| 1296 | 0.51   | 0.69  | 0.64 | 1.13  | 0.17  | 0.71  | 0.28 | 1.29  |
| 1302 | 0.6    | 0.8   | 0.67 | 0.91  | 0.55  | 0.81  | 0.6  | 1     |
| 1316 | 0.47   | 0.96  | 0.5  | 0.82  | 0.31  | 0.94  | 0.49 | 0.53  |
| 1317 | 0.72   | 0.93  | 0.73 | 0.98  | 0.5   | 0.84  | 0.59 | 1.24  |
| 1659 | 0.22   | 0.43  | 0.54 | 0.73  | -0.13 | 0.58  | 0.38 | 1.85  |
| 1709 | 0.25   | 0.42  | 0.63 | 0.71  | NA    | NA    | NA   | NA    |
| 1716 | 0.2    | 0.57  | 0.4  | 0.7   | 0.32  | 0.62  | 0.43 | 0.99  |
| 1753 | -0.15  | 0.14  | 0.59 | 1.65  | NA    | NA    | NA   | NA    |
| 1755 | 0.1    | 0.42  | 0.4  | 0.66  | NA    | NA    | NA   | NA    |
| 1770 | 0.01   | 0.13  | 0.69 | 0.65  | NA    | NA    | NA   | NA    |
| 1774 | 0.39   | 0.78  | 0.53 | 0.67  | -1.94 | 0.78  | 0.52 | 3.89  |
| 1781 | 0.86   | 0.94  | 0.94 | 0.89  | -1.64 | 0.88  | 0.44 | 3.58  |
| 1797 | -0.13  | -0.05 | 1.14 | 1.39  | NA    | NA    | NA   | NA    |
| 1822 | 0.02   | 0.1   | 0.71 | 1.28  | NA    | NA    | NA   | NA    |
| 1824 | -0.49  | -0.13 | 0.04 | 0.96  | -9.86 | 0     | 0.7  | 11.81 |
| 1835 | -0.23  | -0.09 | 0.47 | 1.19  | NA    | NA    | NA   | NA    |
| 1841 | -0.75  | 0.28  | 2.59 | 0.82  | NA    | NA    | NA   | NA    |
| 1847 | -2.15  | -0.18 | 3.92 | 0.98  | -6.88 | -0.03 | 2.85 | 8.59  |
| 1848 | -0.04  | 0.82  | 0.39 | 0.17  | NA    | NA    | NA   | NA    |
| 1862 | 0.23   | 0.37  | 0.61 | 0.82  | NA    | NA    | NA   | NA    |
| 1863 | -0.01  | 0.5   | 1.53 | 0.31  | NA    | NA    | NA   | NA    |
| 1864 | -0.01  | 0.76  | 0.42 | 0.2   | -0.18 | 0.82  | 0.46 | 2.03  |
| 1869 | -0.67  | 0.84  | 0.4  | 2.55  | -0.39 | 0.78  | 0.49 | 2.27  |
| 1883 | -23.35 | 0.06  | 0.13 | 25.32 | NA    | NA    | NA   | NA    |
| 1896 | 0.41   | 0.46  | 0.96 | 0.76  | NA    | NA    | NA   | NA    |
| 7306 | -1.25  | -0.46 | 2.45 | 1.9   | NA    | NA    | NA   | NA    |
| 7311 | -6.62  | 0.71  | 0.79 | 8.61  | -0.21 | 0.74  | 0.32 | 1.97  |
| 7313 | 0.29   | 0.71  | 0.39 | 1.2   | 0.14  | 0.6   | 0.44 | 1.52  |
| 7317 | -0.57  | -0.18 | 1.7  | 1.77  | NA    | NA    | NA   | NA    |

**Table S5.** Number of reservoirs (out of 100) where simulated storage by the SA or WA algorithms reached level(s)—above 70% of capacity, between 70% and 40% of capacity, or below 40% of capacity—in the validation phase that were not observed during calibration.

| Operation algorithm | Calibration variable | Number of reservoirs reaching storage level(s) during validation that were not observed during calibration. |
|---------------------|----------------------|-------------------------------------------------------------------------------------------------------------|
| SA                  | Outflow              | 0                                                                                                           |
|                     | Storage              | 4                                                                                                           |
|                     | Storage anomaly      | 4                                                                                                           |
|                     | Estimated storage    | 4                                                                                                           |
| WA                  | Outflow              | 3                                                                                                           |
|                     | Storage              | 9                                                                                                           |
|                     | Storage anomaly      | 9                                                                                                           |
|                     | Estimated storage    | 8                                                                                                           |

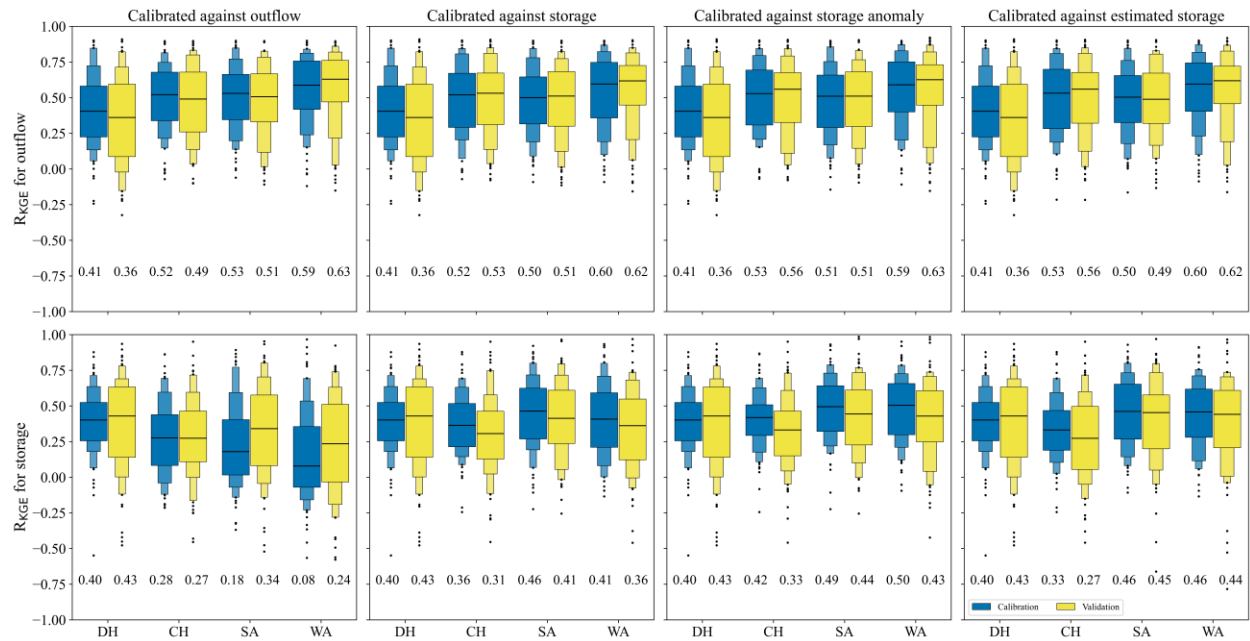

**Figure S1.** Letter-value plots of  $R_{KGE}$  for outflow and storage of 100 studied reservoirs for the DH, CH, SA, and WA schemes for the calibration period (1980-2009) and validation period (2010-2019). All algorithms are calibrated against outflow (first column), storage (second column), storage anomaly (third column), as well as estimated storage (fourth column) using KGE as the objective function. The values at the bottom of the panels are the median  $R_{KGE}$  (indicated by the horizontal line). The widest box contains 50% of the data, the second widest contains 25%, the third widest contains 12.5%, and so on. The inflow data is sourced from the WaterGAP model.

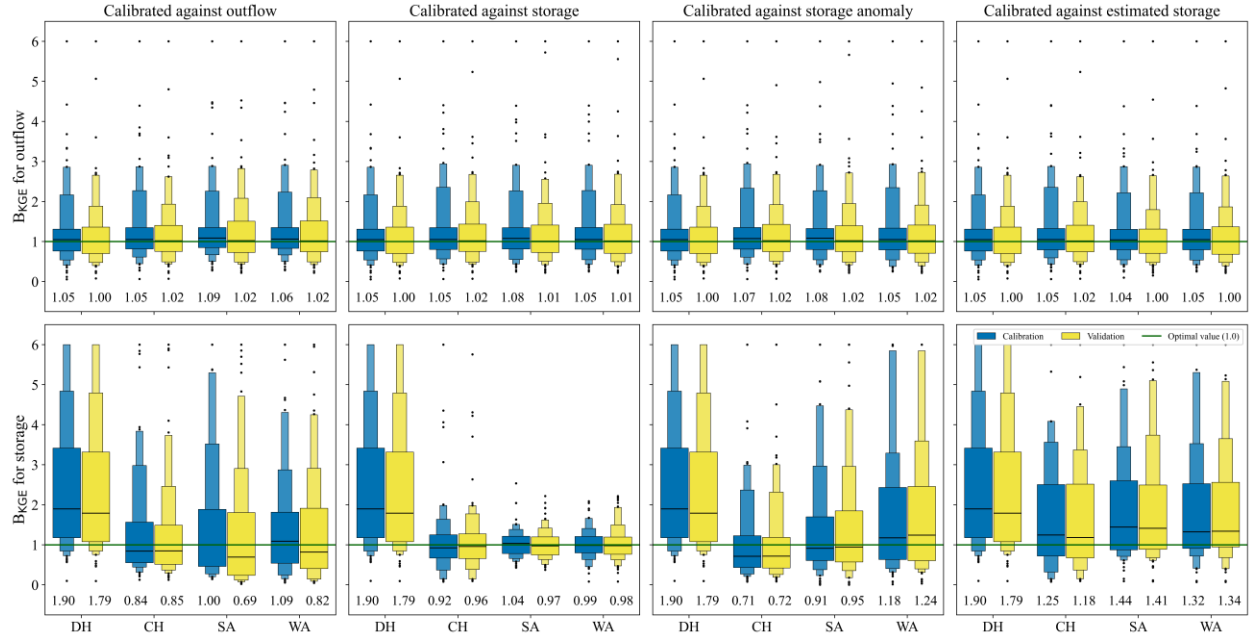

**Figure S2.** Letter-value plots of  $B_{KGE}$  for outflow and storage of 100 studied reservoirs for the DH, CH, SA, and WA algorithms for the calibration period (1980-2009) and validation period (2010-2019). All algorithms are calibrated against outflow (first column), storage (second column), storage anomaly (third column), as well as estimated storage (fourth column) using KGE as the objective function. The green lines represent the optimal value of  $B_{KGE}$ . The values at the bottom of the panels are the median  $B_{KGE}$  (indicated by the horizontal line).  $B_{KGE}$  values greater than 6 are set to 6. The widest box contains 50% of the data, the second widest contains 25%, the third widest contains 12.5%, and so on. The inflow data is sourced from the WaterGAP model.

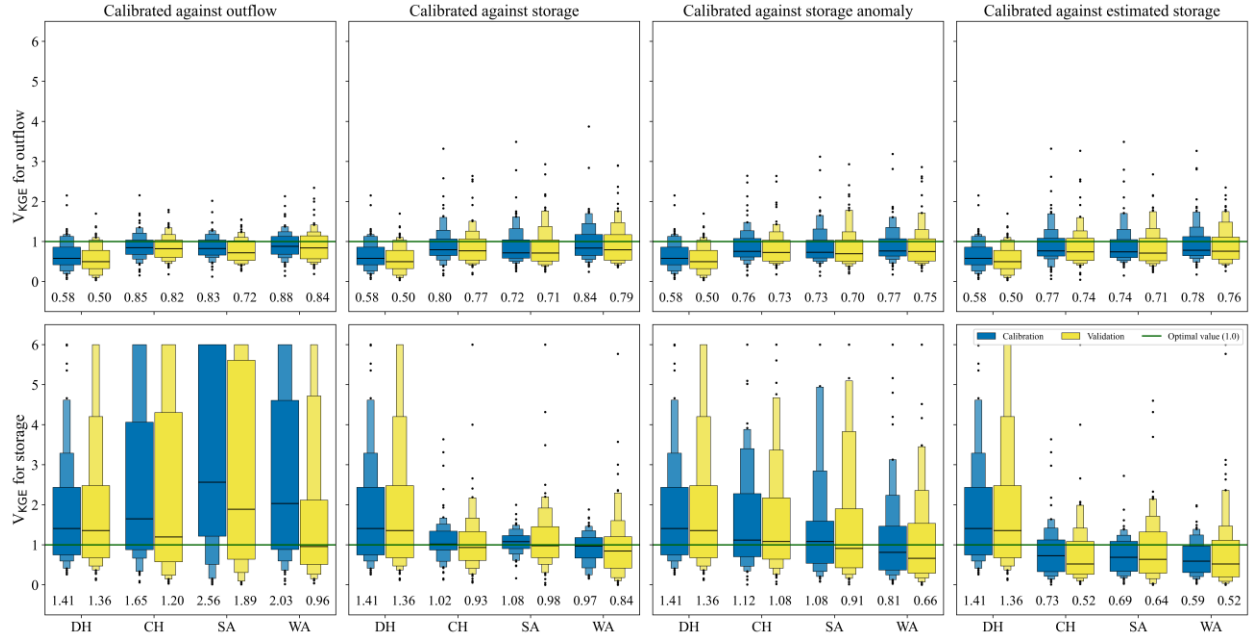

**Figure S3.** Letter-value plots of  $V_{KGE}$  for outflow and storage of 100 studied reservoirs for the DH, CH, SA, and WA algorithms for the calibration period (1980-2009) and validation period (2010-2019). All algorithms are calibrated against outflow (first column), storage (second column), storage anomaly (third column), as well as estimated storage (fourth column) using KGE as the objective function. The green lines represent the optimal value of  $V_{KGE}$ . The values at the bottom of the panels are the median  $V_{KGE}$  (indicated by the horizontal line).  $V_{KGE}$  values greater than 6 are set to 6. The widest box contains 50% of the data, the second widest contains 25%, the third widest contains 12.5%, and so on. The inflow data is sourced from the WaterGAP model.



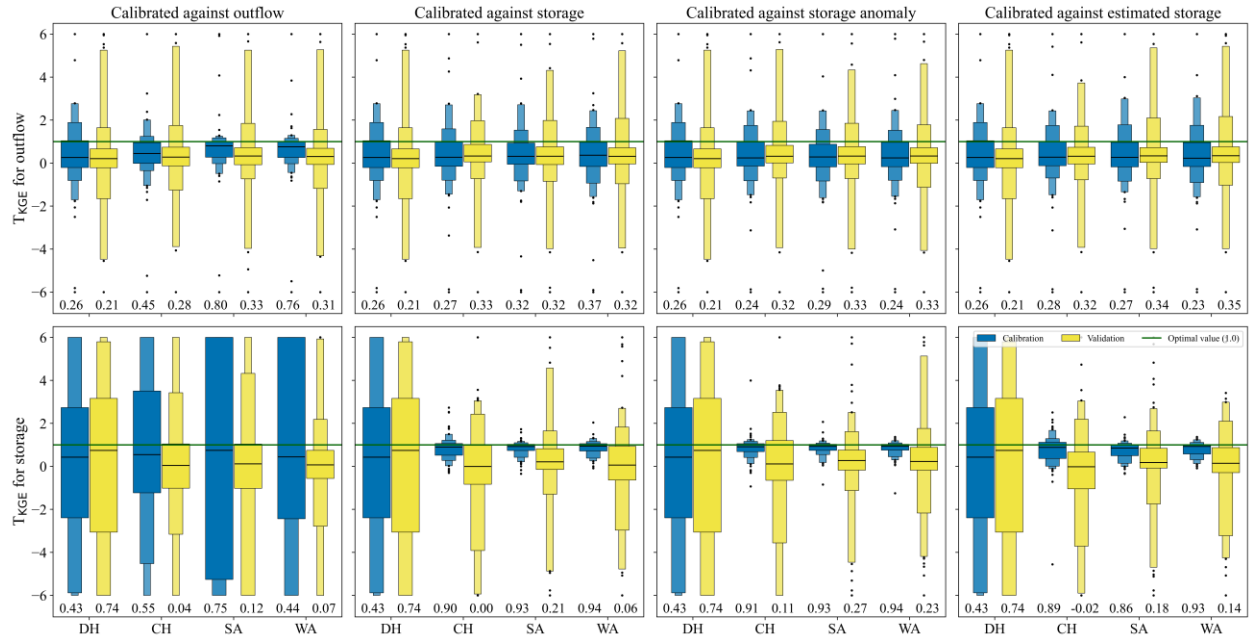

**Figure S4.** Letter-value plots of  $T_{KGE}$  for outflow and storage of 100 studied reservoirs for the DH, CH, SA, and WA algorithms for the calibration period (1980-2009) and validation period (2010-2019). All algorithms are calibrated against outflow (first column), storage (second column), storage anomaly (third column), as well as estimated storage (fourth column) using KGE as the objective function. The green lines represent the optimal value of  $T_{KGE}$ . The values at the bottom of the panels are the median  $T_{KGE}$  (indicated by the horizontal line).  $T_{KGE}$  values greater (less) than 6 (-6) are set to 6 (-6). The widest box contains 50% of the data, the second widest contains 25%, the third widest contains 12.5%, and so on. The inflow data is sourced from the WaterGAP model.

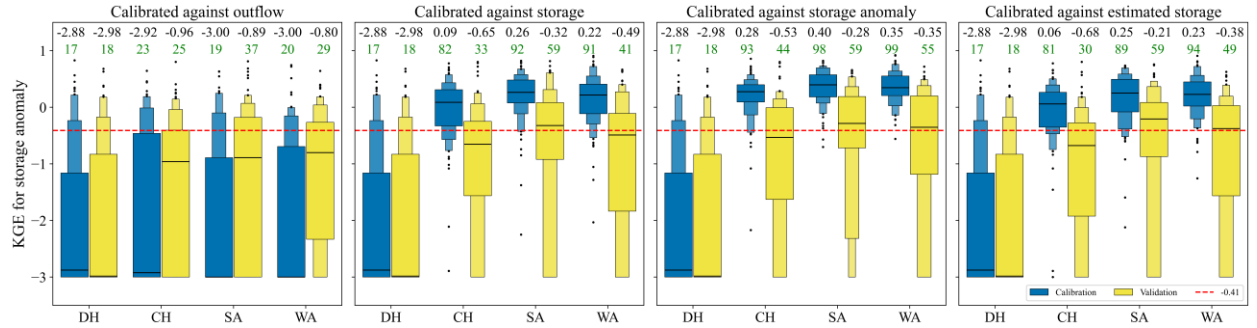

**Figure S5.** Letter-value plots of KGE for storage anomaly of 100 studied reservoirs for the DH, CH, SA, and WA algorithms for the calibration period (1980-2009, in blue) and validation period (2010-2019, in yellow). All algorithms are calibrated against outflow (first column), storage (second column), storage anomaly (third column), as well as estimated storage (fourth column) using KGE as the objective function. The black and green at the top of the panels represent the median KGE (indicated by the horizontal line) and the number of skillful simulations (KGE > -0.41), respectively. The dashed red lines represent the KGE benchmark threshold of -0.41. KGE values less than -3 are set to -3. The widest box contains 50% of the 100 data points, the second widest 25% of the data (12.5% in the upper box and 12.5% in the lower box), the third widest 12.5%, and so on. The inflow data is sourced from the WaterGAP model.

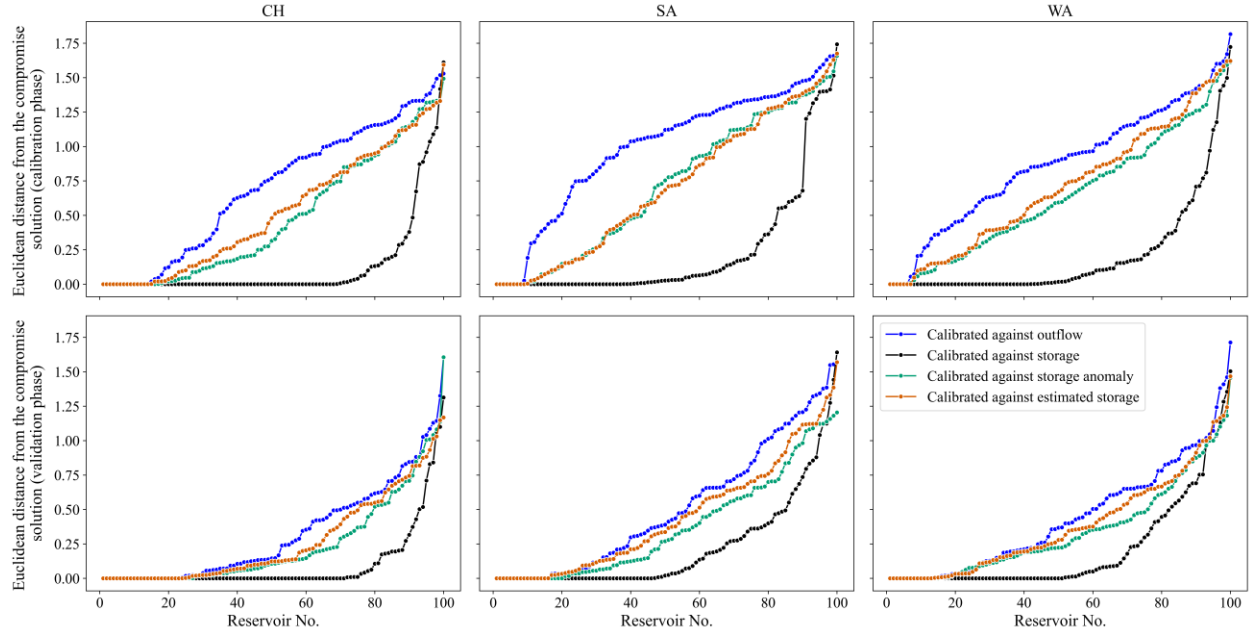

**Figure S6.** The Euclidean distance between the  $KGE_{\text{storage}}$  and  $KGE_{\text{outflow}}$  values obtained from different calibration variants and the  $KGE_{\text{storage}}$  and  $KGE_{\text{outflow}}$  values from the compromise solution for each variant, for the calibration period (first row: 1980-2009) and the validation period (second row: 2010-2019) across 100 studied reservoirs.  $KGE$  values less than -1 are set to -1 before calculating the distance. The compromise solution is defined as the solution with the minimum Euclidean distance from the optimal  $KGE$  value ( $KGE$  equals 1) for both storage and outflow. The inflow data is sourced from the WaterGAP model.

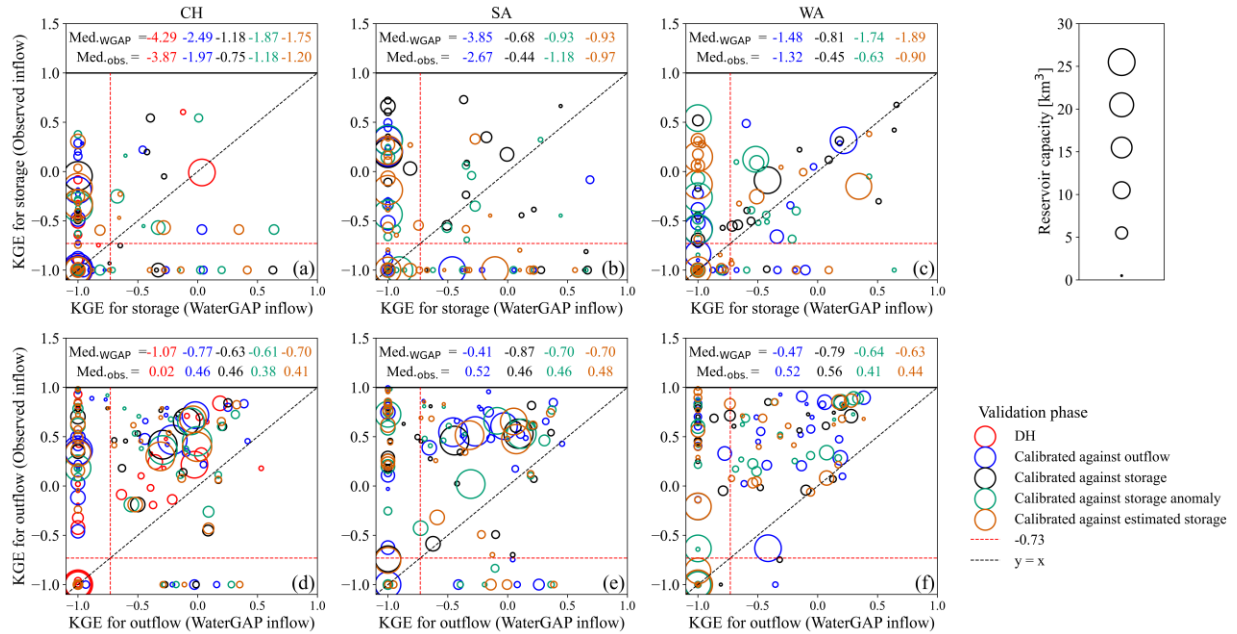

**Figure S7.** The relationship between  $KGE$  of (a-c) storage and (d-f) outflow obtained from modeling reservoirs using WaterGAP inflow and observed inflow for the validation period (2010-2019) for 35 reservoirs with observed inflow out of 100 studied reservoirs.  $KGE$  values less than -1 are set to -1. The  $KGE$  values for storage anomaly and estimated storage were not shown. The circle size indicates the reservoir capacity. The inner values indicate the median  $KGE$ . The dashed red lines indicate the  $KGE$  benchmark threshold of -0.73.

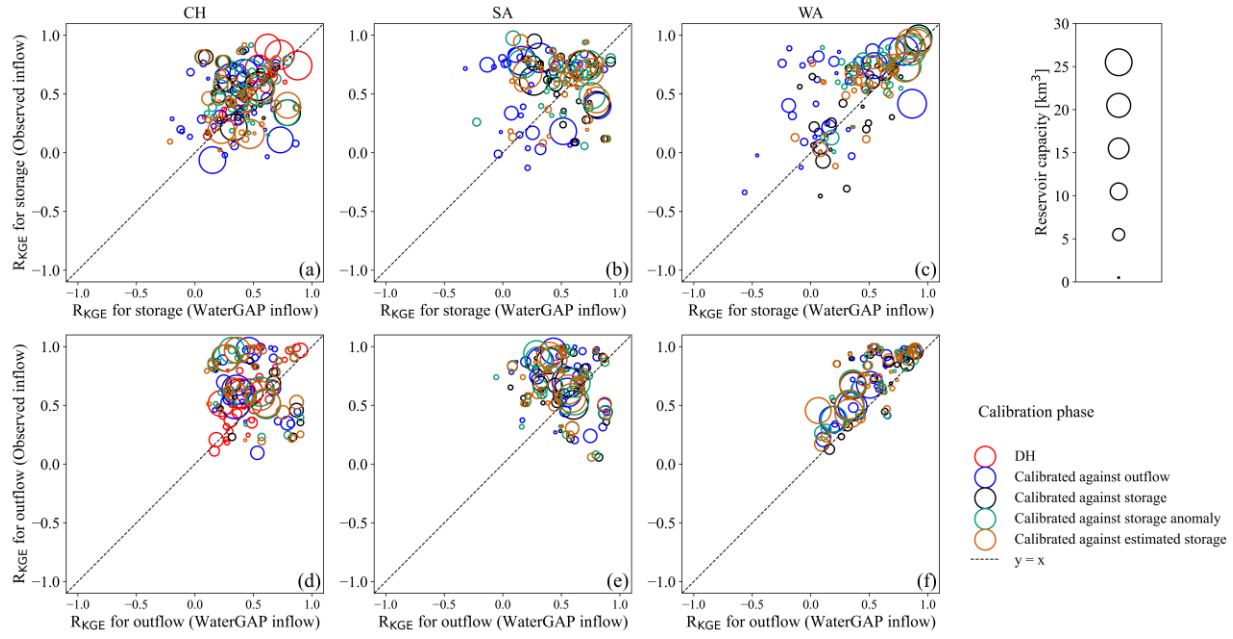

**Figure S8.** The relationship between  $R_{KGE}$  of (a-c) storage and (d-f) outflow obtained from modeling reservoirs using WaterGAP inflow and observed inflow for the calibration period (1980-2009) for 35 reservoirs with observed inflow out of 100 studied reservoirs. The  $R_{KGE}$  values for storage anomaly and estimated storage were not shown. The circle size indicates the reservoir capacity.

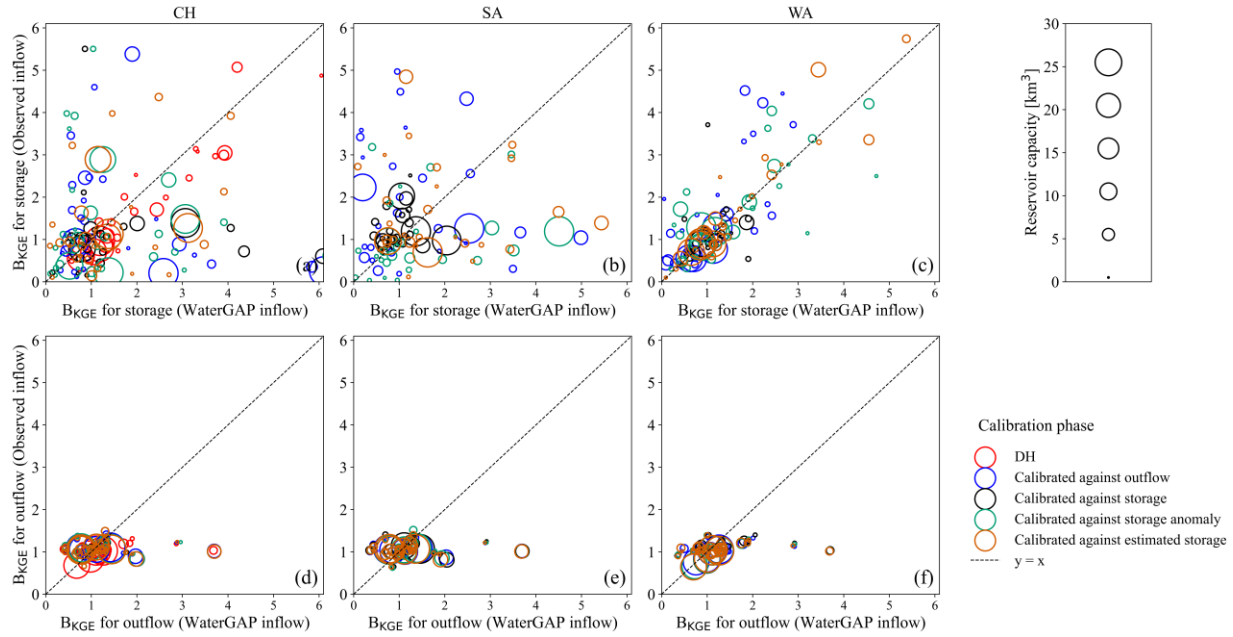

**Figure S9.** The relationship between  $B_{KGE}$  of (a-c) storage and (d-f) outflow obtained from modeling reservoirs using WaterGAP inflow and observed inflow for the calibration period (1980-2009) for 35 reservoirs with observed inflow out of 100 studied reservoirs.  $B_{KGE}$  values greater than 6 are set to 6. The  $B_{KGE}$  values for storage anomaly and estimated storage were not shown. The circle size indicates the reservoir capacity.

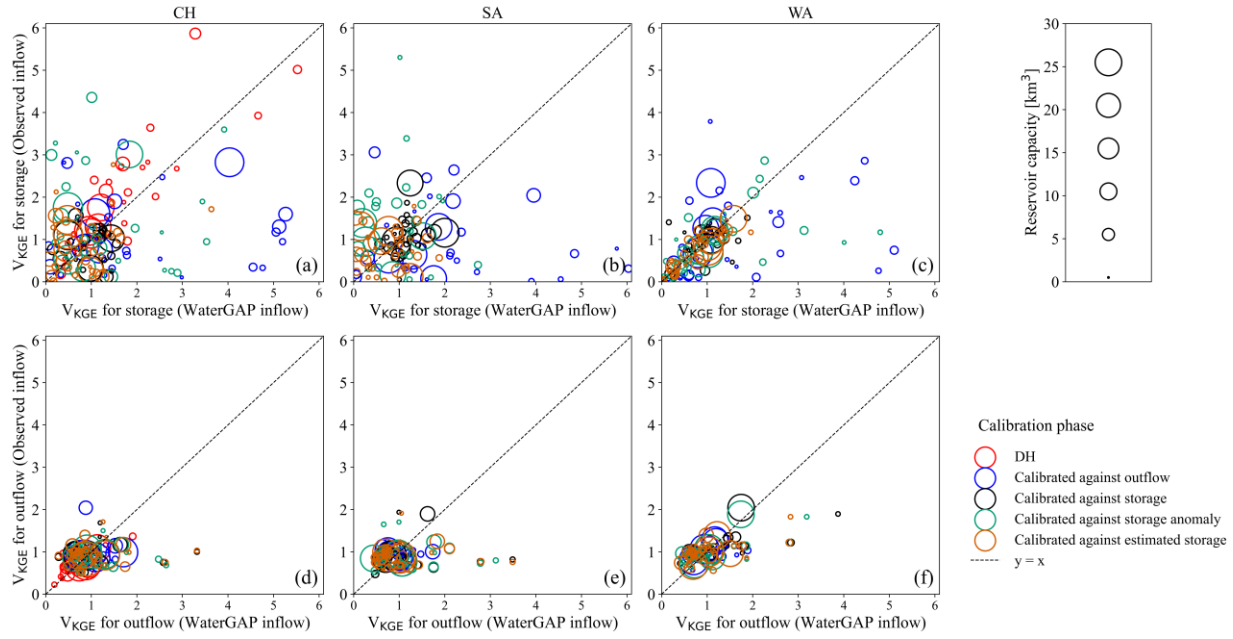

**Figure S10.** The relationship between  $V_{KGE}$  of (a-c) storage and (d-f) outflow obtained from modeling reservoirs using WaterGAP inflow and observed inflow for the calibration period (1980-2009) for 35 reservoirs with observed inflow out of 100 studied reservoirs.  $V_{KGE}$  values greater than 6 are set to 6. The  $V_{KGE}$  values for storage anomaly and estimated storage were not shown. The circle size indicates the reservoir capacity.

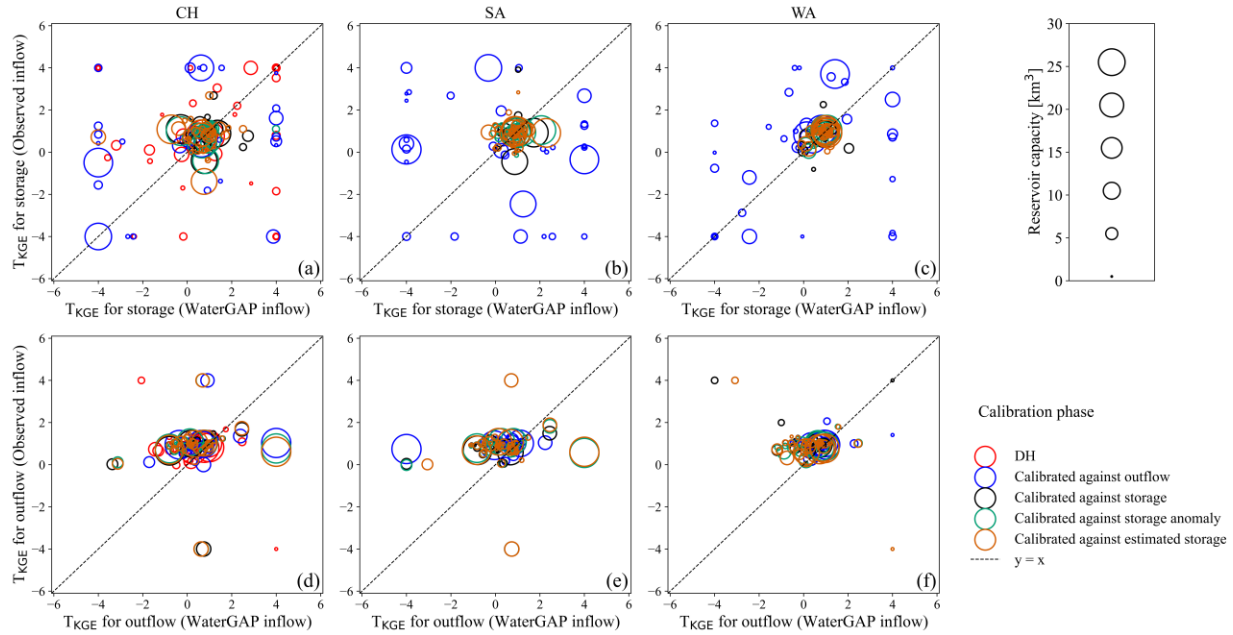

**Figure S11.** The relationship between  $T_{KGE}$  of (a-c) storage and (d-f) outflow obtained from modeling reservoirs using WaterGAP inflow and observed inflow for the calibration period (1980-2009) for 35 reservoirs with observed inflow out of 100 studied reservoirs.  $T_{KGE}$  values greater (less) than 6 (-6) are set to 6 (-6). The  $T_{KGE}$  values for storage anomaly and estimated storage were not shown. The circle size indicates the reservoir capacity.

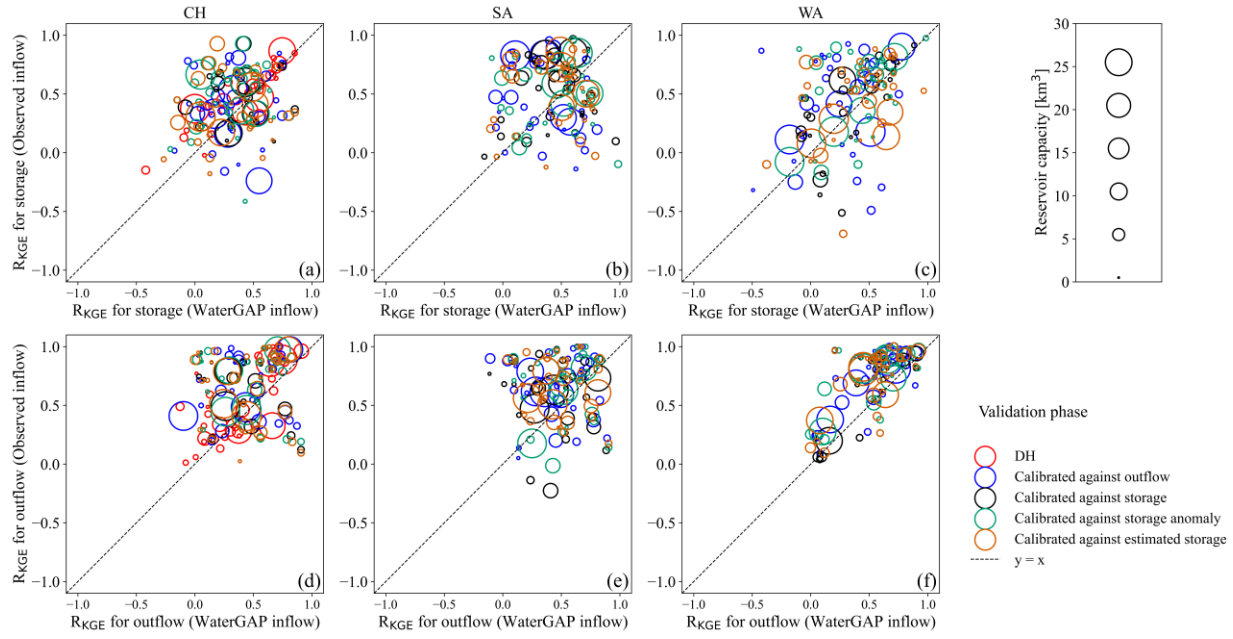

**Figure S12.** The relationship between  $R_{KGE}$  of (a-c) storage and (d-f) outflow obtained from modeling reservoirs using WaterGAP inflow and observed inflow for the validation period (2010-2019) for 35 reservoirs with observed inflow out of 100 studied reservoirs. The  $R_{KGE}$  values for storage anomaly and estimated storage were not shown. The circle size indicates the reservoir capacity.

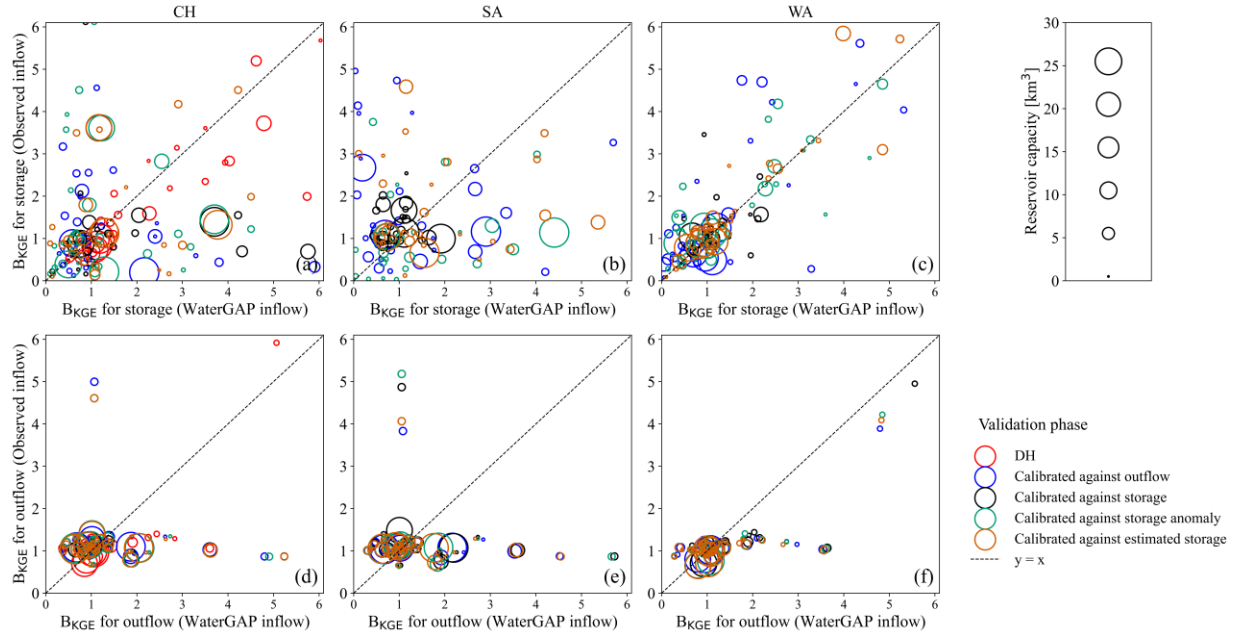

**Figure S13.** The relationship between  $B_{KGE}$  of (a-c) storage and (d-f) outflow obtained from modeling reservoirs using WaterGAP inflow and observed inflow for the validation period (2010-2019) for 35 reservoirs with observed inflow out of 100 studied reservoirs.  $B_{KGE}$  values greater than 6 are set to 6. The  $B_{KGE}$  values for storage anomaly and estimated storage were not shown. The circle size indicates the reservoir capacity.

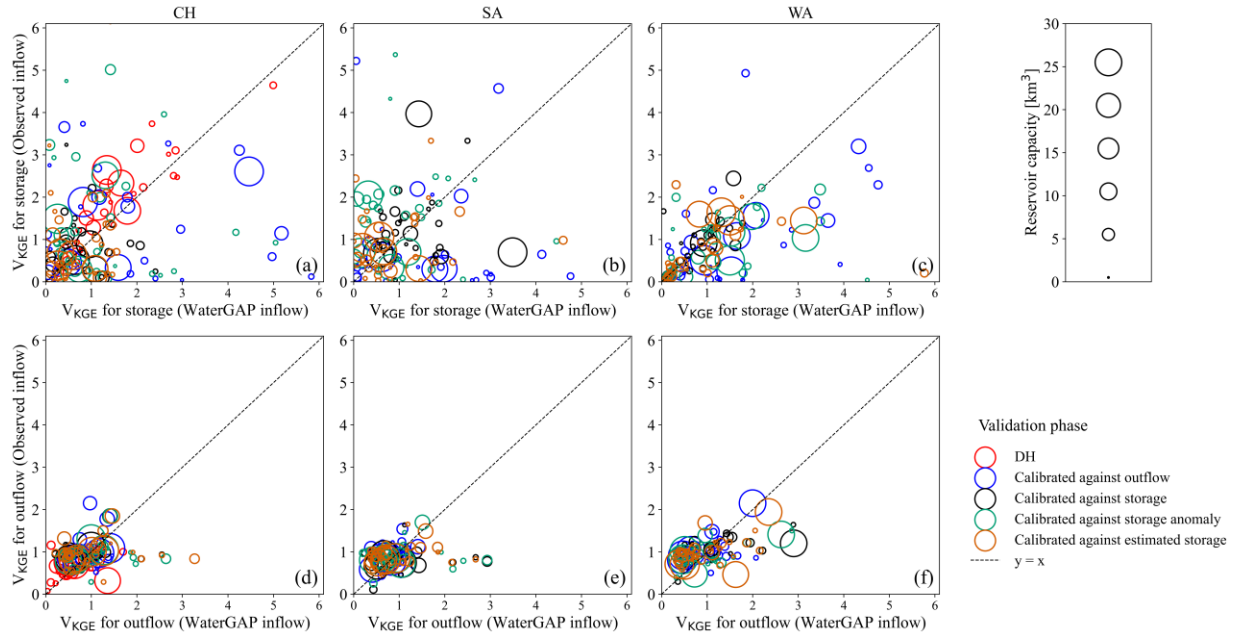

**Figure S14.** The relationship between  $V_{KGE}$  of (a-c) storage and (d-f) outflow obtained from modeling reservoirs using WaterGAP inflow and observed inflow for the validation period (2010-2019) for 35 reservoirs with observed inflow out of 100 studied reservoirs.  $V_{KGE}$  values greater than 6 are set to 6. The  $V_{KGE}$  values for storage anomaly and estimated storage were not shown. The circle size indicates the reservoir capacity.

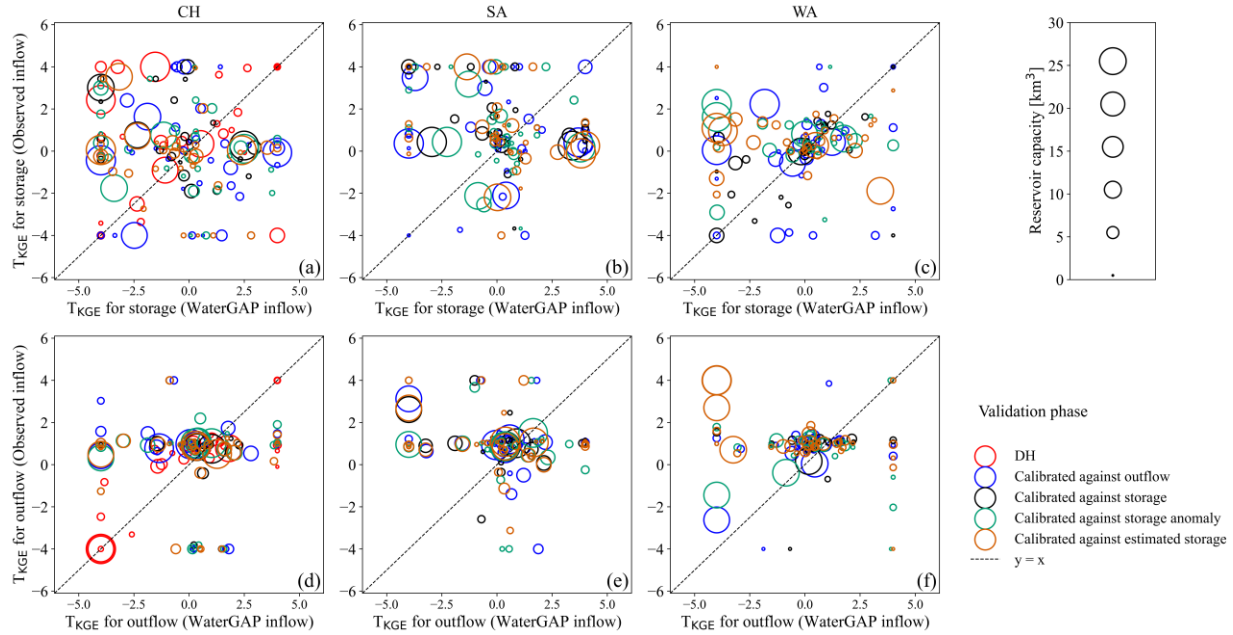

**Figure S15.** The relationship between  $T_{KGE}$  of (a-c) storage and (d-f) outflow obtained from modeling reservoirs using WaterGAP inflow and observed inflow for the validation period (2010-2019) for 35 reservoirs with observed inflow out of 100 studied reservoirs.  $T_{KGE}$  values greater (less) than 6 (-6) are set to 6 (-6). The  $T_{KGE}$  values for storage anomaly and estimated storage were not shown. The circle size indicates the reservoir capacity.



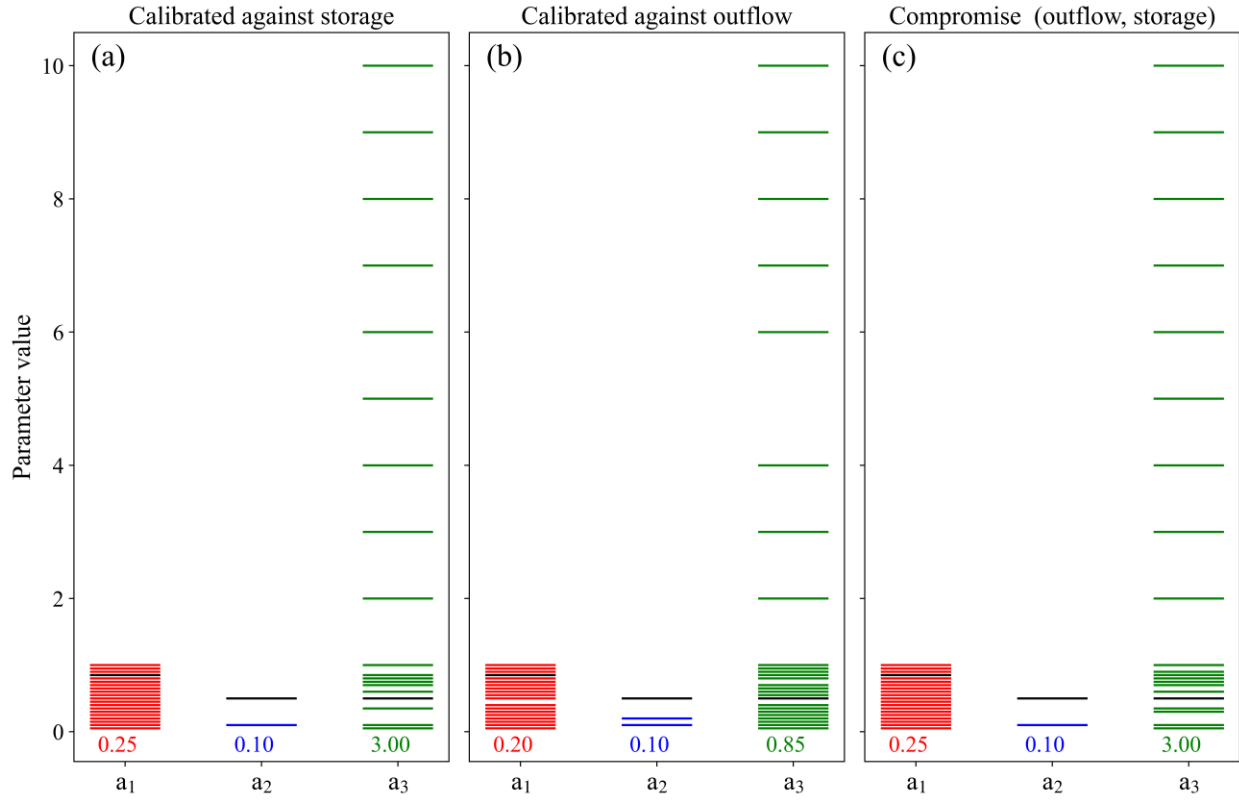

**Figure S16.** The calibrated parameters for the Hanasaki algorithm are compared to default values based on calibration against (a) outflow, (b) storage, and (c) a compromise between outflow and storage. The default values for  $a_1$ ,  $a_2$ , and  $a_3$  are 0.85, 0.5, and 0.5, respectively.  $a_2$  is only included in irrigation reservoirs. The calibrated parameters  $a_1$  and  $a_3$  are obtained from 100 reservoirs, while for  $a_2$  is derived from only nine reservoirs primarily used for irrigation. The values at the bottom of the panels indicate the median KGE for the calibrated parameters.

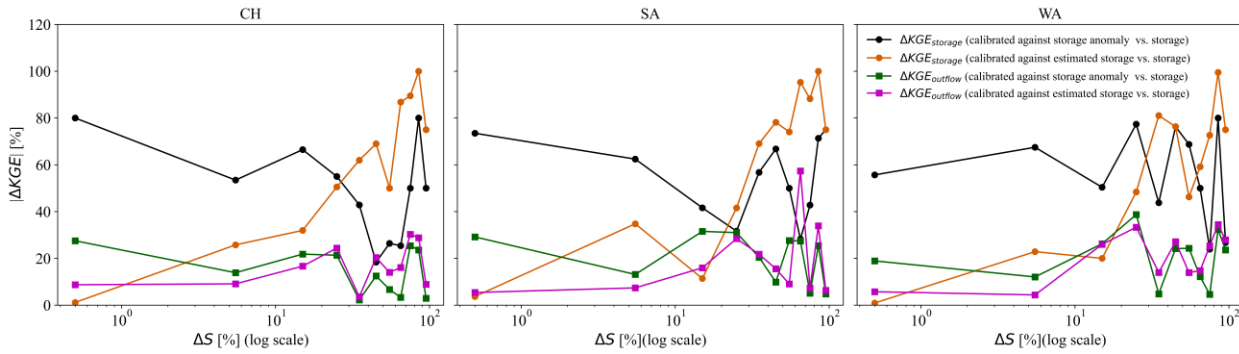

**Figure S17.** Changes in KGE values when calibrated against storage anomaly/estimated storage compared to actual storage, versus differences between reservoir capacities reported by GRanD and observed maximum daily storage. The  $\Delta KGE$  is calculated as the absolute difference between the KGE values obtained from calibrating against storage anomaly/estimated storage and those obtained from calibrating against actual storage, divided by the KGE value from calibration against actual storage.  $\Delta S$  is calculated as the absolute difference between the reservoir capacity and the maximum daily observed storage, divided by the maximum observed daily storage.  $\Delta KGE$  values are averaged over bins of 10% differences in  $\Delta S$ , with differences less than 1% treated as a separate bin. The x-axis has a logarithmic scale.

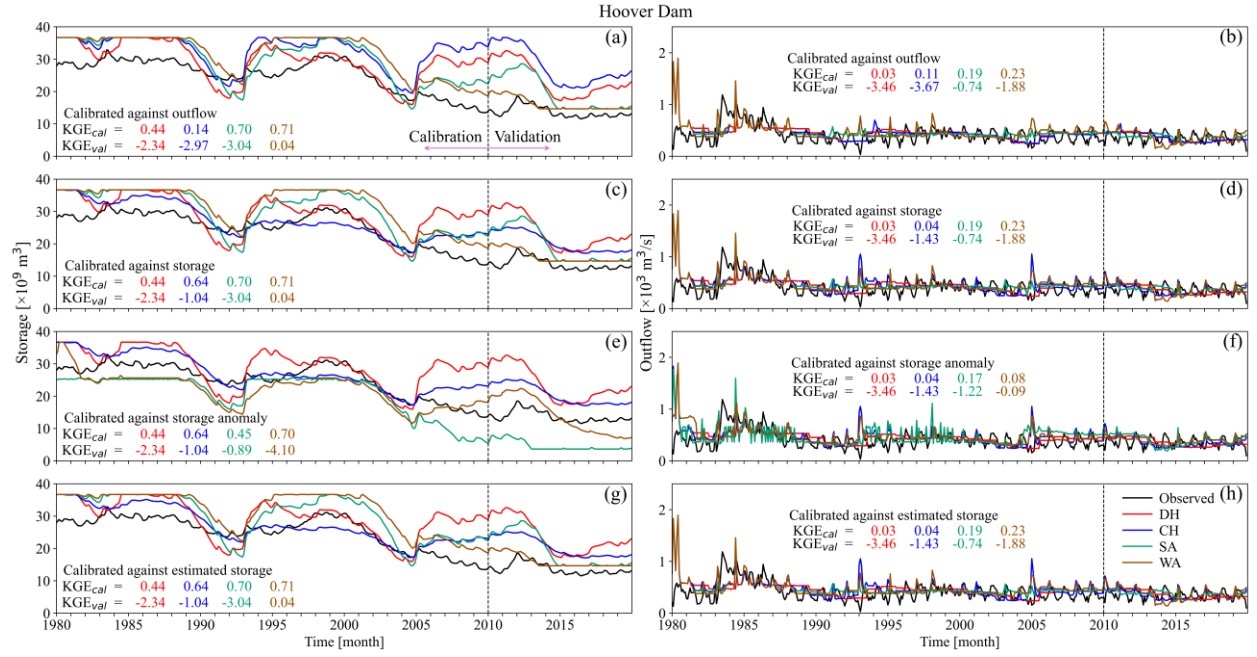

Supplement: Supplementary file 1 [file hess-2024-291-supplement.zip]
