# Supplementary material for: How can observational data be used to improve the modeling of human-managed reservoirs in large-scale hydrological models?
Source: Copernicus journal article supplement (doi:10.5194/hess-2024-291), 2024-10-25
Supplement: Supplementary file 1 [file hess-2024-291-supplement.zip]

## Sheet: Readme
	Sheet name	Note	Inflow source	Total number of reservoirs	Number of reservoirs where downstream demand is taken into account
	Outflow(WG inflow-No Demand)	Simulated outflow (×106 m3/month) where downstream demand is not considered for irrigation and supply reservoirs.	WaterGAP	100	0
	Storage(WG inflow-No Demand)	Simulated storage (×106 m3) where downstream demand is not considered for irrigation and supply reservoirs.	WaterGAP	100	0
	Outflow(WG inflow-With Demand)	Simulated outflow (×106 m3/month) where downstream demand is considered for irrigation and supply reservoirs.	WaterGAP	21	21
	Storage(WG inflow-With Demand)	Simulated storage (×106 m3) where downstream demand is considered for irrigation and supply reservoirs.	WaterGAP	21	21
	Outflow(OBS inflow-No Demand)	Simulated outflow (×106 m3/month) where downstream demand is not considered for irrigation reservoirs.	Observed	35	0
	Storage(OBS inflow-No Demand)	Simulated storage (×106 m3) where downstream demand is not considered for irrigation reservoirs.	Observed	35	0

## Sheet: Outflow(WG inflow-No Demand)
grand_id	p1	p2	p3	1980-01	1980-02	1980-03	1980-04	1980-05	1980-06	1980-07	1980-08	1980-09	1980-10	1980-11	1980-12	1981-01	1981-02	1981-03	1981-04	1981-05	1981-06	1981-07	1981-08	1981-09	1981-10	1981-11	1981-12	1982-01	1982-02	1982-03	1982-04	1982-05	1982-06	1982-07	1982-08	1982-09	1982-10	1982-11	1982-12	1983-01	1983-02	1983-03	1983-04	1983-05	1983-06	1983-07	1983-08	1983-09	1983-10
610	10	0.4	0.8	2186.15	4413.93	3512.37	2254.93	4318.22	4638.65	1988.96	1711.91	953.047	1747.09	1715.19	1748.29	983.479	1652.16	1849.01	1640.14	1729.59	947.935	920.279	955.516	953.753	986.359	953.235	985.022	1010.61	1960.79	973.933	1629.06	944.733	940.961	962.169	968.751	940.697	973.097	940.635	1096.58	965.205	1692.57	1781.16	2503.07	869.07	921.511	1055.91	1029.51	1686.57	1757.92
753	0.5	0.4	0.1	1685.85	1456.33	1652.6	1705.74	1646.49	1833.49	1484.86	1554.3	1631.7	1676.78	1543.5	1661.57	1598.02	1420.84	1657.14	1574.56	1776.44	1559.36	1420.64	1504.65	1565.51	1665.54	1511.52	1571.36	1610.71	1374.45	1756.51	1898.22	1857.36	3320.31	2140.62	1534.35	1605.6	1746.39	1626.53	1781.38	2380.74	1871.61	2368.06	2376.44	3026.16	3278.76	1592.09	1561.58	1606.05	1711.75
870	0.8	0.5	0.5	2299.17	2082.6	2299	2226.85	2122.99	2012.09	1830.62	1855.88	1778.6	2016.15	1974.35	2081.75	2092.83	1853.06	2111.77	1874.53	1972.01	1809.83	1733.46	1756.12	1723.58	1774.13	1710.77	1764.47	1759.49	1585.46	1988.2	2527.07	2704.64	2688.36	2870.32	2895.28	2630.8	2472.68	2420.27	2381.87	2317.76	2039.31	2606.36	2732.29	2649.87	2268.99	2091.95	2218.49	2187.13	2286.82
597	0.3	0.9	0.1	888.395	2270.91	3108.63	3599.92	6398.19	3648.5	843.779	725.251	825.297	835.418	757.078	765.057	750.281	654.99	764.747	924.982	823.263	658.283	582.154	613.257	780.299	1004.27	834.884	716.22	714.275	696.873	912.801	731.489	856.183	1031.96	677.973	736.517	839.916	842.825	762.262	796.635	762.978	764.403	2304.62	2526.59	4198.83	4225.24	1375.62	723.726	774.756	832.103
307	0.2	0.4	0.1	256.607	266.789	302.992	317.215	248.865	308.087	220.424	277.413	294.052	291.866	274.435	279.121	280.078	264.777	291.885	300.769	525.031	1240.66	275.705	277.901	300.108	305.449	291.279	292.976	294.279	290.356	1138.14	2373.57	1640.97	3068.51	772.382	274.433	289.275	507.972	546.012	625.638	672.414	514.204	654.125	692.952	615.255	354.771	267.697	263.617	317.102	315.069
1753	1.5	0.1	0.1	9472.76	8512.38	17281.3	12849.5	6585.84	3392.64	2289.69	1968.04	1961.27	1754.47	2084.37	2152.59	2249.79	7692.4	5649.1	5371.47	2685.61	2892.23	1774.43	1190.43	800.785	841.297	838.466	2289.7	12362.1	11968.7	9519.82	5890.43	3475.68	2655.01	1971.28	2031.99	1637.54	1575.97	1644.99	12943.9	8753.07	9747.19	7769.02	11588.9	11969.6	4648.68	2554.37	1943.07	1947.25	1221.77
297	9	0.6	1	437.017	759.317	1473.93	1846.02	1203.02	602.851	608.3	902.714	721.131	691.871	762.568	872.768	699.757	707.398	612.287	1303.33	1245.58	1473.48	1915.89	866.636	801.37	804.472	688.329	737.59	625.572	1266.17	922.042	1378.67	1417.25	1046.93	754.397	1150.5	1188.17	902.591	716.719	1019.22	385.512	291.863	489.639	996.69	1001.06	957.566	1022.21	941.453	818.177	997.802
1036	6	0.9	0.4	387.794	317.927	327.292	380.602	428.14	257.403	316.329	316.467	303.118	310.986	313.291	306.21	309.35	293.497	288.246	283.023	321.019	278.377	267.694	289.039	273.882	318.021	273.418	316.844	400.555	264.461	217.192	276.561	292.851	401.395	297.76	318.092	298.767	319.518	461.56	908.573	670.822	662.297	761.789	835.865	688.707	592.732	440.605	416.228	393.763	447.873
989	0.9	0.2	0.1	314.79	575.305	1180.86	1147.73	542.172	402.626	280.744	298.578	280.16	295.853	296.395	339.583	274.475	331.815	275.561	275.131	466.336	1670.85	1082.18	1074.24	432.285	419.36	1058.35	789.595	805.019	1466.26	966.895	602.281	890.944	1315.78	751.783	662.258	504.944	417.197	425.892	1374.48	697.08	810.222	820.77	1883.55	1448.29	1261.58	1304.11	414.289	353.271	781.731
1135	9	1.5	0.2	129.692	175.069	133.755	140.213	242.648	200.355	118.44	139.634	260.933	218.325	215.281	459.05	156.822	144.476	452.914	213.162	346.564	283.426	185.306	146.25	140.903	1671.77	739.643	489.073	458.151	498.521	479.565	302.251	1519.23	981.001	1008.44	723.331	346.563	266.64	267.092	274.364	334.176	818.733	623.915	554.876	560.645	406.649	242.988	199.029	139.018	1406.57
1269	0.8	6	0.7	793.737	374.94	405.77	593.51	654.555	360.01	437.136	440.8	420.297	439.744	419.252	422.782	405.712	234.409	226.817	177.243	241.961	550.423	283.987	155.249	184.736	160.619	180.796	184.322	230.232	360.723	318.547	508.925	313.511	316.366	371.577	239.183	142.838	188.395	315.393	832.115	316.502	1181.59	896.053	654.617	817.02	387.101	443.68	447.328	430.346	437.368
1077	0.3	2	0.4	297.685	301.774	207.575	253.676	432.456	178.997	238.571	253.623	242.608	253.488	245.116	289.975	218.271	244.04	300.576	190.477	252.493	266.899	167.554	143.166	106.061	420.852	234.112	214.814	316.865	649.331	466.058	312.245	1474.7	1166.23	575.641	330.815	257.932	264.152	267.22	375.125	264.149	959.987	644.261	688.045	885.195	529.384	337.95	261.888	250.233	1036.03
1026	3	1.5	0.4	205.021	256.817	221.803	152.564	186.521	231.507	156.933	193.981	186.477	199.275	245.493	207.367	211.715	213.317	173.289	168.07	267.134	195.713	148.481	243.235	146.115	293.095	189.533	231.588	559.381	448.938	373.245	187.772	204.064	251.848	176.145	282.661	146.096	195.055	342.776	1027.18	464.784	273.974	245.832	617.58	611.764	196.195	209.009	208.358	201.716	302.356
740	1	5	1.5	79.5197	56.0299	30.2578	16.3493	15.3344	14.4795	15.1782	16.4087	18.4636	18.3677	18.129	18.3714	17.7896	15.8896	17.1019	16.3946	16.1459	17.3565	17.2977	16.2873	16.9563	19.7664	17.8414	18.7042	18.9901	16.7563	17.9648	16.9886	17.256	16.6464	17.1561	16.7693	16.8068	21.0498	18.6716	18.7074	18.3276	16.2668	21.2737	16.6508	16.0242	16.1135	16.656	16.2989	18.51	20.0938
1294	0.3	3	2	33.2506	36.392	37.0884	38.7086	57.2118	25.0941	34.5972	17.342	89.4773	38.8419	54.8732	93.1356	101.676	82.695	270.083	197.183	187.525	487.369	270.183	177.205	166.198	198.923	188.467	165.799	164.245	139.847	155.289	82.9585	103.671	80.6165	70.5701	70.0836	57.9331	71.2575	48.7844	86.7757	90.307	179.926	233.248	99.3241	107.15	84.6802	76.1958	68.1104	56.7722	48.9607
1848	0.6	1	0.9	263.153	120.111	297.12	115.553	131.027	151.619	152.083	152.318	144.423	187.682	345.513	71.2109	180.868	167.367	191.07	86.1803	136.727	188.717	65.3942	22.2695	16.4547	18.3523	14.43	73.9274	257.181	118.771	110.464	197.724	88.2667	130.119	130.237	150.918	68.6116	24.9374	195.723	241.251	100.479	163.503	142.651	306.631	228.053	123.253	181.486	167.358	159.297	171.632
1869	0.7	2	1.5	496.63	285.517	835.498	440.302	451.323	407.115	379.525	345.721	83.4687	43.1379	45.2681	47.5396	69.8324	182.796	286.196	111.799	75.091	42.2369	41.317	30.9799	34.5469	36.689	36.6132	40.7232	181.417	327.511	191.247	603.279	200.652	220.61	40.8901	46.8328	34.1575	38.6058	42.0865	1005.41	482.87	683.394	652.529	865.218	902.15	422.976	443.31	368.106	362.752	92.0968
1863	0.9	0.9	0.7	242.578	91.6269	229.937	90.4002	173.193	131.29	132.361	136.898	151.206	170.181	136.84	119.565	115.653	199.136	98.8515	101.195	93.5498	91.529	86.8897	86.4217	80.4838	86.806	72.6978	241.472	122.38	96.0675	66.2775	157.419	63.9303	89.9781	92.5549	90.8432	83.7779	104.632	173.615	126.302	71.7117	137.187	158.657	104.906	123.49	114.659	122.39	96.3934	94.181	92.2196
1770	0.4	0.5	0.1	161.431	83.1353	218.61	137.923	84.8416	81.4699	87.5917	86.7114	82.1763	83.5325	86.9115	104.44	105.063	128.822	66.0217	96.7447	71.8528	103.274	72.1652	82.4093	79.503	84.2807	93.322	139.434	103.362	77.6883	176.012	85.0521	85.2964	84.62	86.8084	86.1981	83.8093	83.1325	133.371	139.743	79.0691	91.8834	77.6826	118.121	187.883	74.0403	85.669	87.2349	82.9849	86.7821
965	3	1.5	0.1	118.783	110.298	264.028	190.201	184.455	170.321	103.247	14.7629	17.9879	15.4419	19.1814	22.2714	17.3318	22.1604	37.1267	28.6844	85.1714	8.64002	15.1946	29.9325	23.8367	17.4224	22.2342	72.8891	43.1621	188.797	213.152	143.656	354.333	159.026	186.052	184.682	120.809	48.7099	36.7109	45.8553	77.1229	124.796	274.981	195.247	202.935	247.318	154.362	177.394	145.151	34.7823
1247	8	10	0.5	65.8747	95.6639	78.7236	84.8795	119.962	63.2543	69.7064	79.5663	178.979	75.9641	127.851	285.24	76.85	78.7294	218.994	84.9744	81.8184	92.8587	96.8681	91.3508	88.413	907.963	220.281	143.67	160.554	139.986	200.574	83.7055	489.292	369.048	196.361	141.466	85.9312	90.2031	88.5314	97.6853	98.2721	185.598	173.596	83.0371	89.3622	94.9784	82.8464	89.7531	86.9946	90.9689
7313	4	10	0.4	223.223	221.972	490.322	767.924	1056.01	1003.29	139.158	167.747	344.275	223.303	218.289	231.178	222.359	602.59	239.259	633.501	1427.1	925.968	130.119	151.03	228.244	343.883	204.535	229.133	196.409	292.496	1114.01	1623.47	1650.24	1047.67	295.019	181.554	277.767	265.33	414.358	453.818	428.492	418.123	1048.1	1087.16	743.982	533.948	187.438	194.817	235.008	283.32
1287	10	0.4	0.2	498.553	376.451	402.893	433.712	475.648	400.598	415.11	406.228	380.557	499.272	323.455	382.679	233.91	214.315	327.11	286.192	352.349	1042.24	646.983	396.649	398.218	1316.42	627.179	777.848	414.258	467.687	772.361	430.421	1376.5	608.072	418.951	759.286	391.46	407.277	424.307	994.57	375.65	1150.87	1424.41	364.87	841.912	658.101	412.437	421.755	388.916	406.99
1186	0.7	0.6	3	633.801	230.314	336.729	259.42	146.759	32.658	34.2354	26.7683	27.2854	32.3836	31.0269	31.9205	30.2642	28.6251	34.2832	29.8442	47.1448	134.522	55.6465	35.6171	36.8683	42.9733	44.0678	30.0603	42.6021	170.142	23.8834	27.9484	30.6705	44.236	26.273	27.1876	26.3378	31.3201	34.2916	336.017	42.1441	313.46	172.73	25.1794	59.9406	44.4583	34.5871	26.4448	26.5948	30.1093
1042	6	0.9	0.3	41.7371	27.8302	27.4683	17.274	19.7066	21.0606	21.6628	21.6097	20.7907	21.4636	25.6687	20.9638	29.2959	28.5736	23.3761	20.0858	28.5517	20.0547	17.8256	20.8089	20.0005	30.7538	24.0486	20.441	44.1553	19.2131	13.873	21.0798	25.1733	26.7803	18.5169	22.5148	21.0777	22.0918	43.8242	91.654	51.1724	63.3301	81.4049	113.059	62.7974	61.4023	70.3087	69.6122	55.8954	54.8223
884	0.7	0.8	6	2737.23	2620.28	2705.72	2707.67	2748.17	2902.34	2745.52	2228.77	1931.27	2173.8	2150.28	2194.97	2192.27	1849.25	2190.82	2129.58	2170.75	2127.16	2124.51	2081.05	1870.58	1918.84	1873	1917.77	1919.61	1790.23	1952.83	1862.68	1954.61	1875.54	1941.59	2438.51	2135.04	2190.16	2347.95	2174.45	2177.08	2044.88	2403.21	2153.44	2356.39	2147.41	2399.52	2399.96	2356.76	2400.25
1273	10	0.1	9	10.0491	9.51327	9.30574	8.95012	90.4602	6.38096	5.55775	3.9617	49.9769	11.6645	13.987	13.9886	9.12856	8.8576	13.0569	34.766	9.2353	72.0853	7.74099	8.76356	8.5567	149.524	7.29859	10.0248	10.9889	93.434	64.5857	42.7291	268.286	7.75011	9.08411	9.10143	38.7954	9.40429	9.25776	10.7262	72.238	10.0139	65.0015	37.5055	39.3541	8.9685	8.95103	8.9075	9.00824	9.87805
961	0.1	1	0.3	0	0	0	0	0	0	0	0	0	0	0	0	0	0	0	0	0	0	0	0	0	0	0	0	0	0	0	0	0	0	0	0	0	0	0	0	1.27239	1.16773	1.56221	7.29412	12.7169	10.9718	11.9206	12.4284	12.5822	15.305
1144	2	2	0.2	1270.18	1523.05	1229.01	962.122	1316.42	839.11	502.212	426.905	449.034	1314.02	893.087	1395.78	808.655	826.433	1014.39	800.707	921.847	1906.58	1035.25	670.382	670.96	2072.44	1802.32	1287.68	1287.57	2167.04	1537.45	908.881	2388.81	2995.34	1621.35	1024.03	928.046	837.683	970.923	4122.04	1590.32	2049.25	1709.68	1434.47	1777.78	1180.68	1090.86	799.072	682.03	712.496
616	7	10	0.4	1849.33	4161.24	3676.82	2053.06	3886.56	4314.16	2292.11	1805.36	1832.29	1262.72	1824.54	1855.03	1854.19	1198.33	1845.88	1822.96	1266.7	1825.15	1851.26	1238.85	1826.33	1272.35	1821.77	1856.04	1259.94	1787.28	1262.89	1832.69	1261.96	1828.13	1262.92	1181.67	1820.27	1258.66	1238.83	1261.68	1263.18	1199.36	1264.91	1245.18	1265.8	1241.5	1262.31	1260.88	1242.48	1269.38
911	0.9	0.3	0.1	416.792	258.174	433.496	654.24	397.933	404.906	282.262	297.965	293.273	282.831	268.472	281.616	215.373	180.142	162.839	165.599	126.89	117.736	150.521	116.091	104.422	96.8732	121.225	175.259	126.724	417.466	670.337	902.517	1169.31	849.761	941.293	480.105	404.752	440.619	619.691	1068.52	745.326	1094.99	1695.3	2400.67	1373.9	1055.66	1075.06	976.903	672.317	471.402
1006	0.3	1	0.5	55.2342	56.6055	48.0608	29.9826	36.4172	37.082	37.6975	37.4871	35.5688	45.8903	37.4985	40.7699	44.7846	53.5078	30.1284	34.0196	56.0704	48.7062	24.7908	36.0908	33.96	69.6041	31.7236	41.3182	56.1613	27.6261	29.6821	36.9682	44.2155	45.7035	33.1351	68.8342	20.6794	37.6361	64.8278	53.1113	37.7232	37.4732	44.4703	109.461	63.8468	69.7647	64.6555	39.3783	37.9671	99.2569
1048	9	0.8	0.3	393.859	782.803	808.702	1225.92	1532.02	1073.72	756.961	783.457	488.264	371.498	348.706	361.523	328.81	290.212	336.942	283.706	274.496	283.717	245.522	270.531	249.575	259.264	358.135	241.8	291.62	753.5	611.589	382.954	1017.83	1078.12	720.264	769.368	481.107	345.477	297.63	347.069	317.292	507.439	785.162	818.252	918.828	819.275	788.568	775.636	522.988	694.513
1123	4	10	0.4	45.392	27.2994	26.1072	28.5715	34.7489	23.0642	27.7597	27.8199	48.0073	18.3122	23.0442	31.0573	35.0572	34.5356	28.8661	26.0749	43.3966	34.4746	26.2275	30.1348	29.3221	34.9452	40.5652	23.4187	61.8832	24.5181	26.0656	79.9849	328.674	20.3112	26.2018	29.8566	28.799	29.6171	35.8763	143.543	21.1646	39.9985	159.098	25.7741	210.067	21.1226	31.2532	29.3961	28.8458	29.8718
1032	9	0.8	0.2	120.185	204.193	369.028	283.785	270.966	127.614	86.9697	82.7173	79.8445	82.9732	78.984	83.4957	79.9577	81.0758	91.2712	73.4954	106.331	82.2054	66.8656	79.0553	74.1535	86.9543	125.129	102.21	240.889	253.863	188.297	121.938	448.31	332.224	310.782	342.308	140.702	105.793	97.4154	240.602	218.586	355.348	352.8	405.691	404.745	320.169	340.872	266.411	111.809	291.438
1774	10	0.8	2	701.994	593.152	799.879	526.782	520.255	212.881	174.711	155.035	135.87	120.289	101.481	104.058	109.076	315.848	353.356	413.662	256.171	328.124	159.355	116.675	113.607	82.2461	79.888	124.237	562.579	796.605	749.542	544	381.77	201.533	167.439	137.681	191.662	150.347	256.84	557.575	487.313	686.617	560.996	639.268	531.603	263.127	200.113	154.692	132.866	121.872
1781	9	0.3	0.2	358.057	809.384	1671.13	925.701	592.358	180.745	210.931	203.663	195.031	197.271	148.809	145.172	153.416	330.584	664.24	558.053	214.732	475.05	186.442	193.03	185.549	127.604	116.352	187.478	324.8	1448.54	1172.52	545.582	380.162	211.351	215.576	235.123	182.668	212.521	295.05	563.962	658.989	1501.48	1464.17	1388.66	645.335	185.448	215.687	217.042	206.735	211.432
355	10	0.1	0.2	36.6023	154.381	168.406	664.073	689.675	207.598	23.029	35.2059	31.9965	58.7769	56.0187	158.922	153.605	208.58	299.765	329.202	1116.45	275.629	25.6072	33.4061	33.9835	34.0331	60.1005	46.254	36.3917	194.206	157.876	472.263	483.264	387.246	22.3745	34.1862	33.0968	53.5983	57.9512	197.371	330.213	277.838	441.023	837.67	1469.09	469.051	24.049	36.3469	53.5199	195.788
1101	9	1.5	0.4	89.1468	54.9698	391.98	191.586	230.117	161.228	58.743	58.871	57.9726	72.8541	156.165	53.2734	64.4968	80.3074	77.7661	70.1255	67.0714	77.6443	59.443	59.1355	60.6269	65.5997	64.7255	82.6755	126.787	73.9371	51.5083	165.806	79.9522	57.9339	59.4595	65.3479	59.0498	71.2831	99.0941	308.659	215.298	248.041	281.965	384.168	366.286	173.997	174.552	58.7752	60.4092	66.9945
1023	1	10	0.1	336.194	563.924	677.835	1041.76	1062.67	756.49	341.451	220.364	227.098	226.513	129.206	233.464	132.988	232.316	134.073	132.306	234.218	133.915	130.947	130.57	22.5067	26.8177	282.269	27.9272	32.0027	366.926	24.9822	26.1524	166.947	252.913	25.4836	122.163	25.7716	25.9834	26.8173	31.0481	38.8398	41.7864	549.987	665.306	444.214	308.948	232.931	231.884	225.689	131.351
1060	0.5	4	0.3	33.1199	40.7347	44.875	19.0038	32.7903	30.4011	30.2969	30.4222	29.8358	31.2666	37.3082	48.9917	31.0085	45.9167	31.334	28.2317	44.5249	28.4886	27.5545	40.2616	26.1318	52.9299	35.5858	37.2835	247.704	23.6063	24.5453	29.9497	35.1951	52.9806	24.6235	33.3537	31.164	32.4941	71.016	260.12	96.0883	57.7215	32.0715	216.248	36.0378	25.5671	32.3567	34.1469	32.3089	37.7468
1864	1	1.5	0.2	254.733	172.022	486.998	237.462	270.331	261.1	33.5836	33.5202	36.2892	51.8134	56.8441	43.7744	54.0591	124.583	133.383	81.1385	56.387	35.888	34.4459	33.638	34.616	36.8198	36.2763	50.4523	86.7859	113.097	125.989	319.241	101.576	47.1794	34.5396	55.2488	53.8937	93.949	167.891	489.455	192.333	265.772	249.212	447.692	464.989	198.278	237.152	245.035	302.74	106.772
1797	0.4	3	0.2	3626.97	2831.38	5499.15	2947.66	1821.68	1219.54	1114.87	903.395	895.502	914.377	923.341	950.613	1212.19	2844.54	2102.03	2381.58	1078.36	1193.67	568.52	464.559	459.506	463.501	443.042	628.693	3356.44	4144.03	3325.02	1395.64	1356.75	1143.92	1113.3	1155.63	892.428	913.373	1299.4	3540.2	2371.41	3663.62	2879.86	3462.42	2327.66	1470.42	1068.72	891.16	887.718	691.145
305	5	0.4	0.8	1760.33	1521.45	1801.36	1919.7	3329.17	3593.42	1735.99	1062.11	2016.34	1617.34	1674.67	2048.72	1728.68	2321.68	1333.25	2275.38	2920.11	3040.16	1553.19	1018.56	1072.25	1693.75	1720.83	1853.17	1774.44	2798.04	2604.26	3145.43	2877.99	2797.84	1869.22	1019.67	1196.84	2437.14	1743.73	1900.59	1851.86	2342.63	1656.11	2227.98	1949.79	1766.63	1719.5	1367.34	1140.9	1478.57
968	9	6	0.1	44.8427	49.848	217.919	422.011	236.019	111.146	63.7642	59.2507	58.6687	59.5755	57.7453	74.7666	58.1888	57.7043	58.7277	57.8655	152.462	39.2758	54.3826	63.575	40.9802	59.2867	57.9937	59.2455	58.105	62.4135	81.6526	68.4169	125.247	111.583	63.0046	38.4412	39.8282	41.0513	40.2601	24.8579	42.2019	45.2431	112.627	134.172	83.1333	167.527	66.731	57.1223	60.4356	60.0973
1019	0.8	1	0.3	20.7512	18.2449	21.5495	24.4777	18.5893	10.5667	10.915	11.1357	11.0357	11.7129	11.5961	12.3084	12.0332	21.5697	9.94658	11.2044	20.1284	9.04008	9.97553	11.341	10.3773	11.3616	11.1966	11.7217	36.1172	36.6609	25.2083	31.7918	37.491	37.1717	32.5584	11.5606	11.8132	12.1637	13.6456	73.8739	32.4283	33.8613	47.4315	67.6693	30.5999	33.4297	40.1846	40.7072	39.8807	43.1429
1302	5	3	0.3	18.1492	14.2298	16.298	13.0156	19.97	6.06622	14.5191	42.211	23.6947	16.447	21.6941	26.1957	36.861	32.482	74.5729	43.6649	36.3047	223.544	61.5967	23.7061	19.8876	27.7928	23.0597	19.5391	20.5293	16.1112	14.2569	13.9859	21.0656	8.14243	22.977	16.7869	16.2234	16.3754	16.8486	18.3764	18.8052	19.8927	43.9165	16.8104	24.0804	14.6357	16.5643	16.1453	15.9258	16.5049
1824	6	0.8	0.1	8045.84	7018.52	17822.4	8185.47	4697.75	2833.83	2111.62	1872.78	1495.11	1900.37	1773.34	1906.38	2211.47	6612.78	4808.29	4689.98	2206.43	2181.78	1274.92	1111.61	897.442	686.237	691.521	1928.9	11234.7	10543.4	6815.87	4747	2916.64	2123.23	1880.61	1827.65	1619.27	1378.42	1732.34	11190	5912.35	8810.81	6200.08	9914.8	8369.75	3425.51	2275.19	1847.55	1466.81	1365.64
1316	0.1	0.1	0.1	0	0	0	0	0	0	0	0	0	0	0	0	0.330401	0.162748	0.444845	0.44955	0.726133	5.48272	1.284	2.34599	2.50496	4.364	2.09308	2.508	2.26443	2.49289	2.51466	0.681448	5.69921	4.66564	2.76058	1.90996	1.24605	3.56432	1.2726	3.58413	4.57034	4.44864	1.75321	4.31451	0.758888	0.242312	0.127896	0.0271802	1.0622	0.169844
1835	3	4	0.4	6865.49	6530	14307.7	6783.98	4020.44	2285.36	1783.25	1766	1615.75	1529.48	1371.84	1583.66	1771.75	6086.45	3988.21	3792.5	1889.19	1971.52	1360.6	908.138	739.609	636.276	622.868	1811	9207.67	8623.67	6722.22	3400.55	2411.88	1766.96	1805.4	1754.22	1485.3	1338.37	1495.61	8517.18	4921.44	7306.09	5193.26	7669.44	5998.07	2962.01	1726.05	1743.24	1380.61	1188.52
1847	7	1.5	6	5996.28	5021.74	10993.9	5921.01	3047.81	2020.14	1656.63	1395.55	1244.89	1169.91	1173.24	1367.08	1482.92	4965.24	3353.15	3628.45	1638.29	1779.64	975.953	783.368	619.822	559.9	509.083	1374.32	6818.44	7697.04	5623.84	2634.79	1975.14	1675.28	1447.52	1390.69	1234.26	1168.34	1368.88	6696.26	3873.5	5870.58	4492.6	5853.85	4221.55	2365.93	1708.62	1342.02	1134.12	1048.16
1231	5	3	0.3	59.3833	79.6003	64.5712	56.49	46.3778	26.3923	26.9655	27.32	26.9885	29.9305	29.056	29.8559	28.8674	26.2257	30.0809	28.2448	44.5883	127.881	58.5814	26.3798	27.9388	49.2605	78.7563	58.7469	48.34	61.5088	53.5188	44.8332	50.5045	36.1277	28.0142	27.4488	26.8086	29.7905	35.2282	241.492	74.7121	182.147	78.3346	58.7685	56.8982	44.8648	36.335	28.1936	27.3279	29.1387
1140	2	1	0.1	1.2035	0.729677	0.179409	1.88889	1.26896	0.575381	0.674894	0.515178	0.857311	0.295733	1.70632	0.74706	0.745764	0.410235	1.01326	0.512797	1.08979	0.829997	0.660323	0.488911	0.21885	1.72482	0.175642	0.600456	1.74561	0.891633	0.170184	3.22288	2.11045	0.767304	0.228457	0.506638	0.218728	0.171794	1.27096	1.73499	1.7902	1.24459	2.48119	0.704085	0.647467	0.739873	0.687131	0.539853	0.221543	9.98665
1296	0.5	1	1.5	89.1044	28.3009	40.2582	37.792	49.7283	30.7727	35.8216	37.7359	35.5909	35.6492	34.2417	31.5963	6.46952	8.25169	9.63842	6.10269	8.56017	61.3901	12.7233	9.21936	6.13065	31.9633	26.899	16.6142	11.0779	10.7381	11.3272	13.1974	40.04	16.0558	7.62233	6.19483	6.36224	7.42336	11.3932	38.9301	33.1227	40.593	40.596	21.4491	52.2995	20.0258	32.7963	33.3676	16.5378	6.44123
1659	8	0.6	0.2	13.59	24.7585	33.2379	23.7217	27.5162	27.6638	28.3411	29.1985	19.8272	9.28286	10.217	9.95414	13.7627	30.5574	20.6044	41.504	35.5348	22.1751	28.6535	44.5359	26.6131	28.5052	28.6743	33.7808	40.8915	31.642	32.3219	27.5913	31.6136	31.9713	32.143	31.8831	30.4531	31.9825	50.2725	41.9988	27.8079	28.3266	47.5348	29.2172	35.4673	33.2869	31.7434	32.9498	31.4744	46.1908
1277	0.5	1.5	0.2	22.5983	26.1645	23.7001	22.869	34.3988	15.0648	18.7115	2.89282	3.65115	2.41153	4.92503	3.59195	3.30331	8.38116	20.6096	10.099	7.22043	26.8365	15.9861	8.47376	2.81997	2.99273	2.90852	2.82687	3.48623	3.66149	2.98858	3.2949	9.17061	2.29289	2.82488	2.88124	2.79151	2.87261	3.04297	4.7034	4.07112	3.16092	15.7779	6.29067	6.74848	3.32023	2.8814	2.89923	2.78547	2.90335
1021	3	4	0.1	175.09	152.082	219.822	167.262	110.438	55.4221	41.8299	31.0976	19.4539	8.85596	8.70525	20.8496	9.08701	8.21581	9.34209	8.46675	12.6669	9.10553	8.54222	7.70552	7.75649	19.0615	114.753	8.46066	79.0759	190.5	97.8198	36.1228	213.487	128.979	80.1057	51.0508	30.7869	20.122	20.033	20.6661	9.30552	56.5702	395.342	262.423	126.798	122.272	47.8433	42.0149	30.8955	33.2553
1280	10	2	1	65.1809	99.8439	99.1603	83.8848	69.9072	8.33848	7.23986	9.44745	202.637	131.827	115.582	131.034	131.632	95.9414	150.217	98.2327	102.615	97.3354	94.3666	97.5774	90.4767	163.163	52.7798	73.2374	51.9343	50.5076	47.4072	38.9614	54.3328	52.8485	38.1902	30.1715	26.9408	29.8758	29.6421	30.1499	36.305	47.9096	51.6079	37.1613	30.3563	33.2179	20.3159	15.3604	13.9784	18.3038
1120	4	7	5	9.49191	6.29537	7.01315	6.4286	6.76867	6.40518	6.08299	5.97049	5.78749	6.29332	6.19052	6.49815	6.2296	5.59665	6.32508	5.95473	6.22302	6.1748	5.40917	3.28187	2.07358	4.24096	1.744	1.54219	2.23864	2.99055	4.39113	4.68485	14.4535	4.63435	6.14412	6.00148	6.17692	6.40267	6.63362	6.79567	6.76202	6.84985	11.0027	10.981	11.9102	8.59028	6.48968	6.42335	6.21633	75.6902
182	6	0.2	0.4	591.541	630.044	174.832	147.754	38.9808	37.4791	41.4415	39.4139	38.0656	39.9065	38.3713	41.3301	49.0331	63.8915	131.763	117.514	38.438	35.8407	41.78	63.3231	60.3699	65.0101	153.214	184.586	278.014	463.866	413.424	485.732	162.248	78.1212	33.6802	40.3452	40.6107	42.7038	551.723	263.702	516.392	441.396	648.209	348.543	64.5323	80.5979	36.2837	42.6327	41.0736	42.3108
7311	0.4	2	0.1	13.0799	41.3503	61.0502	25.8117	16.971	11.9681	6.72755	6.77667	4.0313	4.22569	4.10211	6.98381	4.23047	3.91707	4.59988	4.2975	5.0036	9.54837	11.542	9.31802	6.55126	9.44955	28.054	13.043	45.4393	27.5188	15.8902	12.9496	76.806	64.0856	22.9595	18.2784	11.9794	12.1212	11.9193	13.7164	24.5383	50.2081	43.2392	91.9076	36.953	25.2376	12.5777	12.1745	9.31603	12.1715
1755	0.4	1.5	1	72.5675	99.2847	101.036	48.1192	79.1243	65.6792	59.2211	15.5844	10.7904	7.01523	12.8806	30.3398	20.3544	112.799	59.2465	91.4443	69.2978	113.201	60.7745	41.5951	15.3755	21.0387	36.8899	80.2026	104.885	76.8986	65.9469	96.0632	78.3066	72.18	77.9041	90.1514	94.0261	14.9538	30.6801	106.31	60.7498	71.5164	73.7746	131.219	132.488	83.1285	86.9873	85.3685	78.29	86.2253
1152	5	0.5	0.9	0	0	0	0	0	0	0	0	0	0	0	0	0	0	0	0	0	0	0	0	0	0	0	0	0	0	0	0	0	0	0	0	0	0	0	0	0	0	0	0	0	0	0	0	0	0
1192	3	2	0.3	247.562	324.161	248.806	263.908	257.767	186.342	138.873	117.729	104.184	109.202	122.493	110.412	109.808	119.18	125.752	121.048	122.976	226.923	154.997	98.8707	88.3015	95.7253	112.327	109.926	118.223	186.677	154.548	128.203	119.673	85.8934	75.1199	76.7735	74.3133	77.7905	79.2187	376.327	220.213	363.018	240.539	177.637	164.294	128.059	116.276	89.6962	74.7863	79.1922
541	9	0.1	5	34.7841	27.2208	25.5863	47.43	1094.55	497.685	182.802	66.5036	65.5584	67.7345	63.7902	62.5503	28.1664	20.8011	20.6314	220.396	340.564	85.463	60.0995	58.7045	53.1251	23.5986	20.0177	19.2118	19.0863	14.7348	15.2291	90.5186	885.656	308.662	63.2529	70.8451	64.8812	65.1743	61.957	36.7877	22.9893	18.0098	18.5575	33.7826	861.534	352.131	81.8904	67.0295	60.3531	68.1252
1822	6	0.5	0.1	4890.23	4208.72	9164.53	3835.75	2510.12	1713.01	1524.48	1242.6	1071.78	1046.68	1039.43	1205.96	1323.5	4474.59	2375.42	3200.73	1503.78	1519.37	819.567	658.399	530.818	501.17	414.922	1207.81	5511.63	6473.1	4248.59	2216.18	1735.5	1435.74	1280.89	1255.56	1160.92	1093.65	1420.86	5371.2	3454.91	5212.76	3727.96	4499.88	3612.93	1747.47	1438.87	1145.86	973.983	949.719
972	2	6	0.1	88.7026	191.824	564.667	354.225	245.45	101.199	73.8377	59.3004	18.4168	33.0896	6.83012	21.0158	7.17719	6.5573	7.74418	7.35616	141.947	5.38253	6.81226	6.70337	19.0645	6.28588	7.65096	8.48713	8.52252	36.6533	68.4584	19.3257	36.7594	38.8839	34.9349	19.3714	18.5038	6.77952	6.67032	7.28113	8.21443	12.7146	108.679	266.512	78.261	62.0365	34.8618	32.5447	16.7079	6.47297
613	9	2	3	147.017	236.725	306.594	718.241	987.32	830.975	350.071	186.974	60.026	88.5346	152.882	116.308	113.539	96.0715	218.18	351.345	302.28	102.321	58.5933	58.6134	58.049	29.8353	27.9918	26.6974	38.7698	67.432	209.249	339.888	668.533	220.726	42.9271	56.3687	58.9613	46.5916	57.803	63.5778	62.7304	72.0417	409.976	481.82	664.663	498.395	65.916	56.6989	55.4105	71.2775
1086	0.2	0.6	0.9	6.02696	5.35165	4.42896	5.12413	1.18333	2.05358	1.87418	5.45516	17.0466	30.429	7.15921	4.60988	4.44414	4.35798	4.78201	4.2915	0.576688	1.55223	10.3519	1.69909	0.178468	2.11953	0.443061	0.443471	0.447611	0.471901	0.391553	0.406726	0.0459472	0.174379	0.231074	1.40997	1.6941	3.09634	0.57338	0.537487	0.69207	0.734442	2.31766	2.65175	0.437453	0.320851	0.137434	0.143742	0.136037	2.26486
1295	0.2	0.1	0.1	26.0283	54.7988	41.284	26.133	33.0749	14.7587	15.5032	15.1974	15.7634	16.5976	18.6215	17.1671	20.5125	15.1535	15.3318	15.3184	19.0329	37.3166	26.6921	15.525	16.0224	19.1233	91.2797	26.9278	35.7306	28.3133	35.3823	77.8018	83.0666	23.771	16.6092	15.7534	15.1728	17.8534	111.531	138.006	69.0335	140.376	119.273	28.125	105.833	23.0592	21.1397	20.9496	16.5173	15.8438
1139	10	0.9	0.2	13.4405	19.5748	5.84719	2.98538	4.13598	2.55027	2.86693	2.96413	19.7243	6.08684	18.4993	14.0358	14.5858	23.4748	14.1922	15.3579	16.3516	16.1824	14.3858	8.31102	3.25453	25.4404	13.1571	14.6867	22.3636	15.7229	16.5139	14.9352	31.5884	18.0733	12.5723	17.4829	16.9717	17.4057	17.508	23.8527	19.8391	17.03	17.4616	16.8364	16.8853	16.3317	15.9627	16.1461	15.3515	27.7874
1862	0.8	5	0.3	732.539	465.839	1315.33	469.005	485.65	429.052	113.462	117.076	113.167	147.069	122.416	100.019	119.597	700.764	253.411	357.372	109.56	127.358	98.0811	101.733	81.5757	32.2646	25.301	82.673	769.298	1333.81	294.387	624.849	62.9685	102.241	105.767	113.255	90.3423	98.893	157.264	836.082	374.658	774.083	640.975	643.533	376.923	91.046	110.903	111.044	110.54	107.418
629	10	0.1	0.2	2029.93	4899.7	3823.54	1991.33	2858.35	4822.51	2556.35	1415.56	1970.85	1420.72	1984.2	1420.69	1999.1	1387.22	2005.2	1359.62	2023.26	1423.47	1953.33	1398.18	1387.63	1953.85	1399.77	1408.84	1952.87	1371.75	1398.36	1989.04	1406.05	1398.16	1432.26	1396.3	1373.6	1374.52	1368.66	1457.58	1395.72	1369.34	1409.29	1381.02	1392.21	844.25	1407.38	1450.8	1377.31	1402.4
1000	2	1.5	0.2	12.6302	58.7234	58.0678	34.8906	19.669	11.526	11.7835	11.7841	11.2767	17.7437	14.5984	46.4403	13.2145	36.0637	20.2717	16.4449	94.1278	96.7134	49.3183	16.8314	11.4888	25.9971	61.3146	50.469	86.0321	64.7858	54.5318	23.4135	37.9181	28.5397	12.3158	32.2329	9.67004	11.4979	19.8544	135.604	80.3645	15.1166	20.0528	149.069	67.4726	29.754	11.8097	11.8875	11.4394	95.2764
7306	3	3	5	7469.98	6267.17	15261	6856.04	4278.03	2529.97	2027.42	1703.35	1476.52	1605.67	1447.41	1657.1	1900.31	6058.89	4127.91	4325.41	2025.76	1971.36	1190.47	981.347	763.644	668.141	610.668	1866.11	9611.73	9059.74	6792.62	3718.15	2566.32	1995.91	1777.46	1685.02	1477.74	1366.18	1444.43	8967.36	5297.49	7309.37	5796.6	8021.87	6603.55	2991.18	2053.33	1640.13	1352.33	1229.52
991	9	0.3	0.2	59.8869	48.8449	278.864	30.9921	76.0915	37.6232	38.1938	38.8668	36.4959	38.2838	35.5423	45.4235	32.4952	37.8942	44.2811	28.2909	50.0318	33.5336	32.7027	38.7577	33.6794	39.8187	52.1729	36.7031	85.1428	280.794	34.9616	33.8773	51.7027	200.267	70.3545	38.9187	38.1535	39.377	37.9093	38.8548	40.1358	56.3112	49.4414	295.397	143.989	89.9134	72.8075	38.3354	37.5989	40.7766
7317	3	3	0.3	61.218	116.256	388.217	80.4217	117.426	25.1391	31.6517	30.7397	29.6291	30.4467	29.4781	32.1807	38.0635	47.0224	27.9299	31.7447	31.2043	31.7399	31.3471	31.1392	29.6972	30.37	31.0776	53.2644	228.777	193.299	77.4349	64.2871	29.8882	31.7316	32.5913	34.1859	32.3112	31.6219	42.9848	214.332	91.1211	187.414	42.5001	226.805	250.818	53.9329	31.7984	32.8728	31.6348	32.4519
998	0.9	1	0.3	190.316	147.79	178.732	269.983	514.745	374.248	184.545	201.233	189.214	184.193	171.828	154.434	126.633	102.408	156.167	100.933	62.0212	46.9656	11.2063	13.1558	10.0059	18.6514	35.0297	39.5941	36.4446	36.3355	46.8268	30.6982	13.1714	34.9789	47.8225	42.3719	42.0374	45.1584	45.4061	48.994	48.3609	47.1695	128.454	222.978	162.288	125.306	48.9727	50.6672	47.425	52.642
1716	7	1.5	0.3	45.2864	44.726	157.518	77.8109	47.9615	35.2217	38.3509	36.6621	35.3071	37.0773	38.7197	50.3764	35.4893	51.0841	27.9583	38.7281	158.224	72.2664	42.8892	38.789	36.7126	38.0633	37.099	65.3182	178.223	187.369	155.831	151.857	50.5279	38.6384	38.377	36.7342	37.9013	38.4551	40.1434	358.286	178.715	153.016	111.93	236.579	214.007	176.563	128.494	39.6158	37.6671	159.908
1896	10	0.1	0.5	564.651	489.885	1303.15	400.529	545.044	50.5252	391.028	48.6526	226.576	473.115	210.181	208.607	206.463	477.167	366.241	194.678	199.594	268.857	204.695	51.4193	215.78	51.4975	205.31	56.4555	673.77	644.166	357.805	633.586	169.901	206.152	198.239	235.258	203.221	253.662	47.5955	565.168	464.402	505.682	682.703	417.864	347.749	225.139	225.408	48.0756	284.789	208.578
1883	0.4	3	0.1	283.87	204.58	456.826	157.943	78.6502	39.8496	33.0585	22.4524	25.2508	11.916	26.482	39.6518	36.7007	299.374	78.6256	43.1831	31.9054	11.0759	23.1003	11.7091	10.9297	12.1601	10.3195	25.8508	331.152	325.636	113.086	133.079	49.4344	42.1456	35.1704	11.5527	22.6648	11.9454	12.9241	163.644	163.829	286.839	289.801	247.434	70.7786	53.3811	21.9112	23.2338	32.5173	11.4489
1285	0.6	0.7	3	40.2636	57.2814	51.9963	37.0936	37.8802	5.25919	4.34338	4.24861	4.11852	4.35837	5.1242	35.8337	5.07576	4.58127	17.3378	11.7885	7.26534	91.0898	26.9515	24.4871	7.04586	10.5296	4.56793	6.99081	4.4173	5.92652	4.49157	6.96504	20.0966	3.14984	4.34024	4.23081	4.08118	4.21894	4.27709	6.67207	27.6194	29.8693	38.1954	10.2927	15.5637	7.4668	5.67749	5.62011	5.34833	4.26846
1266	2	0.2	0.1	9.58951	18.4436	18.0767	13.0203	23.3119	8.92681	6.57471	6.5121	6.24017	6.48294	6.28695	6.51399	6.5112	6.13711	7.39193	6.71879	6.8453	7.44328	7.0413	6.48078	6.25647	6.57456	6.73767	6.79176	6.72369	6.34841	6.88809	6.7982	7.62541	6.15685	6.45026	6.33279	6.09781	6.34912	6.28554	14.6152	23.6731	64.738	58.7577	17.3332	48.3171	11.774	8.41644	10.4957	8.22048	6.49034
1176	0.5	9	1.5	27.3403	88.4101	39.4928	20.6258	14.714	12.217	31.6187	29.1133	111.605	32.6549	282.432	46.5728	59.8034	62.9516	83.9191	62.0072	38.3667	31.966	34.8691	24.0608	16.281	59.422	14.3239	12.6744	22.4204	16.3609	15.3673	11.0031	111.696	72.5216	46.0438	65.9379	57.1721	54.1244	53.6329	31.1867	39.0424	68.3009	41.3369	18.4465	24.9351	35.6987	37.5702	32.7996	15.2447	111.445
924	2	1	0.5	13.9745	29.8525	28.5841	22.256	20.2246	29.4564	18.9416	23.4866	26.0174	29.5666	19.2797	33.0499	17.2718	49.3451	23.6408	31.6831	21.8183	28.0573	64.1932	27.8543	43.9283	30.9228	29.7292	19.527	21.4187	65.1706	42.2961	39.827	67.3672	43.4822	65.8709	42.5192	51.6067	55.5967	58.6237	53.3447	51.974	63.5417	57.2856	50.1912	50.6704	45.8942	46.7639	46.4402	27.9308	24.0787
758	8	0.4	0.1	90.3856	105.898	79.7495	47.0782	48.4177	45.0317	48.398	48.9192	48.2797	80.5963	48.0948	80.6887	49.3267	45.0081	80.1834	47.6947	49.1729	40.5808	49.2836	47.8578	46.524	51.1082	47.3043	48.8766	49.1733	43.8284	48.8514	47.4392	49.0618	51.2874	48.8929	48.1784	47.1568	83.4511	80.1401	80.2463	80.6871	44.4133	79.3149	47.2643	48.3087	47.3172	79.675	47.1985	46.211	49.322
1257	0.1	10	0.1	0	0	0	0	0	0	0	0	0	0	0	0	0	0	0	0	0	0	0	0	0	0	0	0	0	0	0	0	0	0	0	0	0	0	0	0	0	0	0	0	0	0	0	0	0	0
895	2	0.5	0.2	2845.45	2708.3	3093.13	3067.03	3042.78	2791.13	3052.71	2307.67	2183.74	2260.58	2401.03	2244.75	2250.73	2073.91	2251.79	2194.46	2253.13	2188.13	2250.76	2029.83	1925.61	1991.57	1930.14	2034.9	1974.8	1986.26	2061.26	2221.05	2300.8	2378.93	2209.82	2308.88	2381.62	2462.68	2403.33	2447.87	2666.54	2272.58	2747.07	3159.93	3558.57	2887.42	2812.96	2671.53	2798.3	2634.09
1317	0.3	6	0.2	16.5907	25.421	26.7172	26.4151	56.3272	13.6578	17.1191	66.4837	26.4223	24.6735	24.3213	32.2029	21.638	22.3217	24.611	24.7985	34.163	39.2896	19.6042	23.5512	24.781	37.351	18.7309	23.3128	26.0379	22.7709	25.7241	22.5129	24.2704	22.3454	210.211	11.5251	11.7745	12.8093	12.136	12.4494	8.77756	11.3918	10.973	10.0041	8.89936	11.5978	20.9193	7.43309	9.86582	13.8837
1242	10	2	10	13.7238	28.899	27.5314	10.8932	3.33089	2.52382	2.34182	2.65773	359.102	144.546	70.1415	61.7368	50.0468	36.7436	38.9813	39.0313	20.604	20.6746	30.7278	38.2459	41.2502	19.1499	27.0582	14.2632	16.8229	12.0233	9.61415	4.32029	3.37631	2.12667	2.7796	1.69045	1.68313	1.38922	1.88031	14.3327	119.429	112.673	26.5871	44.4006	9.1524	23.7082	22.7196	2.82327	1.27011	11.987
107	4	0.3	1	96.2388	98.3047	116.702	71.6117	27.3581	28.2477	29.3987	28.7545	27.0294	27.0834	29.2847	53.8525	34.1191	28.6383	62.1351	23.9987	29.8824	27.7534	29.2692	28.6558	26.8039	27.156	61.5584	266.549	199.494	236.011	138.952	91.7868	28.0043	29.4904	30.2029	29.6584	28.0075	28.2969	37.9861	129.396	197.68	225.684	220.212	59.6882	52.1581	28.5429	30.1232	29.6291	28.0202	28.242
1841	0.4	7	4	121.374	160.651	403.338	180.53	100.731	40.212	26.2469	26.2147	27.0213	25.1983	31.9491	23.4208	18.7667	114.877	123.821	22.0916	25.9598	28.6916	24.3483	26.0728	23.2093	17.1041	6.36679	38.2796	260.811	268.48	121.313	69.2128	31.9543	33.9967	26.455	26.3153	23.1318	25.063	38.3439	202.178	87.367	135.457	98.1653	116.413	102.914	47	31.3697	25.9975	25.4374	25.3294
907	1	0.3	0.1	162.371	215.498	292.471	239.638	157.092	127.467	92.7847	98.6243	106.471	94.9056	90.9627	92.5743	88.9927	98.0357	82.2562	97.4411	80.3781	82.0121	75.8039	69.6276	66.7015	66.2561	74.8322	66.7585	63.2396	110.724	301.09	347.874	411.24	363.713	353.842	200.305	141.723	127.081	203.454	386.712	282.112	369.084	542.619	867.408	538.619	353.478	365.96	211.432	143.487	215.402
80	0.3	0.8	0.5	187.599	280.991	312.657	214.229	112.97	104.393	81.1877	124.2	205.96	123.317	158.696	235.085	165.766	313.745	232.505	200.363	205.455	169.913	78.6373	101.5	68.4021	87.1816	126.728	246.175	252.749	559.628	352.711	340.021	121.88	109.787	83.4844	104.737	263.353	178.379	133.982	243.121	334.053	531.428	473.327	164.291	163.691	111.726	110.168	113.199	83.2993	253.228
1236	0.2	0.1	2	1.14036	1.51829	1.61851	1.52486	1.73614	1.6003	25.0575	23.9477	24.4271	26.2524	24.556	17.7288	4.55008	5.04465	9.31749	8.8237	7.70712	7.26007	6.13554	4.68125	4.03881	33.3614	14.7831	11.4237	10.6306	9.92286	12.1483	10.5633	12.3473	19.2801	10.1728	9.56928	7.94473	7.44652	5.49147	5.71614	5.29997	4.95643	8.51877	9.58431	9.28573	7.58662	5.38368	4.63389	3.31446	2.21459
981	3	0.1	0.2	115.741	144.804	278.026	406.24	254.564	120.601	117.019	118.408	105.903	106.788	106.464	107.063	95.189	105.956	95.2343	106.673	113.347	77.2799	20.7623	23.2267	11.693	12.1867	12.3337	12.8968	13.1701	61.7044	12.1579	10.2607	25.1643	28.116	29.7764	47.0094	35.4024	35.9081	23.8329	36.0207	36.1297	56.0995	56.4601	73.8304	56.9961	45.9356	66.6774	59.1617	70.6932	59.6045
1093	0.6	3	1.5	20.1209	27.9388	32.0642	32.0924	37.1708	26.7242	15.2992	10.8614	12.5966	11.7949	11.2953	28.0328	23.3952	58.8706	38.0949	35.5094	66.4128	88.5785	41.2034	30.6044	21.8668	22.258	22.9149	22.6566	137.23	63.6872	87.8137	86.3044	101.927	79.7184	42.5634	30.5569	21.9603	20.5555	19.1218	138.844	62.1107	75.6336	62.5225	53.2879	143.998	69.7369	59.6581	21.433	16.5418	12.5906
1709	7	0.5	0.4	71.3676	43.6638	115.692	118.872	72.7136	43.5332	51.9793	49.6899	41.7322	44.3329	48.8763	35.2583	44.4706	45.8566	46.0025	43.2265	54.298	158.395	41.0396	41.5822	44.8836	52.2531	33.7159	49.3193	58.8473	83.944	229.426	36.6237	53.6605	54.3693	47.9479	46.402	43.8863	46.7057	59.4706	52.4557	49.5605	49.7701	53.1315	105.362	117.225	42.8934	97.3847	42.7849	42.3056	45.7116
1017	1	1.5	0.1	13.7181	72.8528	91.1519	32.2843	20.107	9.28972	7.08129	7.11481	6.88415	7.11699	7.78109	6.78454	8.56126	11.9482	6.33101	15.8634	52.2569	39.9276	22.4252	5.63863	6.76076	7.39371	8.01131	9.59711	131.901	105.405	85.2339	112.634	72.0783	14.4792	10.2921	43.0261	15.3082	25.9879	56.972	261.462	84.3188	81.2237	102.873	143.117	81.0224	80.4288	107.544	111.229	10.1123	7.33589
1194	7	0.4	5	10.0165	11.496	15.786	12.4968	10.0755	9.39444	9.46406	9.48539	9.7482	14.5327	9.51885	11.7958	9.52135	8.70821	11.4653	9.92535	10.0236	9.90411	9.53636	9.4371	9.3025	115.899	40.6513	26.8493	21.7113	29.6516	24.3195	20.7003	88.3898	42.2457	27.9389	20.4838	17.4399	12.4539	12.2964	10.1109	10.2661	9.89208	10.9718	10.303	10.0921	9.91205	9.64456	9.52171	9.12715	9.59163
[truncated: 434 more columns]

## Sheet: Storage(WG inflow-No Demand)
grand_id	p1	p2	p3	1980-01	1980-02	1980-03	1980-04	1980-05	1980-06	1980-07	1980-08	1980-09	1980-10	1980-11	1980-12	1981-01	1981-02	1981-03	1981-04	1981-05	1981-06	1981-07	1981-08	1981-09	1981-10	1981-11	1981-12	1982-01	1982-02	1982-03	1982-04	1982-05	1982-06	1982-07	1982-08	1982-09	1982-10	1982-11	1982-12	1983-01	1983-02	1983-03	1983-04	1983-05	1983-06	1983-07	1983-08	1983-09	1983-10
610	10	0.4	0.8	25117.5	25128.4	25331.7	25286.1	25191.1	25285	25350	25307.6	25357.8	25202.6	25244.3	25318	25347.2	25170.1	25272.7	25275.3	25312.8	25269.6	25593.3	25606.7	25519.1	25450.7	25401.2	25362.5	25336.1	25319.5	25221.4	25124.4	25138.9	25021.1	24861.2	24675.2	24520.4	24399.4	24313.9	24389.8	24779.5	25328.2	25282	25253.6	25245.2	25247.9	25138	25372.1	25171.4	25360.8
753	0.5	0.4	0.1	27696.6	27833.4	28014.6	28448.9	29471.2	30180.6	30160.1	29678.6	28995.1	28454.3	28102.5	27754.8	27550	27379.4	27194.6	27117.9	27246.5	28525	29030.3	28612.9	27938.3	27342.7	26940.8	26589.4	26293.3	26102.8	25988.9	26997.2	29431.5	30220	30219.9	30126.5	29832.7	29732	29899.6	30145.7	30220	30220	30220	30220	30220	30220	30196	29798.1	29222.7	28806.7
870	0.8	0.5	0.5	20298.1	20301.2	20300.6	20300.1	20302.7	20302.5	20306.4	20301	20300.6	20304.6	20301	20300.8	20301.5	20300.3	20303.4	20301.2	20296.5	20283.2	20253.2	20093.1	19748	19511.2	19329.9	19208	19081.2	18933.1	18821.4	19874.6	21425.6	22014.5	21734.2	21110.1	20503.1	20298.6	20300.4	20301.3	20302.4	20300.9	20300.2	20302.2	20308.5	20303.5	20301.2	20304	20302.6	20302.1
597	0.3	0.9	0.1	24283.2	24958.1	25070	25070	25070	25070	25049.1	24713.8	24234.1	23999.5	24046.9	24141.4	24158.7	24021.2	23722.1	23482.8	24112.4	24799.6	24546.9	23802.6	22910.8	21932.3	21261	20974.1	20696.1	20413.8	20498.1	21311.5	22827.7	24817.2	25006.9	24519.3	23914	23589	23592.4	23768.7	23970.2	24268.8	24952	25070	25070	25070	25070	25007.9	24788.2	24702
307	0.2	0.4	0.1	20981.2	20873.2	20821.4	20956	21202.7	21364.6	21404.6	21020.6	20723.8	20614.3	20624.1	20653.6	20693.4	20723.8	20851.6	21274.2	22150.4	23560	23525	23257.5	22968.2	22884.2	22967.6	23092.7	23212.3	23330.5	23556.1	23560	23560	23560	23560	23543.4	23524.3	23559.2	23560	23560	23560	23560	23560	23560	23560	23550.5	23422.4	23073	22684.9	22545.7
1753	1.5	0.1	0.1	4927.14	5068.46	5745.22	7080.35	5128.91	5098.8	5092.94	5095.95	5054.09	5072.79	5067.24	5047.28	5053.94	5008.28	5091.59	5058.62	5122.77	5040.92	5108.85	5074.29	5154.36	5237.14	5206.41	4953.91	4951.66	5451.07	5163.28	5072.76	5103.64	5087.26	5060.57	5066.95	5091.67	5083.11	5039	4865.32	5085.69	5017.04	5094.23	5012.72	5051.82	5118.65	5078.36	5087.41	5088.08	5073.39
297	9	0.6	1	3456.65	3025.23	1969.72	1180.59	2042.66	3722.08	4234.23	4180.48	4222.35	4149.51	3955.86	3718.54	3434.68	3284.61	3164.9	2901.78	3105.12	4724.08	4992.59	4944.89	4710.24	4476.06	4205.5	3807.25	3414.15	2748.79	1904.43	1220.99	943.579	1992.33	2802.13	2516.22	2101.74	1938.25	1634.94	1070.18	729.125	725.878	725.561	714.342	891.355	1524.46	2096.84	2141.49	1768.15	1314.17
1036	6	0.9	0.4	2010.25	2174.43	2408.15	2630.19	2652.02	2650.52	2565.2	2440.26	2318.14	2208.92	2105.4	2022.91	1950.27	1890.99	1870.79	1820.3	1768.34	1755.06	1717.07	1642.83	1553.05	1457.83	1427.85	1409.83	1409.62	1761.09	2009.08	1988.45	1912.24	1882.92	2028.04	2181.25	2333.54	2462.53	2586.01	3091.84	3284.26	3134.54	2928.4	2746.59	2784.16	2704.71	2651.14	2651.37	2650.94	2650.66
989	0.9	0.2	0.1	4106.89	4252.95	4464.05	4521.24	4468.55	4466.98	4451.27	4409.13	4340.44	4242.65	4143.9	4082.5	4068.07	4040.4	4128.62	4170.22	4251.47	4600.07	5043.78	4604.53	4464.95	4463.48	4457.63	4466.29	4464.81	4508.14	4483.42	4466.86	4459.45	4466.38	4468.37	4461.98	4466.83	4465.97	4463.69	4458.65	4467.56	4462.37	4464.14	5299.12	5799.74	5539.78	4840.01	4465.38	4468.83	4449.64
1135	9	1.5	0.2	2548.59	2528.53	2536.84	2512.6	2484.38	2545.02	2527.35	2451.16	2358.53	2524.48	2537.92	2504.45	2552.17	2551.92	2534.23	2544.09	2528.14	2540.83	2542.87	2541.14	2531.26	2593.47	2765.25	2547.46	2541.35	2540.08	2544.43	2545.67	2530.66	2938.02	2958.72	2611.13	2543.41	2544.3	2541.26	2540.42	2539.32	2533.98	2543.33	2540.9	2538.62	2542.8	2546.22	2539.49	2527.29	2506.03
1269	0.8	6	0.7	786.962	1206.55	1535.84	1925.77	2367.17	2486.89	2361.33	2116.79	1821.96	1548.33	1296.89	1043.01	786.39	626.304	621.057	622.21	620.925	621.309	665.948	622.619	625.698	622.583	620.986	622.37	620.435	620.797	630.514	656.987	835.747	860.165	749.568	633.859	622.81	622.647	618.822	929.127	1968.72	2326.58	2452.89	2438.52	2417.36	2456.29	2420.01	2259.64	2026.87	1757.11
1077	0.3	2	0.4	991.894	943.311	1015.69	1036.88	1178.29	1611.48	1668.9	1581.82	1460.31	1342.77	1205.94	1056.5	941.133	794.279	684.515	645.198	581.25	515.022	490.07	467.754	468.355	482.696	878.405	1174.73	1241.27	1790.67	1866.57	1861.16	1841.04	1964.44	1867.86	1861.81	1872.51	1846.95	1784.83	1763.72	1846.4	1839.99	1862.93	1859.59	1856.8	1863.71	1862.14	1835.47	1767.6	1729.38
1026	3	1.5	0.4	843.179	927.796	1116.73	1309	1348.01	1311.21	1271.42	1181.55	1071	957.021	843.039	810.639	799.955	785.315	859.507	871.661	878.912	1047.88	1155.82	1142.62	1134.76	1076.65	1230.49	1280.04	1312.6	1670.14	1741.86	1667.78	1588.72	1494.11	1431.27	1335.66	1278.53	1201.34	1097.79	1694.39	1746.14	1675.35	1678.93	1684.63	1698.68	1696.3	1663.54	1586.61	1492.09	1417.69
740	1	5	1.5	1745.04	1716.67	1687.1	1643.81	1553.47	1471.59	1415.33	1414.58	1489.62	1506.79	1532.28	1548.93	1546	1537.87	1514.07	1487.51	1443.6	1483.07	1502.5	1478.19	1493.98	1563.75	1571.75	1595.85	1631.94	1652.95	1641.28	1621.48	1591.36	1569.86	1563.27	1556.24	1539.48	1643.15	1673.34	1682.48	1683.14	1674.48	1680.32	1652.57	1589.89	1563.24	1550.45	1518.69	1590.69	1655.22
1294	0.3	3	2	394.09	388.771	381.329	372.805	374.621	392.414	388.703	379.585	341.985	344.312	361.456	389.913	386.488	390.617	385.553	391.868	390.949	414.646	448.662	390.774	390.578	389.297	391.278	391.392	390.443	390.031	390.47	391.535	388.138	391.023	390.905	390.618	391.079	390.803	391.106	387.691	390.316	382.455	387.194	393.165	389.35	390.901	391.28	390.814	390.786	390.441
1848	0.6	1	0.9	904.186	937.801	1137.76	1500.98	1514.95	1395.01	1256.55	1111.89	969.202	820.984	659.681	674.798	601.898	586.005	588.819	601.825	552.529	432.073	379.265	369.782	368.875	368.438	366.81	356.817	416.368	579.59	654.264	746.898	782.89	704.004	598.325	483.526	380.364	367.239	365.387	736.63	1231.13	1381.08	1449.7	1512.27	1673.31	1772.96	1639.11	1474.11	1321.06	1167.37
1869	0.7	2	1.5	329.135	477.134	777.451	1510.62	1495.52	1152.98	830.716	517.131	330.075	316.569	311.038	316.138	328.383	318.507	325.345	330.728	329.789	329.194	326.021	313.848	297.376	275.324	250.989	227.022	241.705	336.783	331.419	399.637	530.661	379.025	331.649	326.625	319.165	312.833	300.457	783.064	1639.53	1841.42	1814.36	1715.34	1652.84	1546.6	1180.21	856.92	540.907	329.12
1863	0.9	0.9	0.7	1411.54	1556.68	1781.95	2071.74	2035.18	1969.76	1880.79	1767.74	1648.79	1536.78	1424.97	1348.62	1267.98	1271.96	1306.39	1255.84	1200.25	1133.86	1059.99	980.907	906.035	830.374	761.659	653.424	758.703	1070.47	1237.65	1246.44	1250.24	1208.64	1145.01	1079.53	1008.19	933.439	853.458	916.196	1086.11	1226.04	1321.38	1461.87	1464.22	1403.41	1316.35	1226.26	1157.32	1087.03
1770	0.4	0.5	0.1	2703.65	2853.12	3057.86	3147.8	3142.22	3107.79	3052.3	2985.23	2915.87	2845.94	2775.97	2702.03	2632.73	2668.1	2775.81	2797.63	2798.27	2780.15	2752.93	2697.8	2638.73	2575.44	2510.36	2479	2653.93	2946.08	3122.93	3146.64	3122.47	3076.99	3016.05	2951.41	2888.23	2818.29	2745.63	2803.55	2955.44	3053.2	3119.29	3139.44	3147.7	3144.39	3107.12	3044.8	2979.85	2914.29
965	3	1.5	0.1	1106.63	1110.19	1113.2	1293.63	1324.19	1248.69	1143.38	1112.28	1110.3	1107.41	1110.97	1109.64	1110.29	1109.32	1106.97	1110.17	1107.19	1111.62	1104.95	1104.68	1106.73	1110.22	1108.85	1096.43	1110.07	1106.78	1149.34	1197.03	1177.21	1314.78	1312.78	1227.95	1123.15	1110.33	1110.36	1109.88	1109.28	1108.52	1121.69	1399.26	1479.14	1445.94	1413.61	1301.64	1153.74	1109.4
1247	8	10	0.5	949.6	918.227	892.472	855.269	815.907	795.791	756.046	695.306	629.557	867.958	908.864	954.82	995.998	1004.1	978.389	990.953	1007.27	1004.53	989.952	975.48	961.873	970.23	1020.73	1003.58	1003.57	1006.13	1007.55	1003.56	992.077	1004.5	1013.59	1009.93	997.997	1012.84	1017.54	1016.58	1021.35	974.588	1006.33	981.76	1004.64	1014.52	1015.17	991.339	959.037	923.661
7313	4	10	0.4	830.948	880.05	898.361	891.792	915.512	898.97	981.801	878.253	693.815	667.553	747.76	834.451	923.155	916.766	858.941	900.271	864.476	926.08	956.619	820.699	605.062	388.854	377.28	468.231	613.795	733.194	895.21	897.449	909.96	919.347	970.881	938.276	809.13	825.563	936.741	903.631	887.491	916.397	884.288	909.515	913.217	917.871	962.464	927.022	809.951	781.161
1287	10	0.4	0.2	1057.32	1375.69	1589.99	1651.53	1681.46	1704.65	1616.11	1458.33	1269.99	1130.24	1092.76	1005.92	1001.23	999.773	998.467	1000.63	999.819	1371.52	1621.75	1455.34	1403.32	1383.18	1573.85	1521.02	1497.58	1592.95	1675.36	1442.03	1403.74	1591.83	1702.42	1499.96	1392.44	1335.67	1264.34	1481.74	1579.12	1464.5	1604.05	1614.34	1593.98	1570.9	1567.05	1517.43	1419.24	1282.23
1186	0.7	0.6	3	810.527	611.074	489.252	255.873	224.127	234.349	242.14	244.143	238.948	233.487	226.943	220.693	212.183	204.403	198.346	196.061	202.067	224.268	242.075	243.237	238.574	239.8	240.762	240.489	241.354	177.146	195.182	219.608	237.95	241.423	235.202	228.316	213.478	198.553	185.088	175.312	241.725	191.547	230.375	231.307	239.836	240.997	241.058	235.892	225.663	211.42
1042	6	0.9	0.3	768.19	794.114	832.166	871.036	879.615	873.275	856.991	837.245	816.064	798.501	783.524	765.296	748.309	735.931	736.277	735.695	734.804	746.131	745.247	732.698	716.635	700.922	690.092	682.99	692.954	861.283	954.694	957.851	949.531	946.659	939.288	922.173	904.697	887.39	875.137	1139.67	1254.33	1229.05	1187.45	1161.04	1184.76	1166.73	1117.12	1054.17	992.892	967.86
884	0.7	0.8	6	86.2562	93.3318	93.683	95.0733	97.981	89.2071	93.3915	92.3713	95.6819	93.1979	92.3274	95.5459	96.0794	99.676	94.0406	91.7323	93.1949	92.8528	89.5681	96.2232	90.1234	88.9863	90.2383	89.6378	90.2663	93.1622	91.0941	89.1247	94.5846	94.3197	97.0606	87.3342	89.2435	96.2074	91.8834	89.0988	97.5584	91.6463	87.0082	95.0875	87.4232	94.7634	94.5686	84.8171	90.2006	89.7897
1273	10	0.1	9	1560.31	1576.69	1590.57	1599.91	1587.89	1567.98	1558.26	1541.32	1499.98	1478.07	1471.92	1502.91	1528.43	1544.41	1578.33	1606.79	1609.35	1589.19	1607.91	1607.29	1604.5	1546.37	1558.24	1581.27	1600.68	1560.67	1593.73	1599.69	1517.13	1527.23	1574.89	1601.4	1609.7	1597.79	1606.33	1614.55	1568.6	1602.1	1593.4	1606.71	1602	1615.26	1619.08	1616.12	1610.13	1605.33
961	0.1	1	0.3	0	0	0	0	0	0	0	0	0	0	0	0	0	0	0	0	0	0	0	0	0	0	0	0	0	0	0	0	0	0	0	0	0	0	0	0	26.0378	68.4254	115.29	258.51	340.266	383.528	400.703	405.654	407.095	408.505
1144	2	2	0.2	797.18	831.44	836.448	840.994	829.07	840.28	850.013	882.558	834.819	687.593	844.059	799.186	822.226	832.567	834.605	838.332	825.831	777.303	846.345	841.268	832.334	778.652	854.089	839.625	822.599	803.218	842.633	840.71	797.425	840.15	849.244	839.87	832.808	836.073	821.635	780.336	861.575	807.705	847.683	836.302	813.603	841.262	840.634	841.124	839.963	831.341
616	7	10	0.4	563.911	459.281	607.604	629.658	505.376	589.896	659.457	602.136	606.821	585.942	565.195	594.135	602.382	586.854	572.597	584.561	610.306	563.418	598.959	604.845	575.079	623.852	552.061	614.163	570.883	601.634	582.861	597.207	588.641	595.186	581.43	663.157	597.818	567.827	577.461	579.324	586.294	594.747	593.898	600.064	599.007	593.409	590.046	594.052	596.044	605.932
911	0.9	0.3	0.1	978.772	1201.89	1427.07	1499.07	1501.36	1497.55	1487.52	1417.28	1321.45	1221.86	1109.55	992.018	887.058	861.854	863.486	862.7	863.135	862.814	861.843	863.355	862.831	862.821	862.604	862.192	863.371	912.978	1462.08	1732.38	1727.69	1836.43	1625.84	1501.28	1498.89	1498.13	1494.59	1538.01	1514.08	1586.88	2114.5	2171.4	2171.4	2145.3	2114.72	1868.41	1541.31	1498.27
1006	0.3	1	0.5	702.835	701.062	728.378	755.402	751.519	731.346	699.209	662.911	629.126	596.579	565.431	536.27	512.252	483.921	480.479	469.062	462.208	512.495	556.944	553.966	538.13	520.197	567.75	581.608	597.559	697.596	737.22	735.066	719.686	717.793	707.786	688.652	706.435	689.817	665.829	784.99	808.49	804.533	794.395	826.271	903.002	883.59	832.497	796.239	765.728	771.962
1048	9	0.8	0.3	807.414	805.009	870.917	1251.74	1253.89	1287.6	1288.49	1034.42	819.027	808.936	808.983	808.386	808.357	807.903	808.163	809.473	806.715	792.266	764.711	681.176	583.826	488.333	477.111	631.906	686.41	817.111	847.004	810.314	814.613	1206.13	1216.31	1021.16	818.129	808.401	809.669	807.141	808.569	801.359	806.381	1049.44	1140.93	1222.29	1211.82	1004.38	818.086	806.24
1123	4	10	0.4	420.907	462.691	493.608	502.415	511.683	516.761	504.843	485.478	468.322	528.693	549.088	575.248	579.302	587.378	606.5	613.371	619.193	678.197	701.38	695.255	681.627	666.643	653.741	647.45	642.784	726.901	778.276	743.287	632.34	629.823	652.12	650.223	637.626	622.981	608.673	710.21	722.92	735.962	752.358	683.353	696.149	665.764	670.474	658.801	640.548	622.891
1032	9	0.8	0.2	668.951	731.961	763.699	814.943	780.873	762.506	763.471	762.195	752.115	732.784	707.371	677.389	641.169	602.759	574.961	561.078	552.12	597.883	635.4	630.922	608.503	581.252	657.858	760.019	759.575	766.823	763.177	763.052	766.416	998.448	1022.94	868.312	763.244	762.953	762.479	757.472	762.652	772.66	797.321	962.269	1066.22	1083.95	967.572	802.111	762.753	761.868
1774	10	0.8	2	167.1	178.483	267.34	411.556	254.072	180.04	178.117	178.706	178.006	178.745	178.396	178.611	178.83	168.874	178.896	177.914	179.586	176.685	180.951	178.343	180.371	179.128	179.712	172.993	157.471	347.004	545.903	483.111	213.785	176.84	179.265	178.42	175.693	178.843	171.12	173.671	177.721	182.314	186.918	179.411	177.998	182.442	179.93	178.876	179.068	177.663
1781	9	0.3	0.2	895.579	1215.47	1145.45	1230.64	1234.94	1152.47	1146.65	1072.18	964.612	841.764	734.274	669.736	638.656	866.994	1208.19	1192.44	1281.99	1152.15	1060.6	958.588	831.378	721.658	640.867	549.491	727.94	1183.41	1215.25	1226	1236.97	1206.67	1175.85	1108.19	1039.3	924.528	797.72	1014.08	1211.43	1071.48	1206.39	1210.52	1206.44	1250.51	1279.51	1215.76	1110.97	988.157
355	10	0.1	0.2	1170.96	1156.53	1177.6	1125.81	1174.51	1184.97	1143.18	1035.23	976.827	944.456	995.293	1152.55	1174.58	1153.69	1131.84	1150.78	1151.07	1189.04	1156.82	1060.57	986.364	953.027	934.806	999.129	1114.4	1167.62	1170.18	1164.89	1154.29	1170.74	1145.2	1051.04	984.656	957.693	1030.11	1150.34	1163.68	1136.71	1167.25	1134.61	1154.95	1186.59	1188.97	1115.31	1091.19	1155.02
1101	9	1.5	0.4	542.331	641	744.105	922.04	867.187	710.093	655.246	614.139	566.597	512.845	447.785	464.518	491.826	545.502	606.624	673.126	676.25	668.93	659.026	629.399	587.664	540.301	487.42	433.061	383.769	476.215	603.105	667.278	678.683	671.72	643.726	602.331	554.445	504.266	447.795	726.223	1045.58	1070.76	963.622	847.718	856.445	867.432	719.383	651.006	607.293	556.924
1023	1	10	0.1	570.559	570.345	588.046	592.513	597.703	605.42	613.673	606.224	603.799	603.368	611.754	599.081	609.454	601.996	596.797	607.217	604.896	604.775	605.035	595.387	633.688	643.576	503.074	520.295	570.813	512.825	465.785	571.122	592.779	543.887	547.065	619.389	584.739	607.141	609.996	603.549	597.037	615.634	547.968	546.025	612.877	604.682	604.809	601.996	607.148	607.625
1060	0.5	4	0.3	357.315	370.253	408.2	462.712	464.749	455.225	436.462	412.329	389.016	369.194	346.371	345.296	348.071	343.625	374.375	388.926	406.873	452.022	461.902	456.819	453.569	443.509	502.435	526.823	537.548	509.471	560.437	561.13	549.144	547.139	554.105	537.071	515.368	493.642	476.273	577.426	598.086	600.475	602.425	574.818	553.338	594.183	588.192	570.256	550.055	531.025
1864	1	1.5	0.2	591.295	595.652	709.66	968.652	900.293	699.149	589.625	571.252	543.821	516.061	503.556	547.929	590.033	591.833	593.506	594.017	593.097	590.312	579.963	556.315	528.456	497.548	465.613	433.382	436.506	568.312	594.751	599.943	595.824	594.521	592.769	586.567	594.047	591.045	589.417	858.077	1290.7	1404.82	1437.6	1465.85	1476.98	1437.96	1277.2	1075.9	809.392	597.535
1797	0.4	3	0.2	352.623	464.451	427.629	478.263	464.98	464.015	458.144	466.635	461.688	449.639	439.417	456.796	435.615	360.335	467.584	453.038	478.762	446.2	482.27	541.765	532.721	475.446	405.839	410.632	351.277	458.406	467.023	475.584	451.486	448.009	453.045	454.033	450.924	459.089	427.29	385.09	463.673	423.385	456.818	439.983	468.558	467.668	456.034	459.66	451.438	465.536
305	5	0.4	0.8	616.913	349.758	176.026	277.746	629.355	743.279	766.608	915.434	731.844	183.61	150.993	307.086	766.867	594.525	573.635	548.811	681.673	734.365	795.636	832.211	720.347	797.085	674.594	645.547	755.479	383.277	766.036	705.529	746.544	747.014	762.508	922.225	845.676	435.299	349.119	381.645	652.498	635.431	688.379	483.384	399.517	387.358	513.184	768.905	848.146	691.476
968	9	6	0.1	556.578	554.828	553.436	553.728	558.61	557.743	558.114	556.684	555.903	556.314	556.472	556.522	556.61	556.058	555.983	556.869	542.338	557.609	556.819	555.773	557.191	555.966	555.639	556.166	556.779	555.33	552.134	557.085	553.736	558.118	557.287	557.311	556.688	556.039	556.815	557.772	554.964	554.963	550.682	556.518	554.554	554.302	558.528	556.842	556.437	556.403
1019	0.8	1	0.3	494.078	500.328	540.445	568.545	561.074	555.288	549.123	541.099	532.438	523.54	514.733	505.821	496.002	487.175	492.967	495.08	500.5	544.062	554.597	554.07	550.524	544.703	538.181	530.708	527.865	582.591	648.782	651.732	629.5	600.509	569.567	554.308	547.515	539.603	531.619	623.126	715.242	710.321	698.81	721.953	793.98	784.951	754.284	718.155	681.06	643.85
1302	5	3	0.3	555.372	556.121	555.445	554.39	550.612	547.647	540.833	513.96	502.863	517.381	530.196	551.928	554.255	554.315	553.783	554.032	554.839	569.338	569.169	554.149	554.672	554.57	554.787	554.925	553.172	554.246	555.949	555.406	552.475	550.487	540.739	530.422	523.854	519.426	516.711	514.966	517.198	529.607	548.368	555.749	553.439	547.968	545.023	541.312	537.61	534.87
1824	6	0.8	0.1	404.583	451.416	305.815	438.113	506.438	471.782	463.73	457.356	470.993	460.872	447.596	465.365	448.3	451.04	507.179	435.792	477.902	441.414	471.773	458.419	461.645	460.532	466.592	388.986	359.493	371.61	460.906	598.708	469.165	460.572	465.723	459.563	460.836	462.03	448.233	348.055	474.166	418.217	563.094	433.672	440.522	601.609	476.225	455.522	462.149	461.706
1316	0.1	0.1	0.1	0	0	0	0	0	0	0	0	0	0	0	0	8.31199	21.3219	41.8995	71.7279	135.863	200.948	270.112	268.824	267.673	265.591	274.925	273.753	268.464	262.032	256.49	247.789	237.472	223.143	211.772	201.203	192.298	184.061	177.747	170.124	159.971	152.14	145.8	138.879	132.986	130.6	128.261	124.555	120.44	117.504
1835	3	4	0.4	188.848	211.947	123.776	295.547	225.226	244.086	350.305	309.228	150.921	100.493	102.525	102.33	103.967	194.324	263.26	241.701	356.974	360.479	241.06	106.254	106.367	103.865	102.43	87.9421	165.871	198.082	198.703	233.045	256.366	354.427	345.487	219.048	124.534	103.57	100.861	163.483	248.973	185.935	204.072	200.085	217.915	262.071	384.659	311.342	130.16	102.665
1847	7	1.5	6	0	10.1443	100.543	8.57197	28.6836	34.6726	16.1457	0	0	0	0	0	0	0.784716	24.7874	15.5879	42.4755	1.31289	0.161427	0	0	0	0	0	4.27438	0	4.76182	30.2746	36.9045	19.9394	0	0	0	0	0	0	21.3554	0	7.14141	0	21.8511	35.7392	35.6194	0	0	0
1231	5	3	0.3	440.239	509.714	510.656	509.896	510.333	510.718	505.257	492.921	477.547	460.681	443.332	426.801	410.274	394.634	379.273	363.764	352.804	485.019	511.874	511.968	513.516	510.573	506.624	510.614	510.34	509.526	510.482	510.035	510.457	510.13	510.841	506.417	495.104	480.647	466.849	486.518	511.004	502.293	509.393	510.939	509.497	510.961	510.775	512.13	506.618	496.191
1140	2	1	0.1	511.064	510.376	509.538	507.273	506.163	506.081	504.804	503.732	502.771	503.171	502.733	503.834	503.553	502.738	502.75	501.96	500.982	500.612	499.22	498.354	497.653	496.625	495.43	494.822	493.644	491.752	491.081	487.64	487.712	492.092	498.488	497.587	496.512	495.725	494.997	493.39	494.026	510.923	513.182	512.682	511.409	510.474	509.077	507.565	506.251	555.622
1296	0.5	1	1.5	434.439	414.935	399.132	373.22	345.022	320.312	292.349	260.142	228.003	198.111	168.184	136.972	126.49	124.921	126.14	126.284	126.186	124.282	127.42	126.301	126.285	126.103	126.707	127.13	125.987	126.225	126.229	126.068	129.104	128.345	126.326	126.236	126.157	126.237	125.652	125.073	126.156	134.878	157.101	174.159	175.002	186.258	169.824	146.616	127.731	126.363
1659	8	0.6	0.2	490.967	499.239	539.761	571.311	572.606	562.963	545.932	526.867	509.192	502.912	498.903	494.852	491.773	505.236	513.776	507.281	526.457	545.797	539.438	527.416	541.379	539.682	528.361	514.756	508.609	569.581	727.644	787.354	793.244	787.321	773.88	754.021	732.028	709.194	683.821	707.375	731.279	740.641	748.498	786.449	817.649	832.432	828.18	811.414	790.689	772.651
1277	0.5	1.5	0.2	626.543	601.428	582.538	559.176	540.951	529.164	508.401	496.721	492.818	490.962	489.026	493.742	497.776	498.069	499.018	499.936	499.744	508.61	512.92	500.12	499.562	499.474	499.135	498.123	496.557	495.471	495.359	495.568	496.149	497.129	495.897	493.015	490.3	487.9	485.965	484.401	484.995	492.098	499.455	499.895	499.81	499.414	498.287	495.948	493.247	491.243
1021	3	4	0.1	438.535	469.971	481.406	483.505	481.857	482.368	482.664	482.13	483.688	483.186	487.302	480.393	477.287	473.764	469.986	462.434	455.134	451.169	444.313	435.154	428.273	420.348	431.02	468.195	480.554	456.127	482.463	483.442	475.542	482.279	483.07	482.676	482.999	482.435	482.599	481.316	482.512	477.106	466.737	504.759	482.485	481.944	483.281	482.459	482.872	482.523
1280	10	2	1	455.4	370.413	280.318	195.098	127.714	120.407	117.926	111.527	195.662	493.765	468.842	468.497	478.985	478.16	477.353	475.839	443.967	394.825	326.459	248.031	183.277	134.169	146.904	126.833	119.359	119.323	119.448	119.537	119.139	119.206	119.738	119.523	119.439	119.471	119.531	119.439	119.36	119.399	119.389	119.757	119.648	119.327	119.576	119.509	119.442	119.406
1120	4	7	5	32.7632	32.2163	31.6001	31.8077	33.7028	35.3645	34.9672	33.6027	31.455	29.0641	26.0027	23.2134	19.3209	15.4437	12.3834	8.89884	6.29645	4.27201	1.28017	0.0777494	0.0305002	0.365079	0.00541228	0	0.0374288	0.0292176	0.0374279	0.00838004	11.5335	54.6836	76.9857	91.2451	99.5162	104.711	107.622	110.619	112.279	113.898	114.024	113.924	113.872	113.979	114.586	114.129	112.559	114.493
182	6	0.2	0.4	681.003	704.744	748.847	725.375	762.801	748.233	706.21	673.852	652.841	632.107	610.756	591.512	570.816	603.325	698.385	744.732	727.764	662.956	474.906	372.105	323.192	277.07	265.954	520.176	744.473	739.613	732.905	709.283	750.105	750.899	746.496	700.77	691.197	686.654	565.056	636.947	701.277	714.221	726.027	744.76	741.373	754.499	757.319	739.174	733.138	727.719
7311	0.4	2	0.1	417.775	414.7	417.111	418.564	418.235	418.192	418.138	418.298	417.399	418.25	419.075	417.451	416.4	415.334	413.937	412.364	411.189	414.018	418.111	418.125	418.114	418.522	408.186	418.37	416.892	402.921	414.118	418.186	415.777	420.027	418.447	417.962	418.127	418.236	418.092	418.1	417.005	414.063	417.562	421.559	418.172	417.915	417.938	418.142	418.288	417.924
1755	0.4	1.5	1	94.3604	104.574	150.556	212.16	198.161	157.141	112.675	99.2333	99.2726	99.3369	98.9293	87.4724	89.9811	124.634	153.123	132.291	112.356	140.245	143.125	104.027	99.3378	98.3341	94.9305	90.9792	176.933	279.677	327.232	314.421	289.157	250.944	199.127	141.812	100.894	99.3743	97.7647	103.657	146.334	186.181	180.412	170.069	305.924	414.458	371.65	312.154	249.8	186.562
1152	5	0.5	0.9	0	0	0	0	0	0	0	0	0	0	0	0	0	0	0	0	0	0	0	0	0	0	0	0	0	0	0	0	0	0	0	0	0	0	0	0	0	0	0	0	0	0	0	0	0	0
1192	3	2	0.3	358.821	361.889	363.801	363.211	362.283	363.82	363.894	362.994	363.271	362.641	362.063	361.828	363.21	361.621	362.475	361.96	363.061	359.38	364.673	362.58	362.74	361.846	363.4	363.039	361.142	360.431	363.474	363.34	362.86	363.222	364.307	357.757	342.478	329.732	321.699	346.068	365.418	357.851	364.392	363.995	362.218	363.742	362.595	361.875	363.596	365.346
541	9	0.1	5	0	0	0	0	113.77	255.55	107.464	88.2552	80.4748	63.4027	41.2268	15.2142	4.50943e-05	0	0	12.8052	80.5516	86.7577	70.5706	46.7632	12.7015	0	0	0	0	0	0	0.401472	82.8842	107.183	86.4516	82.0881	69.1001	48.143	22.1668	1.02132	0	0	0	0	43.6295	112.851	84.6438	83.4757	71.4918	46.7164
1822	6	0.5	0.1	301.571	282.798	241.864	328.172	363.96	502.625	353.75	330.104	331.279	330.141	328.475	328.035	329.395	283.34	356.102	322.295	427.621	328.397	335.346	334.425	332.689	332.222	331.93	315.752	312.995	245.299	308.268	332.473	403.772	330.582	330.946	329.63	330.448	330.503	323.461	301.148	299.986	282.372	303.988	301.16	309.437	366.955	343.217	331.515	330.963	329.977
972	2	6	0.1	350.517	353.582	352.443	469.712	377.102	356.411	356.627	356.479	356.863	356.245	354.318	360.374	350.469	351.509	351.109	350.325	317.621	307.076	337.997	356.485	353.473	353.549	352.782	351.399	350.604	349.18	339.588	348.751	355.723	354.967	356.454	356.81	355.358	355.691	355.749	354.257	351.608	352.696	346.886	351.603	356.8	355.72	356.848	355.76	356.76	355.965
613	9	2	3	77.7678	62.0605	74.6123	75.0283	376.742	566.755	419.467	95.8154	79.5527	76.0106	75.1697	79.0146	78.4045	77.3908	68.9619	69.0354	78.9774	81.8876	74.4323	49.0206	16.6311	0.0107318	0	0	0	0.343947	42.4374	75.7244	74.2853	82.5905	85.3275	68.6374	35.8637	5.53866	0	5.88668	18.8272	36.8754	69.7244	75.4376	76.6825	103.434	83.8264	78.6026	60.9471	31.8485
1086	0.2	0.6	0.9	263.713	257.071	251.058	244.731	238.87	231.411	219.991	206.845	186.992	153.438	138.602	132.661	127.546	122.506	117.392	112.39	108.282	102.995	88.232	85.7026	83.9601	81.7285	80.8064	80.2461	79.7061	79.2967	78.997	78.4357	77.5911	76.4988	75.3368	73.9531	71.7455	67.8843	66.6374	66.5504	66.8814	74.6232	86.2993	94.4882	92.1992	87.9471	86.5814	85.4658	84.1739	81.8185
1295	0.2	0.1	0.1	834.553	869.514	872	872	871.993	871.1	863.409	851.961	839.927	831.731	822.862	817.643	816.15	828.579	833.841	830.622	833.146	862.344	871.612	867.692	867.146	863.671	871.997	872	872	872	872	871.997	872	872	871.699	868.974	861.207	857.288	862.954	872	872	872	872	872	872	871.969	871.348	870.351	869.9	868.184
1139	10	0.9	0.2	359.183	345.595	337.813	335.257	332.803	329.429	322.646	316.163	313.125	338.056	341.254	359.302	359.797	350.839	369.907	370.946	365.484	359.692	349.855	338.443	336.366	383.451	426	423.273	415.964	412.099	412.493	408.475	426.577	478.295	514.109	511.186	502.813	493.575	483.364	473.604	472.472	474.346	474.562	471.312	464.098	454.169	440.145	423.198	406.529	390.224
1862	0.8	5	0.3	204.78	278.47	472.758	816.764	687.63	368.516	310.971	283.661	237.208	188.53	171.344	194.851	195.83	229.612	301.991	170.012	189.975	202.433	197.221	150.388	98.3766	80.6949	80.8925	79.5294	151.285	230.419	286.752	235.185	162.046	201.551	189.414	159.012	125.357	85.5269	83.9027	220.712	299.012	248.77	265.116	275.588	271.133	244.608	261.921	236.534	196.753	150.535
629	10	0.1	0.2	262.819	215.457	246.611	259.258	271.314	241.241	263.476	261.263	266.163	271.555	257.672	282.784	247.629	279.55	258.745	275.155	269.783	260.997	281.494	245.072	269.697	268.166	248.853	278.037	250.819	258.434	284.707	273.576	252.376	262.305	274.406	277.292	255.336	258.749	261.356	269.891	268.083	266.874	249.897	266.378	285.709	272.338	254.019	266.279	262.438	275.198
1000	2	1.5	0.2	293.869	306.528	318.679	318.393	319.413	319.326	317.121	311.448	304.736	297.831	296.432	292.333	294.024	304.157	317.511	317.803	313.614	333.262	328.015	319.055	320.02	318.126	311.568	318.219	316.067	331.591	327.375	318.011	318.173	317.279	319.698	316.539	309.719	308.802	306.714	361.756	342.352	317.819	317.465	335.873	344.08	319.729	318.965	317.003	313.592	314.224
7306	3	3	5	0	0	0	0	0	5.06614	7.89234	0.0449751	0	0	0	0	0	0	0	0	10.6594	0	0.0493819	0	0	0	0	0	0	0	0	0	4.38311	6.47046	0.248628	0	0	0	0	0	0	0	0	0	0	1.70042	8.12066	0.0712414	0	0
991	9	0.3	0.2	389.275	439.455	498.834	486.907	519.542	518.746	515.75	502.046	483.088	461.043	437.589	410.88	388.941	362.71	337.735	319.846	307.827	323.37	338.441	348.4	353.07	350.568	427.731	517.354	519.877	449.005	423.003	471.862	498.579	503.111	520.795	517.785	522.212	515.449	501.989	484.185	462.321	443.468	451.269	512.214	520.089	515.456	521.928	509.874	505.824	495.735
7317	3	3	0.3	220.587	276.148	295.427	295.935	270.425	244.917	246.581	239.374	228.463	215.302	200.406	185.008	167.982	204.685	247.898	269.593	275.257	272.741	263.178	249.085	232.727	213.787	195.607	179.292	272.596	295.731	286.026	290.326	292.245	291.393	283.497	275.103	264.272	252.066	238.359	250.959	293.414	257.22	287.578	275.981	287.154	294.268	293.418	290.386	282.662	272.318
998	0.9	1	0.3	298.476	324.391	312.393	420.979	685.691	744.394	639.242	477.47	377.767	343.657	321.98	299.091	296.548	296.655	295.975	296.748	296.233	242.318	131.034	66.4382	54.5942	50.1367	75.6772	77.071	74.4444	74.1953	76.5501	77.0456	74.4226	72.1996	73.4745	73.6632	85.7404	128.967	179.011	223.54	262.374	276.844	292.065	330.685	369.16	313.105	267.661	220.743	220.569	265.133
1716	7	1.5	0.3	177.992	215.88	283.822	297.926	293.204	285.096	272.5	252.453	230.397	208.36	187.873	168.467	160.832	203.466	241.396	240.234	259.483	298.878	290.664	280.933	267.065	248.761	231.385	214.158	256.699	362.756	417.456	332.207	290.199	294.362	289.168	271.156	253.962	236.007	216.216	317.849	406.954	317.781	279.928	297.753	453.322	437.3	325.203	286.467	272.588	273.5
1896	10	0.1	0.5	350.277	400.437	410.245	447.871	402.264	392.321	435.696	439.148	416.371	266.089	274.191	274.137	255.27	360.793	427.614	447.894	441.408	378.085	469.389	437.355	415.198	448.216	428.915	457.566	355.23	255.334	453.668	426.159	439.598	452.293	457.215	417.626	433.263	414.299	428.131	388.889	444.187	316.343	427.386	419.435	456.043	428.87	441.554	444.217	388.705	441.415
1883	0.4	3	0.1	270.172	288.936	284.281	302.936	283.305	286.735	285.075	285.535	285.098	282.92	287.627	285.24	284.727	249.501	286.496	285.543	284.87	287.853	278.435	281.321	277.542	271.324	267.733	265.281	275.994	286.587	283.689	282.495	286.741	285.437	285.142	284.811	282.729	282.182	284.823	279.207	256.532	276.368	281.239	286.783	286.9	286.18	285.74	285.963	286.289	282.592
1285	0.6	0.7	3	208.697	161.857	111.18	67.5776	63.5063	68.3757	68.6191	68.7032	68.5008	68.3271	67.424	51.4516	51.4532	60.6405	67.7815	67.4868	68.0086	83.9083	98.2655	72.665	68.5003	68.3306	67.6127	68.37	68.5233	67.8733	68.1594	68.1793	63.8002	66.6223	68.5575	68.716	68.1257	67.0448	65.9733	64.3177	64.1779	61.7734	68.198	68.7662	67.7804	68.3919	68.6273	68.5627	68.5747	67.859
1266	2	0.2	0.1	475.013	479.539	480.245	480.384	478.921	480.719	480.904	480.321	478.95	478.289	477.167	476.112	473.254	470.639	467.612	463.581	461.241	460.445	458.897	455.877	456.171	456.259	456.725	456.361	456.08	456.326	456.737	458.165	462.445	465.581	466.133	464.381	461.366	459.005	458.272	473.74	480.601	481.84	488.27	480.725	480.691	480.707	480.755	480.604	480.432	479.695
1176	0.5	9	1.5	223.121	160.989	101.332	66.2426	59.1614	63.981	67.2802	67.5363	77.7747	251.015	192.801	213.646	218.15	171.06	128.106	103.231	70.6935	67.2338	67.3965	67.6742	67.7219	66.2462	68.0686	67.5607	67.1958	66.5959	66.3818	67.7785	71.0265	124.362	195.402	195.191	175.049	144.948	107.521	71.8217	66.3459	72.6776	72.9631	67.621	67.3129	67.0699	67.3442	67.605	67.8285	69.2144
924	2	1	0.5	256.146	248.521	252.693	270.96	266.105	265.066	259.939	247.449	243.525	236.25	230.185	243.31	262.033	263.934	271.942	269.646	268.549	263.896	281.068	324.536	299.501	270.685	258.504	252.551	245.581	254.153	333.35	375.4	375.248	390.94	396.495	400.123	380.902	356.505	337.264	357.074	354.713	350.48	356.322	407.451	402.212	375.39	340.028	298.899	268.062	254.047
758	8	0.4	0.1	458.14	459.643	456.284	458.303	460.385	455.678	447.03	445.945	461.668	458.383	455.917	460.604	453.998	466.217	466.598	454.229	458.234	460.623	449.817	426.07	413.853	426.917	426.931	428.9	436.54	441.162	444.91	452.156	445.103	438.807	445.184	447.491	447.492	455.852	457.585	458.61	456.073	463.662	455.597	463.962	459.521	459.75	436.988	423.569	421.023	437.388
1257	0.1	10	0.1	0	0	0	0	0	0	0	0	0	0	0	0	0	0	0	0	0	0	0	0	0	0	0	0	0	0	0	0	0	0	0	0	0	0	0	0	0	0	0	0	0	0	0	0	0	0
895	2	0.5	0.2	302.398	311.127	308.843	303.077	311.939	312.83	311.298	319.431	315.825	319.588	316.54	311.867	315.882	316.447	316.901	317.504	318.854	317.235	316.508	344.985	398.043	396.342	398.526	309.625	387.795	350.588	338.234	307.608	318.791	310.605	317.581	313.933	306.479	308.293	308.211	316.474	306.454	307.42	308.177	300.025	299.332	315.116	310.794	313.871	314.726	303.983
1317	0.3	6	0.2	619.522	600.027	571.796	541.852	516.487	520.95	498.781	591.455	653.896	649.516	638.13	628.442	621.148	607.543	588.587	563.777	542.915	558.739	592.738	584.856	576.484	567.929	585.212	577.328	561.146	546.222	533.754	516.995	500.879	478.868	358.907	247.071	234.971	225.426	221.104	214.718	208.245	202.586	194.38	183.786	171.627	160.715	151.473	142.353	135.035	130.735
1242	10	2	10	52.4077	37.0724	16.1739	1.53337	0	0	0	0	0.910928	86.4174	60.6129	58.3775	58.0083	58.9398	59.4568	56.9032	57.906	47.7291	26.2227	0.875412	6.69816	15.6215	5.47386	0	0	0	0	0	0	0	0	0	0	0	0	0	38.7789	58.5128	61.8907	57.029	52.7477	35.4284	12.2356	0.0565387	0	0
107	4	0.3	1	389.373	416.019	423.421	415.789	409.837	403.574	385.286	360.731	337.028	315.163	293.997	280.832	305.305	361.65	415.737	418.234	416.594	403.489	380.662	352.611	326.286	303.837	284.411	396.636	423.032	422.176	424.745	416.618	425.59	424.683	412.449	393.003	372.984	354.092	333.695	374.501	409.636	410.635	421.877	425.29	420.386	421.901	411.297	393.162	373.764	354.292
1841	0.4	7	4	20.048	43.4873	77.6067	113.807	54.0648	54.2337	53.6216	52.5272	45.1034	34.6652	20.6281	6.15649	0.209917	21.4274	48.1132	41.6997	52.1686	50.3686	45.8766	32.3639	17.51	2.86869	0	0.31266	18.0694	64.8422	59.4313	48.6223	55.3494	48.8187	43.3123	34.0166	22.7892	7.50023	0.282463	37.3417	53.9273	35.5333	38.3369	37.8869	51.2984	52.6194	53.7507	50.1197	43.0454	32.0281
907	1	0.3	0.1	335.441	390.662	393.581	391.26	391.64	390.91	387.227	364.377	338.908	330.696	319.002	300.763	276.856	250.621	245.559	249.103	257.443	245.922	228.303	225.578	225.709	225.617	225.582	225.789	225.708	231.767	381.815	507.759	501.782	522.036	470.77	395.239	391.225	391.192	389.71	402.918	390.962	410.229	522.871	568.9	568.9	550.305	475.062	396.456	390.918	389.034
80	0.3	0.8	0.5	488.462	559.388	560.868	560.527	553.908	540.887	497.346	416.567	240.382	116.709	52.7113	194.694	298.031	254.798	285.889	284.238	239.27	210.718	186.913	111.715	51.1713	47.7381	63.4228	336.178	514.222	559.604	561.168	561.155	560.193	542.389	503.955	435.148	274.005	146.108	152.499	322.772	543.555	560.585	560.856	560.525	555.583	553.723	553.767	503.401	421.64	285.903
1236	0.2	0.1	2	228.647	228.911	228.909	228.386	227.387	221.222	195.245	155.949	126.061	100.046	75.9795	53.2623	52.6663	52.9497	52.8297	52.9752	52.9758	52.9524	52.9726	52.9981	53.0329	52.9211	55.3366	52.9705	52.9752	52.9742	52.936	52.9845	52.9589	52.7803	53.011	52.9523	52.955	53.0007	53.0256	52.9659	52.9652	52.9135	52.8924	52.8674	52.9026	52.9666	52.9957	53.0137	53.0395	53.1252
981	3	0.1	0.2	367.312	366.649	367.801	462.177	392.796	367.456	367.549	367.373	367.615	367.468	367.57	367.586	367.527	368.314	366.915	367.274	365.206	367.795	368.131	366.725	363.927	364.279	364.789	366.259	368.332	353.467	350.035	366.48	367.364	365	366.021	367.472	367.584	367.633	367.597	367.259	367.48	360.706	365.41	368.273	367.634	368.253	366.816	367.917	367.316	367.341
1093	0.6	3	1.5	51.0087	50.2848	50.9337	50.917	50.6624	51.0618	51.3103	50.9365	50.5676	48.6284	50.4597	49.9612	50.8692	47.8154	50.6768	50.9034	48.8278	51.7996	51.3494	50.9364	51.1585	50.8532	50.7234	50.8518	51.3667	100.185	122.268	90.641	50.4955	54.8899	51.6548	51.1592	51.1155	51.0075	50.8401	53.0295	78.4874	51.4111	51.0601	50.3343	83.6672	99.5226	56.3719	51.0921	51.3061	50.8273
1709	7	0.5	0.4	203.505	252.221	327.311	330.022	341.873	327.441	316.589	299.849	278.806	251.115	219.418	192.842	176.48	184.545	227.643	262.973	289.399	283.209	276.243	266.065	245.197	220.926	200.254	195.326	223.248	327.244	312.986	321.182	322.485	326.195	334.318	323.737	302.012	272.49	239.9	222.069	221.667	243.373	289.892	325.332	334.743	351.317	306.416	285.362	260.928	231.062
1017	1	1.5	0.1	190.477	193.558	202.145	202.545	201.815	201.827	201.794	201.206	199.139	195.975	192.153	187.753	183.195	184.671	196.543	199.445	191.624	200.219	201.14	202.024	203.132	201.52	199.93	198.495	176.037	246.716	323.493	284.07	219.55	201.581	201.729	198.733	196.282	197.205	198.542	412.01	488.974	444.19	395.352	383.089	450.004	418.857	348.734	246.908	201.96	202.262
1194	7	0.4	5	45.2773	46.7168	48.7906	48.7669	49.2759	49.6515	47.9718	44.6365	40.2751	35.9131	35.4955	35.7984	37.4454	38.0138	37.7936	38.4989	39.5389	39.9709	39.0597	36.6905	33.527	36.3564	53.2844	48.7972	48.9879	47.8765	48.8113	48.889	41.1928	47.6553	49.1366	48.9671	48.7386	48.9393	48.5123	48.233	47.407	46.1367	45.1653	44.9311	45.0595	44.7928	43.1981	40.346	36.3163	31.4647
[truncated: 434 more columns]

## Sheet: Outflow(WG inflow-With Demand)
grand_id	p1	p2	p3	1980-01	1980-02	1980-03	1980-04	1980-05	1980-06	1980-07	1980-08	1980-09	1980-10	1980-11	1980-12	1981-01	1981-02	1981-03	1981-04	1981-05	1981-06	1981-07	1981-08	1981-09	1981-10	1981-11	1981-12	1982-01	1982-02	1982-03	1982-04	1982-05	1982-06	1982-07	1982-08	1982-09	1982-10	1982-11	1982-12	1983-01	1983-02	1983-03	1983-04	1983-05	1983-06	1983-07	1983-08	1983-09	1983-10
610	0.4	0.5	0.1	1420.38	4583.12	3663.81	2124	3935.16	4905.39	2052.37	1500.26	1484.12	1556.25	1510.86	1555.91	1541.14	1378.83	1864.78	1614.59	1428.37	1316.6	1186.8	1119.24	1101.78	1136.93	1096.67	1130.92	1154.19	1165.2	1135.79	1055.27	1170.26	1161.85	1159.07	1124.99	1082.79	1117.62	1078.29	1236.51	1102.68	1068.89	1220.27	1677.29	1155.93	1148.79	1259.08	1189.89	1091.74	1322.77
1294	1	3	2	33.2573	36.3958	37.0924	38.7123	57.2173	25.1112	34.6203	17.3595	89.483	38.845	54.8761	98.1651	89.0441	91.0833	269.324	197.4	187.611	487.393	270.317	177.361	166.32	199.428	188.501	166.252	152.222	150.466	155.33	81.4229	103.739	80.6364	70.593	70.1318	58.0023	71.2591	60.8019	79.2994	83.2716	182.864	233.268	99.3426	107.163	84.703	76.2133	68.1296	56.7801	48.9646
1247	10	0.4	0.2	100.291	87.5792	75.3188	79.9913	108.621	63.593	69.599	77.0322	155.837	74.0145	115.052	138.704	77.841	77.7764	249.521	83.2268	81.344	89.8161	94.3427	89.719	86.3939	923.026	195.066	158.54	166.145	146.827	161.927	150.781	542.087	282.844	182.438	86.3468	152.178	87.6842	85.8163	93.7043	94.2547	201.192	92.7998	144.844	87.3671	91.8143	82.8218	87.9644	84.9488	88.5676
1186	3	7	6	355.677	36.6261	190.984	65.4638	146.862	47.0768	52.2806	52.2743	52.8024	62.304	59.0426	60.0786	56.1591	30.3662	32.0992	29.4171	70.2679	74.4889	46.5166	52.3341	52.3958	60.7133	64.6644	54.9801	54.5035	70.4194	44.2163	51.9751	56.7442	49.844	47.3941	22.7216	12.3318	17.7815	25.069	215.371	29.5258	291.771	155.215	34.9419	62.2262	54.1683	52.4367	51.5455	51.3505	57.7332
355	10	0.1	0.3	156.387	209.632	40.0221	638.179	681.278	227.778	32.2719	40.2458	33.3966	58.4281	54.8108	149.412	142.702	186.665	400.224	313.656	1182.35	177.515	34.2048	40.4765	37.0408	33.2306	59.1225	45.1548	35.1253	152.778	422.412	161.186	704.437	273.062	30.5114	41.1522	34.5072	52.5627	56.835	274.256	203.572	372.118	406.845	787.439	1462.07	538.786	124.277	40.4918	53.7529	173.936
1302	10	3	0.3	22.0951	14.1074	16.1871	12.9945	19.9767	6.71059	15.3955	42.6549	23.7442	16.352	21.5453	19.3146	49.8612	20.5662	72.9196	42.987	36.156	232.598	54.5793	24.5621	19.8282	28.6448	21.5569	23.3564	16.2988	16.1092	14.2844	14.0524	21.1901	8.75665	23.6802	17.3228	16.3683	16.3714	16.8269	18.3542	18.7944	19.8833	46.3183	13.1571	17.0422	15.0379	17.0133	16.621	16.0626	16.5736
1231	0.2	0.1	0.1	140.708	93.7448	62.4553	52.9472	46.0846	28.5358	28.1252	27.1486	26.5877	28.8371	27.9739	28.8051	28.1492	25.5304	29.0039	27.7119	38.751	129.094	53.6233	31.5187	28.0337	39.8942	83.205	57.8134	50.4787	62.0558	54.0874	42.249	45.9281	37.6955	28.597	27.2135	26.4854	28.7601	32.1105	243.746	72.075	163.423	91.83	65.0737	54.6641	46.4576	34.2597	27.8461	26.8283	28.3224
1140	3	1	0.1	1.21458	0.739665	0.190444	1.89263	1.27218	0.538159	0.615519	0.484041	0.859955	0.306671	1.71689	0.758005	0.756865	0.420242	1.02433	0.523456	1.09558	0.8169	0.610203	0.465591	0.215157	1.73445	0.186224	0.611373	1.75658	0.901503	0.181092	3.23335	2.12127	0.767827	0.187183	0.473703	0.211007	0.180956	1.28163	1.74597	1.80114	0.851133	2.24991	0.310833	0.657361	0.728636	0.647895	0.496404	0.207799	10.0378
1296	0.6	0.7	1.5	89.0652	28.263	40.2149	37.7476	49.6786	30.7255	35.7714	37.68	35.531	35.5823	34.1732	28.3635	5.25674	9.26317	9.36578	6.13344	8.55415	61.4203	12.7375	8.33221	7.28768	31.9698	26.9086	15.4807	12.253	9.99398	11.8276	13.5126	39.8504	16.0657	7.75974	5.42108	6.36708	7.4236	11.3055	39.346	33.1251	40.6134	40.6237	21.4785	52.3295	20.057	32.8248	33.3903	16.5902	6.44725
1277	1.5	0.2	0.5	4.06529	3.90562	3.6548	3.56692	6.91869	2.7762	3.95936	3.8787	4.38421	3.06324	5.53957	4.22559	3.93643	3.56014	9.34834	5.62617	6.69382	30.0803	17.5636	3.80792	3.52364	3.6768	3.54905	3.48746	4.14529	4.2557	3.64511	3.93903	4.77102	3.08837	3.67657	3.62848	3.42866	3.52493	3.67227	5.35241	4.71875	3.74455	4.38835	4.75407	6.84354	3.4485	3.71543	3.68207	3.45747	3.5622
1280	4	2	1	64.5519	99.408	98.8224	83.8863	70.377	8.53305	7.37176	9.52684	202.603	130.607	115.025	133.311	130.984	95.3587	153.041	97.7614	103.878	98.7024	97.0465	98.3521	89.827	158.463	52.5291	73.0568	48.9326	53.356	46.9741	39.0427	54.4735	53.0902	38.6232	30.2969	26.9294	29.8213	29.5893	30.0978	36.2493	48.1057	51.5223	37.186	30.4593	33.1293	20.4954	15.4096	13.9537	18.2743
182	0.5	1	0.2	290.063	371.966	216.613	137.349	115.741	109.223	114.977	166.797	180.694	84.7695	33.6906	36.616	44.4426	108.167	193.007	128.225	35.9573	30.361	32.0958	30.845	29.8305	32.7921	103.626	208.557	90.9596	363.166	408.012	488.086	159.927	120.691	103.482	116.527	110.452	156.566	392.628	150.209	319.576	511.25	695.356	290.288	149.177	121.165	108.997	119.131	108.762	156.753
1152	6	0.5	0.8	0	0	0	0	0	0	0	0	0	0	0	0	0	0	0	0	0	0	0	0	0	0	0	0	0	0	0	0	0	0	0	0	0	0	0	0	0	0	0	0	0	0	0	0	0	0
1295	0.2	0.1	0.1	26.4285	47.1227	41.284	26.133	33.0749	16.0221	17.5787	17.1041	16.5856	17.0241	19.0101	17.5616	20.8437	15.4552	15.6651	15.6454	19.5701	28.213	27.5594	17.1586	16.5687	19.5535	87.8022	26.9278	35.7306	28.3133	35.3823	77.8018	83.0666	23.771	17.3753	17.2756	16.2549	18.2895	107.724	138.006	69.0335	140.376	119.273	28.125	105.833	23.1757	21.3782	20.9295	17.0267	16.2211
629	10	0.1	0.2	2149.27	4338.26	3939.49	2013.75	3433.36	4191.9	2434.67	1972	1411.68	1984.89	1414.46	1993.82	1416.91	1964.96	1440.37	2001.2	1451.5	1414.04	1941.62	1411.42	1949.61	1397.06	1392.11	1969.77	1441.06	1363.59	1962.89	1429.7	1423.98	1394.14	1412.96	1413.63	1375.07	1381.17	1379.44	1390.47	1411.94	1418.07	1434.69	1398.15	1418.95	847.934	1395.45	1484.44	1377.91	1401.2
1266	0.4	2	0.3	90.2127	61.3592	54.2499	50.312	23.8333	10.111	7.88743	7.74966	7.34914	7.6328	7.40093	7.66714	7.67077	7.30834	8.98425	8.04638	8.17927	9.14566	8.4977	7.66046	7.33809	7.74109	8.04691	8.05111	7.96303	7.59804	8.19446	8.12314	9.30143	7.20535	7.57747	7.39392	7.07895	7.36902	7.33864	12.1962	8.12185	60.2059	48.6394	35.236	47.7931	12.3917	10.629	10.8514	8.93695	7.69254
1176	1	0.1	0.1	5.69904	7.37996	4.58038	7.67067	11.9156	7.18674	7.20418	15.8677	80.5831	51.8709	172.78	133.917	63.9259	63.664	80.2304	64.4376	59.4178	27.4567	29.6668	20.3561	11.8123	58.7356	15.1167	9.68332	19.4539	16.9585	14.2523	8.95772	91.9206	70.8478	53.9815	66.8765	59.9945	58.3947	57.083	20.3133	38.4913	66.1269	39.6029	15.9586	21.0782	32.7058	34.052	26.5973	12.7031	84.4043
758	10	7	0.6	105.835	76.4818	82.3648	58.6304	60.0127	55.2143	59.9887	60.3785	59.2351	61.1815	59.6653	61.7889	61.574	55.6542	61.1605	59.6469	61.0431	48.3759	61.3847	58.7971	56.9008	62.6322	56.7681	58.0637	57.9406	51.0289	56.6576	54.9143	56.9724	61.1034	57.4313	56.6168	55.3763	61.6007	60.0464	82.9102	61.6992	75.5658	60.7993	58.3608	59.1944	58.0492	61.2095	59.3707	57.5881	61.1815
1242	10	2	10	13.3547	28.6721	27.4371	11.6355	3.33089	2.52382	2.34182	2.65773	359.463	139.416	75.5854	60.8798	49.3618	44.9906	38.2499	30.196	20.7761	21.6042	31.4369	38.3911	41.2896	19.0635	27.1036	14.2632	16.8229	12.0233	9.61415	4.32029	3.37631	2.12667	2.7796	1.69045	1.68313	1.38922	1.88031	14.3193	116.708	117.24	25.2217	43.9811	9.22478	24.3359	23.0486	1.80948	1.27011	11.987
1236	0.7	0.4	1.5	6.29516	6.4775	6.87987	6.51397	7.33023	7.20744	6.63754	5.72288	11.9345	22.348	21.1228	38.4736	20.2539	17.9721	24.1428	18.705	17.9748	14.192	5.68236	4.51791	3.50062	31.3329	12.1297	16.3998	9.98562	10.2424	11.8425	10.9846	11.4617	18.1554	11.2895	9.29785	7.89561	7.01522	6.07519	5.27419	5.00319	5.47878	8.18133	9.47208	8.53143	7.27529	5.57578	3.99641	3.41747	2.61745
1194	10	0.8	3	26.4174	27.3126	81.2082	68.6556	38.0119	9.51593	6.0577	6.07808	6.20582	10.9916	9.75156	12.2283	11.3509	7.35392	13.3524	10.0596	10.0287	10.0755	7.96016	6.1073	5.99963	113.012	37.2246	50.0825	27.2389	23.5037	24.0486	19.9126	77.5513	54.5121	27.7149	21.547	14.4155	14.7655	9.42362	9.93773	10.1274	8.18074	10.8371	10.3057	9.98884	8.17281	7.90888	6.06909	5.83054	6.14294
[truncated: 434 more columns]

## Sheet: Storage(WG inflow-With Demand)
grand_id	p1	p2	p3	1980-01	1980-02	1980-03	1980-04	1980-05	1980-06	1980-07	1980-08	1980-09	1980-10	1980-11	1980-12	1981-01	1981-02	1981-03	1981-04	1981-05	1981-06	1981-07	1981-08	1981-09	1981-10	1981-11	1981-12	1982-01	1982-02	1982-03	1982-04	1982-05	1982-06	1982-07	1982-08	1982-09	1982-10	1982-11	1982-12	1983-01	1983-02	1983-03	1983-04	1983-05	1983-06	1983-07	1983-08	1983-09	1983-10
610	0.4	0.5	0.1	36181.1	36700	36700	36700	36700	36700	36700	36700	36700	36700	36700	36700	36700	36700	36700	36700	36700	36700	36681.6	36490.5	36238.2	36012.3	35808.5	35618.1	35440	35478.4	35952.8	36361.5	36230.2	35878.3	35498.7	35125.1	34810.1	34535.5	34299.6	34227.9	34470.4	34907.7	35805.8	36676	36676.7	36434.4	36098.9	36141.3	36424.4	36670.6
1294	1	3	2	393.983	388.66	381.214	372.686	374.498	392.28	388.549	379.411	341.8	344.123	361.264	391.889	391.054	390.249	385.042	392.142	391.157	414.021	447.952	391.33	390.255	390.062	390.336	390.967	391.439	390.892	390.143	391.953	388.256	391.41	391.265	390.224	391.32	390.323	390.917	386.942	389.579	382.145	387.39	393.342	389.511	391.042	391.06	390.925	390.857	390.506
1247	10	0.4	0.2	1554.84	1518.96	1497.84	1464.51	1431.48	1415.58	1374.04	1313.39	1251.61	1513.82	1556.33	1726.03	1796.21	1805.3	1729.7	1759.98	1778.05	1775.54	1761.9	1747.95	1735.05	1748.06	1788.01	1773.27	1782.82	1779.34	1774.84	1789.83	1633.79	1746.74	1783.12	1788.58	1759.21	1768.61	1775.52	1777.73	1786.5	1738.34	1760.63	1775.56	1773.12	1785.14	1785.17	1760.86	1729.11	1695.09
1186	3	7	6	148.689	173.135	222.195	189.396	214.669	217.958	212.659	191.352	161.805	128.667	94.0294	59.5707	24.7344	1.08369	0.0539065	0.0487994	0.210686	64.2491	100.504	94.2811	78.4095	58.8439	37.3124	20.0448	3.4784	16.1577	43.0365	45.85	40.7701	30.8631	14.2353	0.351461	0	0	0.0789653	160.36	186.934	143.822	216.094	218.129	224.579	218.639	205.078	179.105	144.823	105.151
355	10	0.1	0.3	1171.02	1178.76	1140.12	1143.14	1170.05	1183.48	1156.28	1059.22	1003.17	971.308	1022.91	1160.25	1175.51	1168.87	1172.76	1139.12	1153.01	1194.41	1181.57	1092.68	1024.08	991.797	974.463	1039.81	1156.27	1173.04	1155.44	1125.51	1162.33	1172.94	1174.7	1086.06	1023.52	996.913	1070.37	1173.85	1159.15	1135.71	1173.33	1149.19	1158.33	1180.85	1146.56	1057.76	1041.25	1144.03
1302	10	3	0.3	554.513	551.718	551.163	550.179	546.416	543.124	535.446	507.633	496.179	510.733	523.676	548.821	548.723	551.972	552.65	554.472	553.639	556.995	563.547	554.22	554.471	553.893	553.206	555.032	553.285	554.361	556.051	555.461	552.433	550.067	539.659	528.731	521.834	517.342	514.641	512.92	515.168	527.589	549.112	555.427	555.149	554.026	550.639	546.451	542.437	539.588
1231	0.2	0.1	0.1	1289	1289	1289	1289	1289	1288.46	1280.47	1266.52	1250.28	1233.59	1216.84	1201.31	1185.36	1170.13	1155.09	1139.45	1129.29	1265.48	1289	1288.99	1287.94	1287.51	1289	1289	1289	1289	1289	1289	1289	1289	1288.35	1282.74	1270.71	1256.27	1243.65	1285.89	1289	1289	1289	1289	1289	1289	1288.98	1288.11	1282.16	1271.74
1140	3	1	0.1	509.859	509.16	508.314	506.043	504.932	504.871	503.645	502.621	501.676	502.07	501.622	502.713	502.422	501.596	501.599	500.8	499.816	499.453	498.096	497.269	496.584	495.554	494.35	493.731	492.543	490.641	489.961	486.511	486.573	490.95	497.371	496.51	495.457	494.671	493.933	492.316	492.941	509.9	512.92	512.527	511.333	510.399	509.028	507.557	506.272	555.636
1296	0.6	0.7	1.5	429.901	410.44	394.687	368.831	340.696	316.056	288.169	256.043	223.985	194.174	164.324	134.008	125.934	125.225	126.205	126.249	126.283	124.161	127.335	126.339	126.334	126.085	126.249	126.988	126.058	126.151	125.839	125.898	128.715	127.989	126.357	126.325	126.337	126.221	125.584	125.23	126.098	134.78	156.979	174.009	174.823	186.05	169.587	146.356	127.723	126.23
1277	1.5	0.2	0.5	865.764	864.996	863.928	862.324	867.862	872.501	865.712	856.509	851.268	848.463	845.757	849.771	853.096	857.713	866.523	874.152	874.858	882.191	881.026	873.315	872.515	871.459	870.316	868.577	866.276	864.459	863.545	862.857	865.57	867.333	864.773	860.586	856.757	853.429	850.699	848.416	848.292	854.686	865.257	874.62	874.489	873.544	871.252	867.612	863.75	860.804
1280	4	2	1	455.056	370.603	280.878	195.779	128.121	120.416	117.841	111.347	195.469	494.219	470.179	469.669	479.033	478.377	477.373	473.773	441.522	391.168	320.904	241.159	176.782	130.353	145.971	126.167	119.655	119.447	119.612	119.515	119.058	119.171	119.632	119.478	119.684	119.408	119.523	119.48	119.449	119.213	119.361	119.756	119.605	119.366	119.534	119.49	119.435	119.425
182	0.5	1	0.2	678.162	966.678	1101.11	1096.26	1065.48	977.371	861.632	739.649	570.793	443.464	419.192	404.721	388.761	410.109	441.915	452.096	433.065	409.641	361.913	328.721	311.404	296.595	328.705	550.046	926.762	1047.85	1102.31	1102.67	1102.03	1077.92	1021.79	932.255	849.307	765.138	629.847	825.726	1041.79	1102.01	1102.44	1102.42	1102.29	1085.47	1014.01	921.569	842.849	757.786
1152	6	0.5	0.8	0	0	0	0	0	0	0	0	0	0	0	0	0	0	0	0	0	0	0	0	0	0	0	0	0	0	0	0	0	0	0	0	0	0	0	0	0	0	0	0	0	0	0	0	0	0
1295	0.2	0.1	0.1	827.072	867.562	872	872	871.986	870.603	861.07	847.634	834.255	825.443	816.168	810.558	808.703	820.816	825.76	822.211	824.301	858.854	871.331	865.979	864.362	860.401	871.99	872	872	872	872	871.992	872	872	871.203	867.42	858.358	853.692	860.597	872	872	872	872	872	871.999	871.955	871.134	869.949	869.302	867.145
629	10	0.1	0.2	256.854	261.528	250.33	262.721	256.449	262.1	251.597	279.459	257.574	272.112	268.04	265.014	284.11	253.317	271.115	273.264	253.44	280.734	248.365	275.923	277.428	243.862	272.885	271.857	253.356	271.239	269.588	260.121	259.242	267.051	287.556	280.107	249.929	257.366	256.535	290.887	266.837	271.145	258.266	254.974	283.393	279.127	251.244	269.473	265.595	277.216
1266	0.4	2	0.3	421.689	363.79	329.492	289.635	273.453	274.559	274.642	273.764	272.078	270.834	268.875	266.843	263.005	259.468	255.422	250.523	247.638	246.328	244.223	241.18	241.277	240.964	240.533	239.087	237.77	237.007	236.526	237.229	240.72	243.655	244.271	242.643	239.642	236.992	235.602	249.683	263.926	278.342	294.978	282.015	274.409	274.621	274.179	274.335	274.178	273.093
1176	1	0.1	0.1	470.216	464.246	457.946	450.371	443.174	446.048	459.777	477.97	491.73	679.748	669.366	683.834	657.144	609.468	571.435	538.769	496.847	478.947	479.116	479.228	479.341	477.469	479.486	479.24	478.261	478.794	478.963	479.28	490.108	547.504	616.079	610.477	586.806	552.039	509.623	479.739	478.504	488.827	482.206	479.346	479.05	478.988	479.093	479.193	479.459	489.06
758	10	7	0.6	259.599	258.809	258.82	266.862	263.408	255.654	244.947	241.17	251.001	252.255	256.744	260.949	262.181	263.479	261.503	264.309	261.377	261.268	248.174	221.362	205.408	210.534	200.953	193.914	192.868	190.302	189.008	193.685	188.794	183.988	195.232	201.088	201.137	227.848	250.003	262.387	259.979	255.394	261.151	264.029	254.678	251.742	255.311	240.193	232.507	239.846
1242	10	2	10	52.712	37.6706	16.9107	1.93966	0	0	0	0	0.891874	88.7931	61.2481	58.3646	57.8542	59.065	58.3127	58.5983	59.8848	49.0484	26.6676	0.900946	6.68545	15.6285	5.54078	0	0	0	0	0	0	0	0	0	0	0	0	0	38.6894	58.6511	61.8907	56.776	52.6577	34.9509	11.2969	0.00627578	0	0
1236	0.7	0.4	1.5	300.209	295.397	290.196	284.508	278.312	266.241	246.212	226.074	212.904	193.251	172.579	143.7	120.807	106.595	91.948	79.2959	68.2251	55.8602	53.0732	53.0815	53.093	54.0617	59.4158	54.8497	53.1314	53.0298	53.0809	53.0732	53.0553	53.0501	53.0474	53.0111	53.0554	53.0901	53.1056	53.0939	53.0697	53.027	53.0403	53.0376	53.0684	53.0478	53.0736	53.1047	53.1077	53.0883
1194	10	0.8	3	220.037	206.008	163.793	102.928	55.8543	49.415	49.5796	49.6314	48.5991	49.0162	49.4211	49.0602	49.5143	49.5253	49.2801	49.3019	49.5633	49.3137	49.3242	49.6729	49.7623	53.5995	78.0486	56.5271	49.433	49.024	49.5228	49.4978	53.169	54.7267	49.6723	49.49	49.5512	49.4518	49.5779	49.4565	49.2955	49.3287	49.3196	49.3473	49.4037	49.4645	49.3507	49.6844	48.9707	47.4356
[truncated: 434 more columns]

## Sheet: Outflow(OBS inflow-No Demand)
grand_id	p1	p2	p3	1980-01	1980-02	1980-03	1980-04	1980-05	1980-06	1980-07	1980-08	1980-09	1980-10	1980-11	1980-12	1981-01	1981-02	1981-03	1981-04	1981-05	1981-06	1981-07	1981-08	1981-09	1981-10	1981-11	1981-12	1982-01	1982-02	1982-03	1982-04	1982-05	1982-06	1982-07	1982-08	1982-09	1982-10	1982-11	1982-12	1983-01	1983-02	1983-03	1983-04	1983-05	1983-06	1983-07	1983-08	1983-09	1983-10
753	0.9	0.6	0.5	1498.72	1465.05	1579.4	1377.82	1635.44	1629.63	1338.28	1439.34	1538.86	1546.19	1357.37	1493.96	1620.64	1408.64	1443.72	1286.65	1946.01	1736.56	1275.89	1447.79	1507.02	1594.95	1537.5	1420.03	1607.41	1570.61	1666.18	1870.5	2180.25	2714.08	2298.62	2056.8	2277.44	2524.06	1859.61	1617.71	1595.33	1598.18	1814.01	1340.84	1716.5	1928.26	2292.54	1812.48	1382.36	1679.95
870	10	0.7	0.6	1863.84	1755.19	1788.58	1543.52	1703.8	1829.46	1809.33	1716.37	1634.75	1850.43	1688.03	1618.29	1979.98	1645.81	1613.15	1547.5	1869.73	1915.23	1841.69	1617.09	1631.86	1612.84	1809.42	1752.23	1974.89	1737.71	1860	1598.18	2305.11	1546.04	1925.79	1845.09	1771.19	2068.48	2078.42	1731.93	1857.18	2029.8	2018.18	1744.42	1849.74	1923.99	1908.02	2098.19	1729.87	1623.08
597	1	0.3	0.6	599.337	577.398	542.413	1048.87	2416.37	1919.18	1410.18	1780.96	841.238	551.564	581.051	572.142	535.51	514.26	543.737	573.184	608.251	598.636	490.892	517.55	600.169	574.632	490.728	523.836	556.14	573.063	542.105	612.769	669.979	1291.22	1542.98	817.831	739.24	874.868	763.063	816.964	589.302	654.978	1127.89	1190.93	2439.94	2340.91	1871.37	1832.57	1938.21	2162.53
307	0.3	0.2	5	386.554	364.096	428.676	382.324	428.224	489.939	522.837	374.628	376.312	436.554	385.842	407.781	404.164	382.772	397.869	369.22	960.024	2234.2	517.948	365.218	379.271	409.669	401.429	381.358	426.576	421.828	408.648	367.526	889.277	2197.63	1169.25	362.572	386.588	410.431	380.16	417.78	405.879	388.53	398.215	384.336	587.435	542.942	842.571	366.395	369.411	423.86
1753	4	0.2	0.3	6627.73	3865.15	13307.1	5852.97	5021.05	2332.31	2862.78	2780.91	2068.87	2039.51	2329.73	1953.94	2280.93	2844.76	2754.58	1328.59	2933.76	1514.11	2939.98	2186.95	2076.82	2056.05	1354.23	4214.25	9702.99	8456.22	6227.18	3209.11	1799.02	2123.12	2401.86	3809.28	2879.7	2705.74	3589.27	10611	5301.97	6474.39	3996.09	7626.61	8739.87	3581.19	3782.48	2852.07	1775.85	1294.36
297	0.4	1	0.8	385.021	241.653	194.052	783.133	1134.49	950.265	916.815	1026.78	830.678	808.242	747.81	942.983	623.483	320.882	315.909	562.879	1298.68	917.514	1225.4	1039.97	1052.84	1137.36	884.18	774.394	745.33	937.382	467.272	403.855	1234.5	1044.55	935.941	1074.89	1125.6	1015.67	732.964	856.238	789.452	704.116	624.828	629.874	1126.73	788.429	1109.36	930.199	922.724	832.324
1036	1	0.3	0.3	247.33	281.498	255.124	201.764	207.584	267.724	198.452	210.713	184.844	228.554	262.649	185.35	255.076	237.159	216.755	206.832	239.41	196.705	198.145	205.102	157.807	226.13	182.47	227.307	275.896	233.444	201.505	157.386	235.027	305.244	171.356	229.438	162.781	231.543	316.196	785.697	532.754	963.81	527.925	889.154	793.341	644.213	451.585	362.1	185.634	245.712
989	0.3	6	1.5	157.067	274.438	604.038	1187.39	369.353	92.3877	76.18	179.56	58.4212	143.99	85.1412	183.271	110.673	126.369	93.3005	75.4861	278.949	1834.89	840.517	842.017	622.323	669.571	558.096	487.459	664.655	1077.28	1083.83	333.479	1381.13	1396.01	800.779	1380.37	224.937	186.958	163.433	1419.87	430.307	585.777	774.377	2284.87	1841.14	1106.03	939.084	890.735	123.628	337.142
1026	1	2	0.3	164.294	191.888	147.368	101.002	129.05	215.091	95.6719	144.927	72.875	149.088	159.557	107.387	104.266	151.657	138.023	149.691	152.694	150.969	97.5457	143.194	107.266	127.916	110.765	172.936	183.093	531.109	303.019	219.949	219.893	450.56	171.485	263.195	131.419	128.626	204.079	1000.16	197.578	412.947	338.729	705.41	613.203	242.678	328.775	153.45	133.718	171.108
1848	1.5	0.8	0.3	266.871	163.983	426.382	187.793	198.249	233.793	213.899	226.528	264.52	210.203	170.353	73.3608	93.2765	128.263	180.109	174.115	162.694	126.408	113.593	85.9752	84.1821	88.6463	69.8678	97.6876	203.115	171.194	226.145	289.786	172.682	198.162	79.0437	122.952	69.7016	216.635	173.51	411.421	158.569	275.361	270.735	638.543	620.608	294.479	239.792	255.009	319.246	224.965
1869	1.5	0.8	0.1	235.671	130.949	360.226	284.538	335.275	233.416	175.323	123.602	398.171	145.343	233.793	96.9198	37.6803	116.421	124.516	60.417	66.784	39.5613	55.1069	21.8157	20.8083	25.5281	18.2517	25.3997	229.288	145.509	132.937	311.991	107.68	213.544	115.693	66.7952	82.0208	71.7768	188.33	354.794	245.464	445.2	342.718	592.619	509.612	276.835	344.876	166.607	183.979	238.465
7313	5	0.8	0.2	203.452	273.539	300.571	415.648	519.976	646.115	346.202	447.39	521.334	421.937	395.759	335.38	286.033	262.195	311.393	345.303	620.237	1039.88	384.645	412.799	354.897	345.905	357.796	309.066	248.713	317.63	360.315	434.085	541.341	1059.23	678.356	400.202	524.057	454.794	436.089	405.705	449.213	384.314	434.613	431.612	479.725	486.909	544.845	442.836	468.244	498.65
1042	0.6	1.5	0.3	76.7387	73.7207	133.096	183.172	113.477	121.8	47.0562	57.6608	61.2306	63.9043	59.0013	59.2131	62.8512	58.8944	71.2771	54.5366	71.7883	55.1005	50.6234	63.5184	45.8751	75.793	51.3964	59.8142	95.8753	107.497	120.993	106.323	143.289	149.751	84.1942	54.8818	49.3324	67.1974	91.0623	480.357	221.413	271.519	104.147	369.642	289.976	169.502	68.41	58.1368	56.2923	72.7856
884	0.6	0.8	7	2015.97	1263.18	1621.89	1582.31	2149.75	1967.89	2420.98	2878.05	1954.57	1967.27	1970.62	1100.21	1401.22	1375.04	1811.41	2570.43	2177.54	1932.82	2090.05	2486.55	1799.83	1393.32	1090.73	1338.84	1571.83	1070.18	1281.47	1864.48	1666.45	1305.49	1922.22	2386.75	2225.65	1704.1	2069.71	2049.32	2090.32	1605.12	1394.61	853.314	993.403	1527.87	1455.39	2766.16	2067.52	2038.02
1144	0.5	0.9	10	1198.99	925.823	822.718	1058.88	1219.05	855.351	710.51	711.113	798.567	1548.44	1003.9	1235.31	988.602	969.295	1050.19	1627.21	917.404	1892.31	1009.76	771.371	729.408	2044.94	1792.16	1344.14	1085.95	2202.91	1508.22	1156.61	2298.46	2954.15	1665.1	1165.54	757.246	830.345	884.208	4156.07	1692.91	2030.12	1712.39	1399.04	1798.93	1278.03	1008.16	790.572	791.983	809.41
1006	7	1.5	0.3	46.3698	59.3178	45.9282	27.4169	27.4148	34.9566	15.3861	48.3302	28.632	54.9493	21.8157	36.4185	31.2559	45.1313	34.2443	33.7981	56.9041	54.7529	19.6402	29.3119	18.797	80.8128	32.0364	32.818	53.4103	32.2594	79.3374	56.8104	105.722	112.069	35.005	86.5545	23.168	29.6022	63.9699	228.593	87.1571	38.8155	37.4424	287.463	147.405	136.819	125.623	29.6212	39.0262	103.94
1048	0.6	5	0.2	217.099	152.84	202.066	1335.29	1080.6	1049.23	77.6346	251.268	87.21	256.692	102.783	81.2485	96.3151	53.6839	60.6296	52.126	225.851	152.564	164.326	146.347	174.891	245.7	416.504	214.08	229.051	414.608	437.842	123.809	2371.24	2100.89	917.024	181.574	144.655	174.784	189.739	188.226	218.641	170.863	239.74	1460	1315.64	919.927	524.505	126.359	225.545	312.746
1032	3	2	0.1	53.2396	56.5717	145.034	406.446	108.899	21.0467	21.2897	58.0054	24.7318	62.487	18.7915	46.1908	35.6189	46.4522	31.1845	54.9384	38.8662	37.5672	22.054	40.5643	35.5839	59.437	41.2235	24.2051	54.3122	130.312	199.598	33.144	487.519	790.307	262.07	35.4881	21.2135	41.5495	48.5167	158.45	125.335	303.602	342.021	982.093	579.512	256.571	79.3437	24.8133	42.8057	88.2388
355	1	0.3	0.3	143.895	158.335	193.102	172.976	264.243	388.705	283.266	175.876	254.87	202.047	187.198	185.41	163.618	151.492	153.659	120.107	334.17	423.623	300.536	115.424	111.337	186.019	182.002	185.64	154.716	174.205	237.547	153.361	181.22	422.262	372.723	300.538	268.945	369.058	272.043	252.011	288.54	263.156	241.298	179.932	315.508	462.153	383.146	374.632	396.305	373.776
1101	6	0.6	0.3	147.077	75.3246	216.186	471.578	119.396	106.22	147.55	92.4232	155.367	104.03	170.842	66.6384	98.984	106.905	70.9371	113.527	106.298	145.919	74.1549	89.8586	106.837	82.0481	32.1112	72.9639	75.834	92.9793	117.786	118.223	65.7627	129.931	94.6213	180.501	63.223	54.0321	45.9096	194.672	225.736	328.939	102.583	358.202	378.268	77.9039	112.842	103.371	110.869	122.345
1023	10	7	0.1	185.679	188.658	210.334	650.704	199.124	189.992	23.0811	56.4191	25.3286	37.6822	36.4688	39.6727	41.0587	32.862	38.1109	34.3234	63.9904	133.234	86.7698	241.481	30.5907	50.376	393.353	110.219	39.2748	425.992	31.7959	145.924	823.932	645.139	241.428	91.8518	31.8411	37.833	41.8058	43.6086	39.6936	190.693	384.584	742.972	412.338	657.772	64.8223	29.1707	37.2309	449.575
1864	1.5	0.9	0.4	84.6195	63.385	212.361	102.625	107.913	130.71	102.838	112.091	98.9969	47.4878	64.5476	40.86	50.7508	59.1432	60.5147	37.7137	64.1503	39.6342	49.868	52.2011	48.0221	60.339	38.2148	50.1817	72.0005	40.9199	39.1996	84.8297	39.2137	62.2131	49.06	77.3012	86.5174	114.573	111.283	187.994	90.0533	171.398	173.77	285.074	278.984	134.202	142.248	116.636	155.504	105.845
1021	0.7	4	0.1	11.5191	6.3435	9.27062	76.7451	53.8886	95.1134	2.76635	10.1962	4.30751	8.22971	2.07734	18.8022	8.71923	5.08448	11.0597	5.89707	14.4535	17.2824	6.96401	7.42015	66.085	9.17211	112.266	16.5304	7.57996	45.0471	35.3684	6.50981	189.322	174.089	139.691	7.31743	4.25102	10.8873	10.2982	7.36454	7.81907	8.63046	52.9941	91.1797	59.1412	143.843	10.3035	9.84319	10.6238	8.27143
1120	0.6	0.4	3	9.18427	6.6616	6.49253	3.51118	12.7822	2.14716	1.08717	5.09685	16.2885	2.62327	4.79759	4.46291	8.92416	9.39667	5.14758	7.5931	7.72176	6.40748	8.78499	4.09535	4.52117	19.1737	1.48489	2.50756	15.6178	3.26888	7.45135	4.25549	67.9423	46.8771	32.7157	18.8652	58.6882	3.26619	13.4907	6.6279	6.22603	7.27522	4.31224	5.71702	9.00247	14.3146	1.00344	10.8024	3.11855	95.1491
182	8	0.4	0.5	1087.97	777.711	566.089	465.425	440.594	265.178	181.529	167	201.33	149.648	189.863	182.54	184.31	153.005	210.706	158.743	157.595	141.41	187.354	73.2736	78.6038	87.1421	310.89	562.653	705.82	985.215	1111.54	1146.37	879.95	474.239	164.938	187.042	185.538	211.196	483.176	655.899	651.057	849.769	1455.15	1005.19	876.625	909.901	458.524	169.489	191.062	174.925
7311	4	0.1	0.1	10.5191	10.2828	11.3899	24.7966	12.4472	3.58334	4.26709	11.6697	5.54134	11.1339	4.41513	9.14608	7.88211	12.0997	8.46585	7.46717	10.1757	5.4198	4.06637	9.0415	3.11561	15.4169	7.21147	4.35763	7.99751	9.21655	7.29288	3.58609	17.3871	173.4	7.41593	6.45858	3.80511	9.46887	5.67529	16.0636	5.31223	37.1431	85.8512	120.773	58.7848	6.11818	4.36376	4.44013	8.9266	15.3167
1755	1	1.5	0.5	86.4854	79.3475	102.321	91.4188	68.1794	59.2623	64.4063	62.1459	57.773	57.6266	70.2894	67.4045	38.3219	86.2206	50.2443	75.566	62.5154	164.128	61.7076	64.4318	60.9165	64.5418	94.6028	87.851	166.604	194.536	165.015	129.652	72.3543	59.5913	65.1973	75.1514	81.4457	58.4991	76.3431	125.743	57.0359	147.738	71.4837	232.495	297.522	139.392	168.94	114.96	49.6473	111.854
1192	0.3	0.6	4	303.614	448.258	345.044	351.092	408.815	103.067	66.9243	85.2686	52.9521	49.9053	69.9442	73.0415	61.041	80.4195	84.6899	77.7985	228.625	490.823	115.854	111.474	80.1184	119.206	69.2293	73.7055	99.3147	107.276	120.806	107.119	153.061	175.782	64.6204	72.2812	82.9981	70.6429	97.3336	426.5	191.559	492.145	401.921	194.465	184.056	63.5775	149.646	66.0577	79.5176	84.524
541	0.5	1	10	37.9824	32.875	41.2685	120.978	280.962	479.804	154.859	103.496	98.377	74.1133	36.6917	36.0658	29.0582	27.2932	33.6408	44.4569	70.0232	114.46	94.7683	61.3683	46.2405	40.1371	32.703	33.7398	33.5204	27.8864	45.449	87.3789	148.647	362.239	156.718	133.241	130.255	86.8337	85.0965	51.6278	36.6142	33.0924	53.9531	73.1603	158.262	473.172	253.55	143.803	102.33	95.8901
1716	1	10	0.5	27.6664	26.8029	28.7738	14.3751	22.1174	20.5378	22.5411	21.5677	20.9421	22.235	23.5728	31.245	21.439	30.97	14.9047	21.9842	44.6354	11.8413	20.9215	22.3353	21.1588	22.0886	21.7073	40.2068	35.6104	21.4619	44.3719	49.5452	25.3498	24.4725	24.1184	23.0354	23.9067	24.3452	25.5868	172.548	19.4782	20.7866	164.024	35.6776	115.769	89.4008	21.1539	24.0706	22.8209	39.8956
1883	5	1.5	0.2	75.5479	43.9789	74.0229	70.5239	79.1532	43.7794	42.1146	29.3551	18.4117	18.416	33.8367	38.3007	35.4245	46.5398	46.57	43.4012	52.4935	83.6552	47.0926	49.0146	38.8165	46.5167	33.69	49.6134	49.13	42.2675	41.929	56.3746	45.3077	31.8721	21.6726	15.5201	14.7382	15.9194	17.1045	87.6113	30.4652	151.795	79.375	47.2681	72.8703	60.1831	40.8617	43.0762	44.8382	37.8794
895	0.4	5	1	1436.23	1032.41	1604	2084.95	2274.92	2171.56	2499.41	2660.69	2538	2639.9	2549.87	1259.46	1025.22	907.36	1718.07	2325.06	2462.31	2349.98	2500.86	2425.63	2436.04	2532.46	1483.65	1085.89	1121.62	883.925	1316.82	2138.25	2188.8	1987.64	2252.93	2354.66	2332.3	2549.85	2903.39	2053.51	1809.89	1524.37	1659.62	1202.32	1869.79	1540.75	2141.88	2480.79	2556.57	2667.99
1093	0.4	2	2	21.2069	24.4359	46.0943	64.7079	164.951	68.1308	3.16477	8.63091	12.5562	24.5558	10.0688	31.674	14.0838	39.1071	62.9304	53.8987	163.574	192.963	104.994	53.517	8.28013	133.798	36.998	38.631	196.091	131.989	127.234	36.701	282.792	133.332	71.7324	22.7891	2.0452	38.9659	24.6812	238.94	65.4995	87.339	96.9458	134.193	302.394	105.724	70.3378	15.2944	5.77002	26.3124
1709	2	0.3	0.6	164.271	122.157	119.067	286.222	137.23	64.3564	100.221	135.019	52.0659	76.7423	94.2652	55.4901	65.0839	191.434	225.124	294.596	331.127	339.821	74.9941	107.659	78.8694	101.555	84.8452	227.387	254.08	345.644	475.286	161.792	182.137	160.928	71.6842	66.1187	60.7719	89.3766	95.2002	144.283	61.9589	157.593	249.053	307.529	222.133	92.5047	220.767	32.8344	70.9256	188.92
1017	8	1	1.5	33.228	52.8405	71.1288	68.5947	40.5721	21.1061	9.54215	24.3979	12.8515	11.8161	19.6687	19.4352	18.2945	25.2995	20.4126	32.5459	116.068	63.9518	78.1182	23.8167	17.1467	19.0541	56.6362	32.8056	70.8398	159.674	88.9318	96.5372	46.1266	43.4191	23.2931	115.553	69.6939	49.5806	61.3373	203.76	75.0932	93.6797	108.179	249.771	110.574	80.0695	92.3028	121.428	71.6583	28.739
[truncated: 434 more columns]

## Sheet: Storage(OBS inflow-No Demand)
grand_id	p1	p2	p3	1980-01	1980-02	1980-03	1980-04	1980-05	1980-06	1980-07	1980-08	1980-09	1980-10	1980-11	1980-12	1981-01	1981-02	1981-03	1981-04	1981-05	1981-06	1981-07	1981-08	1981-09	1981-10	1981-11	1981-12	1982-01	1982-02	1982-03	1982-04	1982-05	1982-06	1982-07	1982-08	1982-09	1982-10	1982-11	1982-12	1983-01	1983-02	1983-03	1983-04	1983-05	1983-06	1983-07	1983-08	1983-09	1983-10
753	0.9	0.6	0.5	19260.7	18912.2	18819.6	18838.3	18623.4	18854.3	19557.4	19709.1	19687	19813.6	19941.1	19621.9	19266.4	19124.1	19077.8	18784.8	18203	19384.1	20878.7	21017.7	20693.3	20386.2	20260.4	20178.2	19837.4	19602.8	20025.8	21024.5	21116.5	21547.8	23120.3	23493	22725.1	21896.4	21269.4	20921.7	20758	20732.5	21075.2	21007.2	20585.3	20756.6	21433.4	21278.8	20839.7	20452.3
870	10	0.7	0.6	13391.2	13367.8	13859.9	14175.4	13833.8	13436.3	13177.7	13091.6	13012.3	12959.7	13132	13335.1	13307.4	13522.2	13952.9	13904.6	13369.9	13126.3	13358.8	13828.9	13794.7	13534.8	13056.8	12707.7	12535.8	12936.3	14051	15620.5	16437.3	17799	18072.3	17956.2	17615.5	17322.4	17378.8	17740.5	17588.5	17397.5	18084.4	18660.3	18622	18133.1	17511.5	16982.2	16943.8	16681.3
597	1	0.3	0.6	17014.8	17080.9	17343.5	17461.8	17815.2	19285.6	19789.4	18611.2	17472.2	17283.8	17114.5	17025.6	16919.8	16737.1	16532.1	16233.9	16045.5	16290.7	16273.7	15923.2	15588.6	15528	15456.6	15273.8	14998.4	14784.3	14834.1	14916.6	15836.2	17408.9	17798.3	17483.7	17503	17506.7	17507.2	17495.6	17467.3	17507.1	17502.3	17505.2	17672.9	20246.4	23858.1	24440	23443.5	22026.1
307	0.3	0.2	5	22866.7	22755.9	22674.1	22677.6	22572.6	23058.9	23547.1	23432.8	23224.7	23052.2	23034.3	22949	22925.3	22907.9	22979.4	22962.7	23086.7	23560	23552.8	23408.7	23114.2	22908.4	22768.9	22663.5	22513.9	22552.7	22948.5	23322	23503.4	23560	23559.7	23519.8	23426.5	23394.7	23384.7	23384.8	23385.4	23401.2	23504.5	23494	23511.8	23559.5	23559.1	23470.4	23343.4	23222.9
1753	4	0.2	0.3	4629.92	4899.55	4589.8	4957.81	4771.51	4968.88	4855.72	4798.97	4804.12	4896.16	4783.73	4845.94	4817.14	4685.16	5015.49	4917.08	5167.68	4371.09	4851.41	4807.19	4837.84	4862.36	4770.25	4335.28	4635.95	4846.08	4900.28	4939.82	4913.12	4807.5	4802.71	4782.5	4790	4924.34	4812.61	4721.27	4883.69	4797.07	4918.72	4708.57	4736.32	4917.31	4863.8	4858.19	4853.19	4863.93
297	0.4	1	0.8	972.904	737.385	729.386	719.818	1609.49	3136.2	3585.45	3242.99	2761.41	2318.75	1881.05	1419.58	936.076	742.988	730.148	725.823	1099.01	2988.55	4268.78	4684.89	4286.84	3578.78	2883.08	2336.58	1787.44	1156.79	752.672	728.436	884.603	2485.55	4075.27	4104.68	3639.48	3073.27	2630.53	2141.43	1643.35	1219.26	809.092	724.58	929.458	2424.01	3309.95	3479.21	3082.31	2614.57
1036	1	0.3	0.3	3595.66	3501.15	3547.13	3729.22	3823.57	3891.21	4076.49	4124.92	4087.04	3985.87	3803.48	3692.51	3549.7	3335.65	3236.43	3118.76	2994.69	2935.54	2856.44	2793.21	2727.22	2601.37	2501.31	2423.47	2429.48	3019.9	3416.72	3650.95	3641.94	3709.21	3963.23	4030.88	4060.3	3972.5	3891.91	4787.26	5193.86	4768.32	4651.87	4692.61	4922.26	4803.62	4649.21	4651.81	4637.85	4528.41
989	0.3	6	1.5	196.844	183.97	459.489	666.131	646.626	617.744	619.069	574.784	563.653	488.771	417.184	286.381	207.428	123.736	44.7133	2.11371	131.51	778.302	1656.18	1339.81	640.009	497.101	616.302	622.252	607.029	612.325	618.089	629.363	591.601	1212.89	1408.21	798.648	621.754	623.492	566.588	555.511	638.913	605.624	614.113	1329.83	2458.46	2336.09	1741.63	997.156	584.871	561.599
1026	1	2	0.3	1243.51	1221.83	1341.28	1569.9	1633.96	1654.7	1644.57	1606.98	1567.5	1483.69	1363.34	1292.36	1226.3	1121.63	1026.84	970.073	973.278	1123.38	1322.33	1463.81	1534.02	1525.22	1543.89	1517.22	1541.41	1689.67	1690.09	1692.23	1685.6	1685.16	1692.74	1667.94	1668.57	1623.9	1585.62	1690.82	1700.45	1658.12	1691.92	1683.67	1702.07	1684.77	1686.9	1690.48	1675	1640.28
1848	1.5	0.8	0.3	1484.81	1527.12	1684.77	2237.4	2364.94	2240.97	2077.11	1895.16	1697.42	1524	1472.77	1481.13	1469.03	1481.12	1482.37	1485.03	1479.3	1483.76	1471.7	1447.14	1421.09	1405.83	1388.9	1380.19	1450.64	1542.31	1542.6	1559.36	1594.97	1504.58	1470.07	1469.44	1475.91	1482.3	1477.54	1711.4	2304.13	2446.93	2565.81	2631.61	2700.9	2690.15	2473.93	2274.31	2080.42	1864.78
1869	1.5	0.8	0.1	1343.17	1409.18	1731.57	2445.55	2485.44	2297.06	2175.82	2046.42	1850.94	1619.44	1499.69	1369.86	1334.92	1338.97	1337.3	1339.12	1333.36	1339.16	1331.6	1326.85	1327.75	1327.69	1330.29	1329.28	1337.78	1371.1	1351.76	1482.69	1611.55	1487.96	1352.96	1337.02	1337.24	1338.79	1335.98	1698.98	2377.13	2508.17	2548.01	2540.43	2598.22	2589.05	2330.75	2202.95	2060.71	1904.41
7313	5	0.8	0.2	1004.89	1002.16	1003.55	1000.94	1149.53	1597.45	1719	1470.12	1146.82	1034.14	1002.43	1004.34	1004.21	1003.3	1004.05	1001.92	1114.79	1689.5	1679.82	1409.25	1078.44	1002.28	1003.98	1003.49	1003.85	1003.49	1003.27	1003.28	1151.87	1623.96	1736.06	1630.13	1375.68	1292.42	1289.19	1268.74	1185.71	1104.87	1039.32	1008.71	1053.35	1384.34	1700.46	1627.38	1437.2	1376.75
1042	0.6	1.5	0.3	859.92	881.911	943.418	972.793	973.051	971.355	971.532	954.336	925.948	902.885	885.047	869.713	850.239	833.837	826.136	835.142	858.016	895.846	906.423	892.389	871.701	839.644	820.05	800.095	781.514	932.755	973.591	971.877	971.092	972.032	972.992	966.023	955.414	930.939	910.202	1150.09	1205.32	1034.34	971.704	973.601	1041.76	988.571	970.651	962.249	937.664	922.774
884	0.6	0.8	7	115.127	106.695	81.7273	105.052	74.4529	92.1859	94.8974	77.8138	95.3282	85.012	87.5475	123.692	99.3072	99.098	98.4728	84.5849	93.2477	110.669	82.6663	77.8065	90.2236	99.2529	104.844	89.6453	130.74	37.1912	72.021	90.2308	78.8356	61.3212	95.0107	99.0306	91.6276	102.787	96.7536	90.1255	85.9444	90.4478	88.6436	96.1244	0.173782	85.0611	54.5381	85.2862	91.321	89.3682
1144	0.5	0.9	10	1270.4	1616.37	2190.57	2288	2288	2288	2233.51	1987.04	1668.18	1265.48	1224.48	1181.99	1181	998.759	929.11	464.353	75.4372	93.743	104.012	134.553	53.5104	31.3656	121.514	110.445	113.571	99.6524	110.456	118.507	56.2533	98.9205	100.486	112.856	90.8073	140.848	121.095	79.1414	131.765	89.9268	116.833	94.305	91.2402	105.83	98.5608	179.717	151.984	52.2899
1006	7	1.5	0.3	501.023	492.359	530.031	651.96	689.964	687.213	667.472	626.42	595.384	559.197	539.355	515.079	492.684	460.797	435.66	416.544	412.322	487.236	624.397	641.854	634.555	609.55	639.582	659.33	679.463	782.608	822.531	822.082	820.011	821.516	815.916	806.332	806.378	800.269	783.001	827.365	828.162	821.139	821.851	830.756	956.916	929.381	830.279	807.04	777.694	777.43
1048	0.6	5	0.2	206.419	273.692	402.599	672.171	740.398	681.387	710.54	634.746	526.499	384.397	263.045	202.691	202.39	203.889	202.881	199.284	200.965	364.389	496.577	552.767	534.332	502.937	699.702	761.021	711.254	710.642	692.956	722.786	590.554	757.928	770.801	762.988	703.253	592.126	457.72	349.942	273.812	308.484	459.019	708.495	661.531	754.735	757.626	750.797	644.457	617.553
1032	3	2	0.1	480.31	486.439	587.156	757.604	756.822	740.173	713.644	665.729	626.97	588.795	551.767	509.153	477.807	434.293	399.226	373.992	378.184	429.565	514.19	510.839	512.987	507.747	592.167	637.906	648.337	737.798	754.634	761.468	714.947	787.721	786.927	751.475	751.339	726.676	700.254	715.438	738.095	739.411	752.515	796.439	921.383	776.907	738.849	709.049	662.863	663.072
355	1	0.3	0.3	1224.59	1224.2	1223.89	1224.66	1223.11	1227.18	1251.61	1223.73	1223.51	1224.95	1224.3	1223.92	1224.25	1223.82	1224.97	1225.8	1219.61	1321.98	1340.67	1205.94	1190.84	1219.57	1224.55	1223.74	1224.29	1223.45	1224.34	1225.29	1223.59	1230.64	1316.49	1285.57	1223.49	1226.98	1224.5	1224.12	1224.14	1224.45	1224.8	1225.17	1223.66	1299.16	1597.94	1559.34	1369.5	1249.49
1101	6	0.6	0.3	730.97	747.173	797.594	1162.31	1162.88	1141.52	1071.08	1003.39	908.148	819.783	752.621	748.668	707.851	678.695	682.07	712.976	693.632	720.035	767.713	744.638	682.819	658.342	627.049	600.389	600.775	712.062	790.475	834.211	886.031	831.913	778.804	722.899	691.483	674.98	667.019	797.83	1143.75	1133.4	1102.34	1133.4	1139.94	1175.84	1156.13	1093.76	1012.93	912.674
1023	10	7	0.1	598.004	579.997	571.407	583.962	621.548	577.154	528.231	523.764	530.461	518.168	503.12	494.049	486.565	478.158	475.942	475.158	495.415	592.206	623.453	550.123	488.357	524.471	514.623	624.33	584.703	522.53	506.021	613.5	565.375	590.857	627.768	611.46	614.309	611.096	603.361	601.421	611.836	590.648	587.869	583.875	589.854	593.791	580.585	641.287	645.988	497.893
1864	1.5	0.9	0.4	567.193	597.947	674.749	901.939	941.096	868.552	781.929	688.991	600.731	569.422	559.493	560.817	542.115	541.295	551.697	569.91	557.714	548.435	530.774	501.977	472.449	446.547	430.028	412.161	419.059	462.096	483.42	533.104	595.953	582.782	566.273	554.98	592.473	605.005	592.704	729.774	993.229	1037.26	1044.6	1055.79	1069.21	1056.36	960.689	877.035	787.059	732.825
1021	0.7	4	0.1	435.173	449.434	462.801	478.542	482.171	478.268	477.068	466.149	455.535	447.452	441.588	433.889	429.707	426.34	424.852	423.45	445.302	481.87	478.615	479.111	453.858	469.567	473.533	485.4	485.254	477.824	471.73	470.56	475.731	483.343	482.415	484.095	477.212	468.189	462.167	462.849	464.445	471.647	478.068	483.188	482.01	482.463	481.323	469.972	464.154	470.868
1120	0.6	0.4	3	83.0764	78.9546	76.0431	74.3332	73.7312	81.4762	81.6604	78.4564	66.7534	62.5249	59.4596	56.7231	53.308	45.3029	40.9212	40.265	42.09	61.3389	64.0463	59.8986	61.2276	63.1209	69.6092	68.5924	61.9603	58.3904	60.7114	63.6442	103.241	164.809	173.023	156.145	116.075	90.6111	84.9404	77.3971	76.4017	78.787	84.2329	85.9516	99.1201	112.506	112.758	105.136	101.112	131.748
182	8	0.4	0.5	461.603	642.791	718.056	696.149	713.442	717.522	732.336	644.151	588.263	549.662	485.31	458.325	447.743	447.443	484.554	582.684	607.141	441.88	178.511	106.791	106.86	106.701	143.352	466.679	714.445	674.075	704.896	681.688	709.132	711.303	728.964	677.65	667.641	650.638	688.29	645.054	678.655	684.881	696.843	708.258	695.437	698.745	724.356	717.785	728.301	715.829
7311	4	0.1	0.1	653.934	651.017	665.092	730.399	731.257	731.637	724.495	711.816	701.6	689.436	681.709	673.538	667.19	654.619	645.945	638.514	635.232	649.378	647.25	638.504	630.942	621.378	623.772	624.567	620.565	618.423	629.935	638.01	651.822	728.813	730.021	727.106	721.857	713.775	707.006	700.207	709.426	725.88	718.579	728.198	727.606	730.012	730.792	723.85	713.943	707.593
1755	1	1.5	0.5	121.473	177.134	308.031	400.632	395.305	378.309	347.837	308.007	264.249	218.799	171.047	115.633	98.4661	206.31	285.501	304.708	315.82	384.003	390.894	356.769	317.483	274.344	225.905	223.332	379.287	457.559	453.627	392.38	394.605	385.957	356.77	318.654	342.913	325.521	282.088	281.476	370.03	396.504	397.686	394.816	535.211	657.354	529.925	396.751	328.689	251.621
1192	0.3	0.6	4	34.2876	74.3338	67.0515	60.9263	78.1959	79.3551	63.0581	26.0273	0.159294	0.0689444	0.0595979	0.104555	0.00954013	0.252521	10.384	22.3467	39.1391	72.7767	84.7691	51.038	23.3942	3.57928	19.745	21.2458	10.998	45.6309	70.392	80.1682	64.0705	71.9574	46.6037	45.3131	8.92367	0.242649	1.60644	60.0202	82.178	56.6666	74.5908	68.8727	40.9891	70.2223	62.0508	84.7957	56.6453	18.1937
541	0.5	1	10	0	0	0	0.278529	51.5874	69.4375	81.6717	69.0307	39.7744	5.59439	0	0	0	0	0	0	0	6.25127	12.7858	0.194449	0	0	0	0	0	0	0	0	29.3283	68.5761	80.0034	74.344	69.767	58.6842	36.578	2.06134	0	0	0	0	6.97618	66.9866	79.1201	78.2648	65.7618	37.1986
1716	1	10	0.5	104.145	113.322	148.932	192.39	195.59	187.469	176.381	161.294	146.383	132.162	119.429	104.052	93.808	101.265	113.557	109.519	121.247	172.548	174.536	166.203	155.603	142.649	131.478	119.081	136.712	240.535	294.387	276.286	269.11	263.144	252.035	233.698	219.473	205.514	190.072	268.657	264.144	292.941	191.031	208.36	254.738	237.877	232.414	216.896	201.669	209.47
1883	5	1.5	0.2	285.452	285.804	288.354	288.659	286.992	288.958	288.823	289.2	287.931	282.959	286.69	288.864	288.7	288.746	288.286	288.657	288.216	288.594	288.726	288.734	288.797	288.759	288.969	288.929	288.573	288.813	288.6	288.406	288.643	288.808	288.529	286.858	281.527	276.727	271.446	274.103	287.56	288.85	294.903	288.914	287.459	289.191	288.658	288.651	288.961	288.741
895	0.4	5	1	28.0364	37.5983	18.9073	16.7467	35.6598	46.4243	74.3735	122.612	160.855	166.96	129.44	45.4428	30.1447	32.6115	14.9901	45.387	130.359	103.701	102.152	115.536	111.744	136.506	79.6637	29.3819	27.8211	28.9041	23.6481	15.6891	26.8484	26.2956	25.9982	73.4147	87.7588	120.775	107.562	85.4718	25.9726	30.529	25.138	32.6886	16.7257	32.6398	14.4251	104.517	171.103	173.325
1093	0.4	2	2	28.033	40.6985	47.1099	47.5819	47.5591	37.8492	18.0461	13.2281	1.6592	0.18621	2.58399	16.0084	22.2285	14.0805	48.3476	44.9083	39.7055	99.0008	77.9535	35.6049	19.0558	20.2483	50.7664	33.8264	31.2016	62.1139	57.8088	44.8249	44.0768	115.654	73.0283	42.3656	34.6932	6.707	0.0179822	43.7889	56.7198	41.3549	47.4443	45.3328	87.4165	119.468	37.0956	33.819	26.3526	9.89634
1709	2	0.3	0.6	82.1246	106.199	228.608	347.236	348.864	343.168	341.883	333.786	293.77	250.145	218.137	255.947	263.681	292.253	347.88	347.031	346.551	350.561	346.555	344.986	339.234	325.778	347.937	336.54	344.756	346.481	348.224	350.002	345.521	321.709	349.621	341.548	315	272.174	263.772	343.382	347.245	324.483	345.672	346.669	347.796	349.711	322.025	252.022	215.2	103.709
1017	8	1	1.5	47.4097	46.5151	48.6811	49.1488	49.1144	49.4405	49.8109	41.8645	43.5653	47.6362	48.7077	48.9654	48.7949	48.6335	48.9304	47.4358	46.989	49.3069	47.5505	50.0108	48.6274	48.1738	41.5148	48.9068	47.7395	60.0717	79.7372	51.8659	49.4927	48.4264	49.4013	41.4561	52.8434	49.6371	47.7683	184.392	314.155	282.429	227.28	122.35	293.534	309.046	249.569	160.117	63.8778	48.1526
[truncated: 434 more columns]
