# Supplementary material for: How can observational data be used to improve the modeling of human-managed reservoirs in large-scale hydrological models?
Source: Copernicus journal article supplement (doi:10.5194/hess-2024-291), 2024-10-25
Supplement: Supplementary file [file hess-2024-291-AC1-supplement.pdf]

Dear Reviewer,

Thank you for your thoughtful review and insightful comments, which have helped us improve our manuscript. We have carefully revised the manuscript to address all your suggestions. Below, you will find our point-by-point responses to your comments (in blue).

---

### Reply to RC#1

---

**RC#1:** This paper investigates whether storage anomalies, derived from remotely sensed data, can be used as data to enable the calibration of reservoir modules within large-scale hydrological models. This would enable improving the representation of reservoir within hydrological models for places where storage time series are not readily available (note this is never said explicitly in abstract or intro).

It uses 4 simple release rules (3 of which can be calibrated) from well-known global hydrological model WaterGAP, and 100 reservoirs from a comprehensive database of reservoirs from the United States, and for which observed storage is also available. It compares storage anomalies as the basis for calibration, with three other candidate time series: observed inflows, observed outflows, and estimated storage.

The idea is worthwhile, and the paper meets its main objective (TLDR: yes one can use storage anomalies). The beginning of Sections 4 and 5 suggest instead the focus was really on comparing reservoir release rules... but this in itself is a weaker contribution because there are many other release rules out there, why should we focus on these? To better reach the hydrological community beyond WaterGAP users, it would be best to instead show how the setup (different rules, observed vs. simulated inflows) shows that storage anomalies are a good choice of data, and the ability to get these for most reservoirs worldwide means rules presented in the paper can indeed be calibrated, and are of value (or in other words, the rules are basic and simple to calibrate, the existence of storage anomalies to carry out that calibration gives them value vs. the rest of the literature that they would not have otherwise). This will warrant rewriting quite a few bits.

**Response:** We are pleased that you find the general idea of the paper worthwhile. We appreciate your feedback and have revised the text accordingly to align with your suggestions. Our primary focus is now on utilizing storage anomalies to fine-tune the reservoir algorithms. In the revised version, we will clarify why our focus is on using storage anomalies to calibrate reservoir modules and why we compared the selected reservoir algorithms. Notably, prior to calibration, we did not anticipate that the performance of the algorithms would not differ much in most cases. This highlights a common challenge for large-scale modelers: determining which algorithm is easiest to implement while still achieving performance comparable to more complex approaches. Although calibration is required for the SA and WA algorithms, they are easier to implement than the calibrated H06 and even outperform it in general. For this reason, we believe that comparing simple release rules should be a substantial part of the manuscript. The study aims will be reformulated as follows in the final paragraph of the introduction:

**“The main objective of this study is to investigate how monthly time series of observed reservoir-related data can improve the simulation of reservoir outflow and storage in continental or global hydrological models. We focus on the suitability of observed storage anomaly for calibrating reservoir release algorithms, as these anomalies can be obtained globally through remote sensing-based observations. We compare their informational value to that of scarcer outflow and absolute storage observations, as well as the simulation results achieved with an uncalibrated reservoir algorithm. We utilized in-situ storage and outflow data from the ResOpsUS dataset for 100 reservoirs in the US to calibrate three reservoir operation algorithms. All algorithms were implemented in the global hydrological model WaterGAP 2.2e (Müller Schmied et al., 2024). The parameters of the algorithms were estimated using as alternative calibration targets, 1) storage anomaly, 2) estimated storage (calculated based on storage anomaly and GRanD reservoir capacity, detailed in section 2.3), 3) storage, and 4) reservoir outflow. Calibration involved optimizing parameters individually for each reservoir, algorithm and calibration target. To explore, in addition, the sensitivity of the model results to the quality of the inflow data, we calibrated the algorithms for a subset of 35 reservoirs with available inflow measurements, using observed inflow instead of the inflow simulated by WaterGAP. Finally, for a subset of 21 reservoirs, we determined the effect of incorporating, in the case of irrigation and water supply reservoirs, the downstream water demand in the reservoir algorithms.”**

In addition, we will completely reformulate the conclusions and focus on the applicability of (remotely-sensed) reservoir storage anomaly for improving reservoir release algorithms.

**RC#1:** Key result: the key result really is whether storage anomalies fare well vs. the other data the reservoir model can be calibrated / validated against, under different conditions (e.g., observed or simulated inflows). However, this simple key statement is absent from the abstract, and this means the other statements on results seem disconnected from the purported aim.

**Response:** We will revise the abstract accordingly and update the manuscript text based on your previous comments. The key results are now easier to follow. Below, please find the revised abstract:

**“Human-managed reservoirs alter water flows and storage, impacting the hydrological cycle. Modeling reservoir outflow and storage is challenging because it depends on human decisions, and there is limited access to data on reservoir inflows, outflows, storage, and operational rules. Consequently, large-scale hydrological models either exclude reservoir operations or use calibration-free algorithms for modeling reservoir dynamics. Nowadays, remotely-sensed information on reservoir storage anomalies is a potential resource for calibrating reservoir operation algorithms for a large number of globally distributed reservoirs. However, it is not yet clear what impact calibration against storage anomaly has on simulated reservoir outflow and absolute storage. In this study, we address this question using in-situ outflow and storage data from 100 reservoirs in the USA (ResOpsUS dataset) to calibrate three reservoir release algorithms, the well-established Hanasaki algorithm (CH) and two new storage-based algorithms, the Scaling algorithm (SA) and the Weighting algorithm (WA). These algorithms were implemented in the global hydrological model WaterGAP, with their parameters estimated individually for each reservoir and four alternative calibration targets: monthly time series of (1) storage anomaly, (2) estimated storage (calculated based on storage anomaly and GRanD reservoir capacity), (3) storage, and (4) outflow. The first two variables can be obtained from freely available global datasets, while the last two variables are not publicly available for most reservoirs worldwide. We found that calibration against outflow does not lead to skillful storage simulations in most reservoirs and improves the outflow simulations only slightly more than calibration against the three storage-related calibration targets. Compared to the results of the non-calibrated Hanasaki Algorithm (DH), calibration against both storage anomaly and estimated storage improved the storage simulation and slightly improved the outflow simulation. Calibration against storage anomaly resulted in 64 (39), 68 (45), and 66 (45) skillful storage simulations for CH, SA, and WA, respectively, during the calibration (validation) period, as compared to only 16 (15) for DH. Utilizing estimated storage instead of storage anomaly does not provide added benefit, primarily due to inconsistencies in observed maximum water storage and storage capacity data from GRanD. Findings show that the default parameters of the Hanasaki algorithm rarely matched the calibrated parameters, highlighting the importance of calibration. Using observed instead of simulated inflow has a more significant effect on improving outflow simulation than calibration, whereas the opposite is true for storage simulation. Overall, the performance of the SA and WA algorithms is nearly equal, and both outperform the CH and DH algorithms. Moreover, incorporating downstream water demand into the reservoir algorithms does not necessarily improve modeling performance due to the high uncertainty in demand estimation. Therefore, to improve the modeling of reservoir storage and outflow in large-scale hydrological models, we recommend calibrating either the SA or the WA reservoir algorithm individually for each reservoir against remote sensing-based storage anomaly, unless in-situ storage data are available, and to improve reservoir inflow simulation.”**

**RC#1:** Description of methods. Several points there. First, there is no clear and concise explanation of how storage anomalies datasets are constructed. Similarly, it is never clear what the point of estimated storage is: it is constructed from monthly storage observations, is this something as readily available as storage anomalies? This should be added to 2.3 and 2.4, along with examples (maybe from the same 3 reservoirs from the results?) of how observed storage, storage anomalies and estimated storage compare for the U.S.

**Response:** We had briefly mentioned the method for calculating storage anomalies in line 271 of the first version: *'For the storage anomaly, the mean storage during the calibration period is subtracted from the data.'* In the revised version, we will clarify this as follows:

**“Storage anomaly time series for each reservoir is calculated by subtracting the mean storage during the calibration period from the in-situ storage data for each reservoir.”**

In lines 274–284 of the first version, we had provided an explanation for the estimated storage calculations. Storage anomalies do not account for the bias term, which can lead to a calibrated absolute storage time series that deviates significantly from the actual absolute water storage. We evaluate the use of estimated storage instead of storage anomaly because it facilitates calibration against (an estimated values of) absolute storage rather than storage anomaly. Estimated storage can be calculated using either storage anomaly (from remotely sensed or in-situ data) or absolute storage, along with the water storage capacity of the reservoir. Since storage anomalies are available globally through remote sensing data, and the GRanD dataset includes capacity information for reservoirs, estimated storage can be easily calculated for each reservoir. To improve clarity, we will revise the text as follows [Lines 273-298]:

**“Using in-situ storage data, we derived two additional storage-related variables: the time series of storage anomaly and estimated storage. These variables can also be estimated using remote sensing data. Storage anomaly time series for each reservoir is calculated by subtracting the mean storage during the calibration period from the in-situ storage data for each reservoir. However, the storage anomaly lacks information about the bias term and calibrating against it can result in a simulated storage time series that significantly deviates from the observed water storage. Having actual absolute storage is advantageous, as reservoirs are the only surface water bodies for which we can model absolute storage within the WaterGAP. To provide an alternative, we calculated the “estimated storage time series”; this term refers to storage values that are not observed directly but are estimated using storage anomaly and the reservoir capacity  $C$ . First, we determined the storage changes time series by subtracting the initial month's storage anomaly value from the monthly storage anomaly values. Assuming the reservoir reaches maximum capacity at least once between 1980 and 2009, we calculated the maximum monthly storage change, termed  $Dif_{max}$ . We then subtracted  $Dif_{max}$  from the GRanD reservoir storage capacity to estimate the initial water storage for the first month. The estimated storage time series is then obtained by adding the storage changes to this estimated initial water storage. Since the data are monthly, and daily maximum storage is generally higher, we applied a 1.2 scaling factor to  $Dif_{max}$ . This adjustment means that  $Dif_{max}$  used in our calculations is 20% higher than the initially calculated value. This 20% increase is derived from the mean difference between the maximum daily storage and the monthly storage observed in 100 studied reservoirs (see Table S1). The calculation of estimated storage can be performed using either absolute storage or storage anomaly, as the time series of storage changes would remain the same in both cases. An example using GRanD ID 597 (Glen Canyon Dam, Lake Powell) clarifies the calculation of storage anomaly and estimated storage. The mean observed storage value between 1980 and 2009 for Glen Canyon Dam is 22.45 km<sup>3</sup>. To obtain the storage anomaly time series for this reservoir, the value of 22.45 km<sup>3</sup> is subtracted from all storage data for the reservoir over the entire period (1980–2019). For calculating estimated storage, the  $Dif_{max}$  is 6.6 km<sup>3</sup>, which occurred in July 1983 (see Fig. S1). This is calculated as the storage anomaly value in July 1983 minus the initial storage anomaly value in January 1980. The initial storage is estimated as 25.1 km<sup>3</sup> (the reservoir capacity reported by GRanD) minus 7.9 km<sup>3</sup> (6.6 km<sup>3</sup>×1.2). This gives an initial storage value of approximately 17.2 km<sup>3</sup>. Storage changes are then added to the estimated initial storage to obtain the time series of estimated storage (Fig. S1c), e.g., the estimated storage for July 1983 is 23.8 km<sup>3</sup>, which is the sum of 17.2 km<sup>3</sup> and 6.6 km<sup>3</sup>.”**

**RC#1:** Second, the rationale for selecting 100 reservoirs is not super clear: why use geographical spacing on a 0.5 x 0.5-degree grid? That does not guarantee we have reservoirs that are not on upstream / downstream of one another.

**Response:** The 0.5 × 0.5-degree grid is the resolution of the WaterGAP global hydrology model. We use this model because simulated streamflow data are needed, as observed inflow data are not available everywhere and in practice the reservoir operation algorithm should use simulated inflow for operation. Several filters were applied, resulting in the selection of only 100 reservoirs out of the 679 reservoirs listed in the ResOpsUS dataset, as outlined in Section “2.3 Data.” The filters included:

1. A minimum of five years of storage and outflow data.
2. Storage capacity above 0.5 km<sup>3</sup>.

3. Ensuring only one reservoir per  $0.5 \times 0.5$ -degree grid (WaterGAP simulates all reservoirs within a single  $0.5 \times 0.5$ -degree grid as a single object).

Out of the 100 reservoirs, 51 are the most upstream reservoirs (see Table S1), meaning there are no global reservoirs upstream of them within the WaterGAP model. However, inflow into all reservoirs, regardless of their position, is based on the DH algorithm, where simulated inflow data by WaterGAP is first saved and then read from the saved files for all calibration experiments (as mentioned in lines 235–236 of the first version). This approach ensures that all calibrated algorithms use the same inflow data, preventing the operations of upstream reservoirs from affecting downstream reservoirs. We will clarify this further as follows [Lines 311-316]:

**“For comparison purposes, in all calibration experiments based on WaterGAP inflow, the inflow into reservoirs simulated by the DH algorithm was used to ensure that the same inflow data were applied across all algorithms. To achieve this, WaterGAP was first run with the DH algorithm to save the reservoir inflow data. These inflow data were then read from the saved files and used as the inflow source to model each reservoir independently. As a result, inflow into all reservoirs, regardless of their position, was based on the DH algorithm when applying the CH, SA, and WA algorithms, meaning that the operations of upstream reservoirs did not affect downstream reservoirs.”**

**RC#1:** Third, the explanation for the release rule would warrant separate paragraphs / sub-sections for each. Things are abstract and quite difficult to follow as such. SA and WA should reference the original paper(s) that introduced them. To clarify, do these rules use demand estimates to adjust releases the way H06 does? I would also urge authors to better explain the practical difference between the rules, e.g., with diagrams showing release as a function of storage.

**Response:** We will revise the text and add subsections for each reservoir algorithm. This paper introduces two new algorithms, SA and WA, for the first time; therefore, no prior references are available. These algorithms estimate releases without requiring water demand data. We will make it clearer in the revised version as follows [Lines 240-243]:

**“It should be noted that the new algorithms do not distinguish between irrigation and non-irrigation reservoirs; therefore, no water use data is required for their application, making their implementation easier than the H06 algorithm. This is because the estimation of downstream water demand at a large scale is generally very uncertain, and reservoirs are usually designed for multiple purposes.”**

Additionally, we will include a diagram (Figure 1 in the revised version) to illustrate the release estimation process for each algorithm.

**RC#1:** Four, a little bit more on calibration would be great. In practice, do you simulate N parameter sets and select the one with highest KGE? If so, how many parameter sets do you try? If not, what do you do?

**Response:** A more detailed explanation of the calibration process will be provided in section 2.4, “Model Variants and Calibration Approach.” We considered N parameter sets for each algorithm, though the number of parameters varies across algorithms. For irrigation reservoirs, 5,800 parameter sets were used for the Hanasaki algorithm, while 8,000 parameter sets were applied for the SA and WA algorithms. Table S2 presents the number of parameter sets under different conditions for each algorithm, along with the range of each parameter. The following will be added to section 2.4 [Lines 300-306]:

**“The three reservoir operation algorithms were implemented in WaterGAP. For each algorithm, the algorithm-specific parameters ( $a_1$ ,  $a_2$ , and  $a_3$  for the CH,  $p_1$ ,  $p_2$ , and  $p_3$  for the SA and  $q_1$ ,  $q_2$ , and  $q_3$  for the WA) were estimated by optimizing the Kling–Gupta Efficiency (KGE) (Kling et al., 2012), including the trend term (see Eq. 10). This optimization was performed through a single-objective calibration against the monthly time series of four variables: outflow, storage, storage anomaly, and estimated storage (see Section 2.3). The parameters of each algorithm were calibrated using a grid search approach. Reservoir outflow and storage time series were simulated for all parameter sets listed in Table S2, and the parameter set corresponding to the highest KGE was selected.”**

**RC#1:** Results. Several points to consider. SA vs. WA, the evidence for SA being better doesn't seem very robust, as (unless I have missed it) there's little evidence that the small nRMSE difference in favor of SA is statistically significant. I would instead, present SA and WA as equivalent throughout the paper (starting with the abstract).

**Response:** We agree with you that there is no definitive superiority of SA over WA. Our aim was to provide the reader with a clear choice, so we initially decided to conclude that, based on nRMSE, SA can be considered better than WA. However, based on your feedback, we have revised the text to indicate that SA and WA are equivalent.

**RC#1:** Figures 3 and 4: whilst it is great to see examples of reservoirs, the size of the figures and the choice of color / line style make this very difficult to read and understand. Please (1) use full page width (and even better, landscape page orientation) for each panel, and (2) adjust line width and line style, rather than using color codes that are not inclusive.

**Response:** Thank you for your feedback. In the revised version, we have plotted storage and outflow in separate figures, as suggested by the second reviewer, and adjusted the line width for the observations and the DH algorithm, improving clarity.

---

**Thank you again for sharing your helpful comments and insights.**

---
